# Supplementary material
Source: PubMed Central journal article supplement (PMC3064335)
Supplement: 1018444108_sapp.pdf [file 1018444108_sapp.pdf]

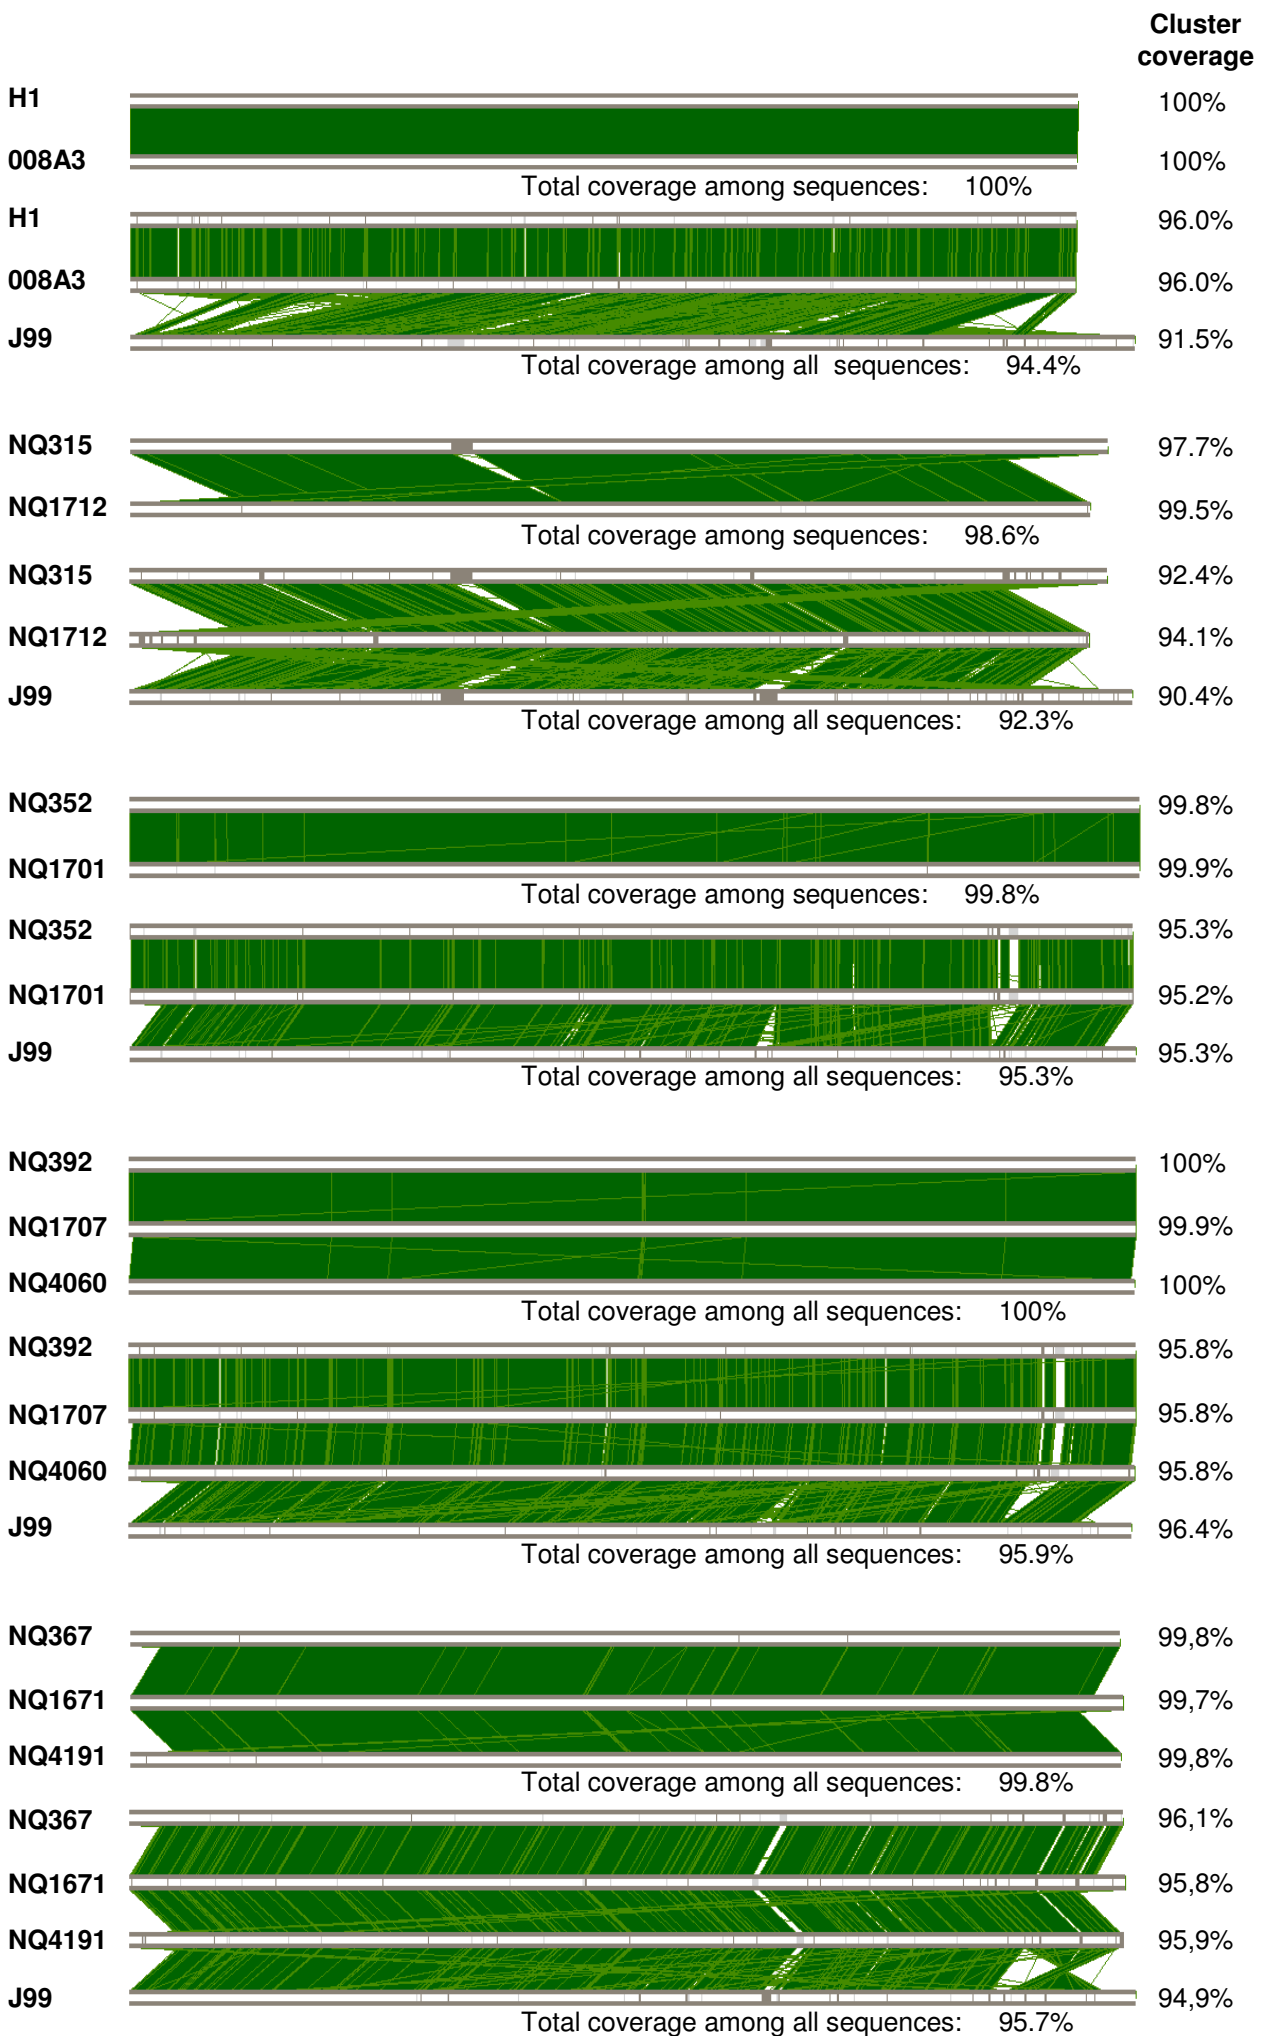

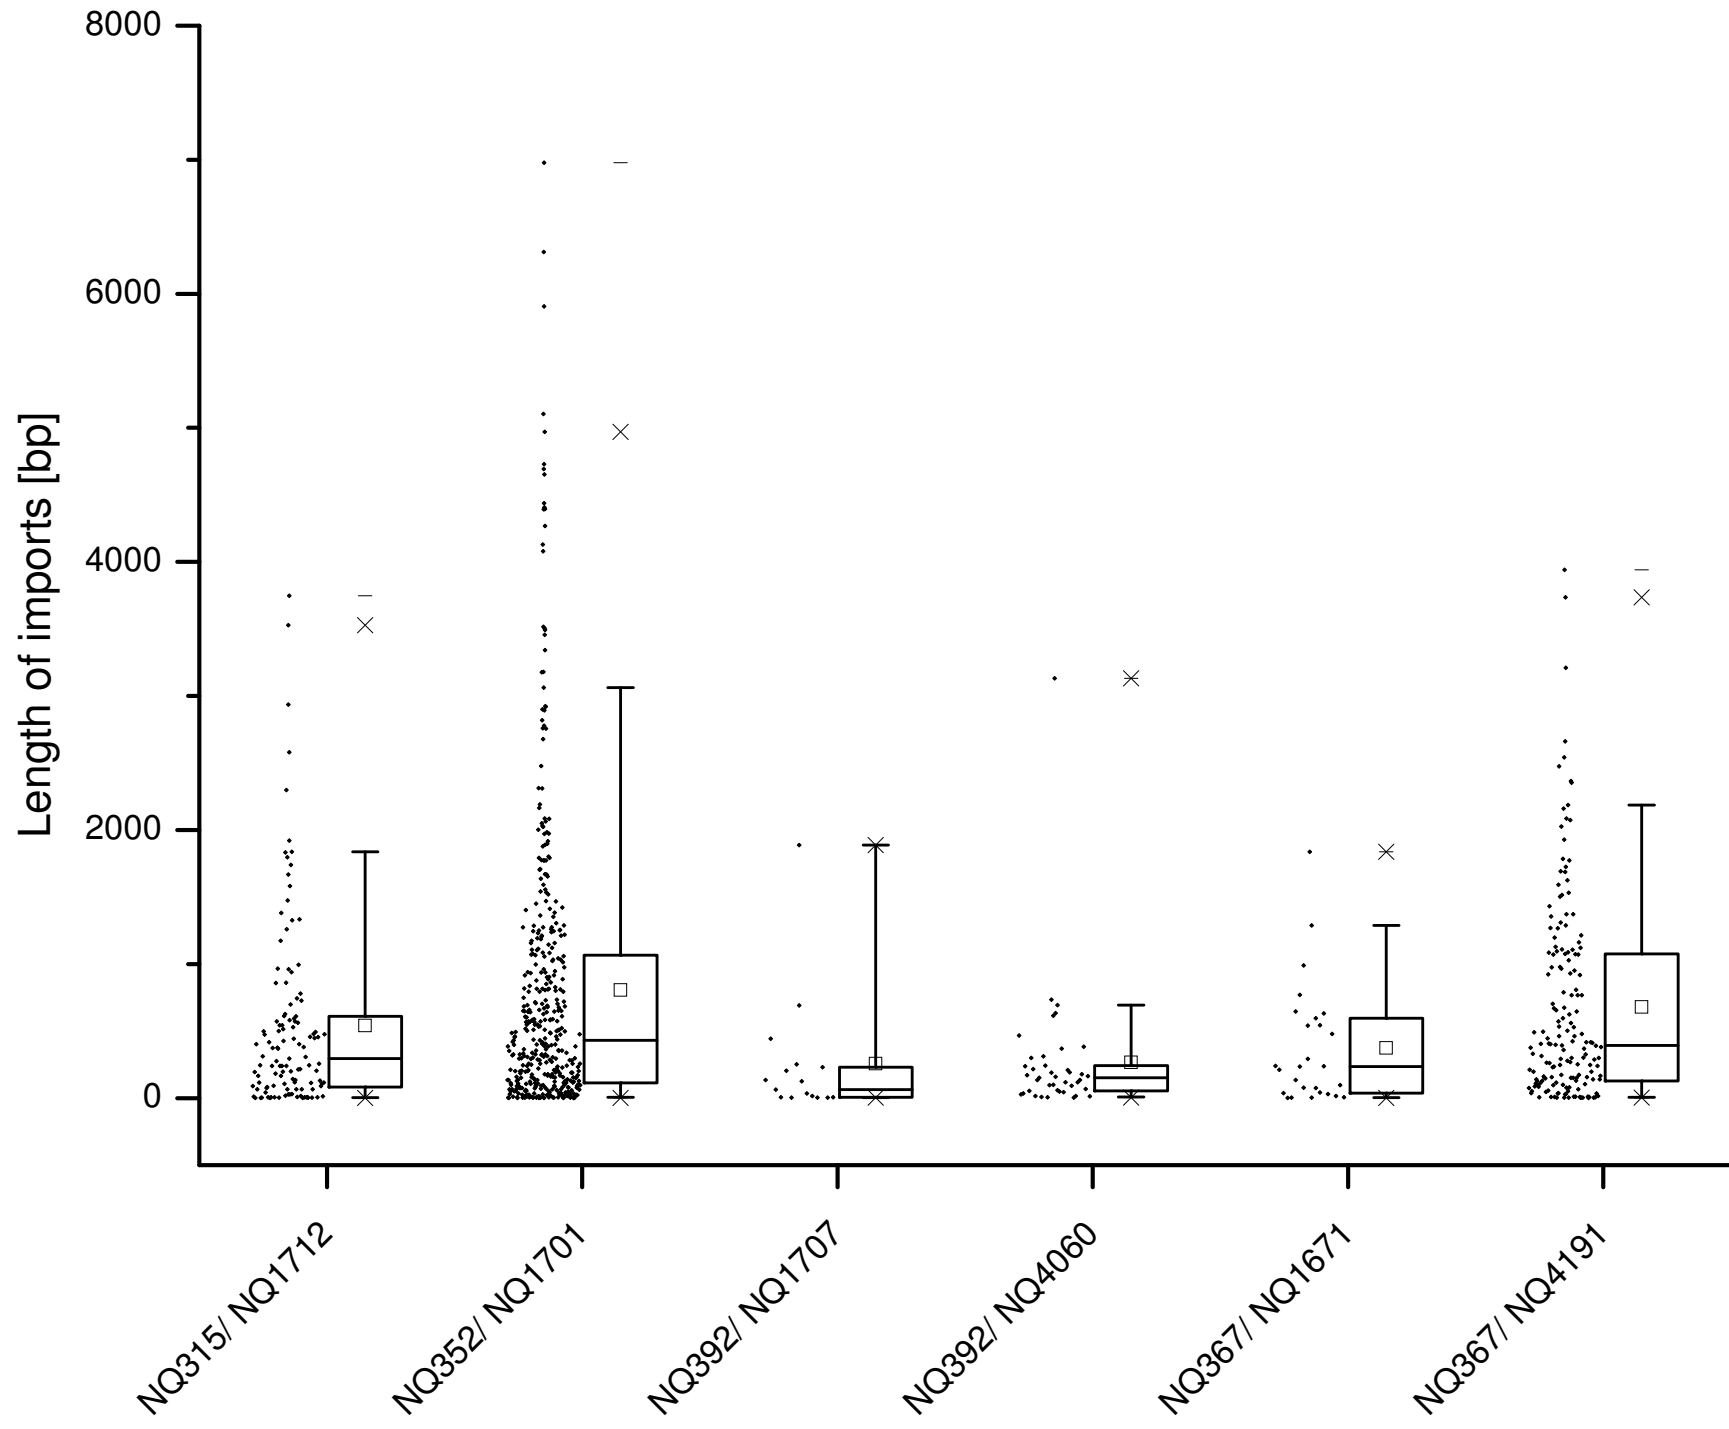

**A**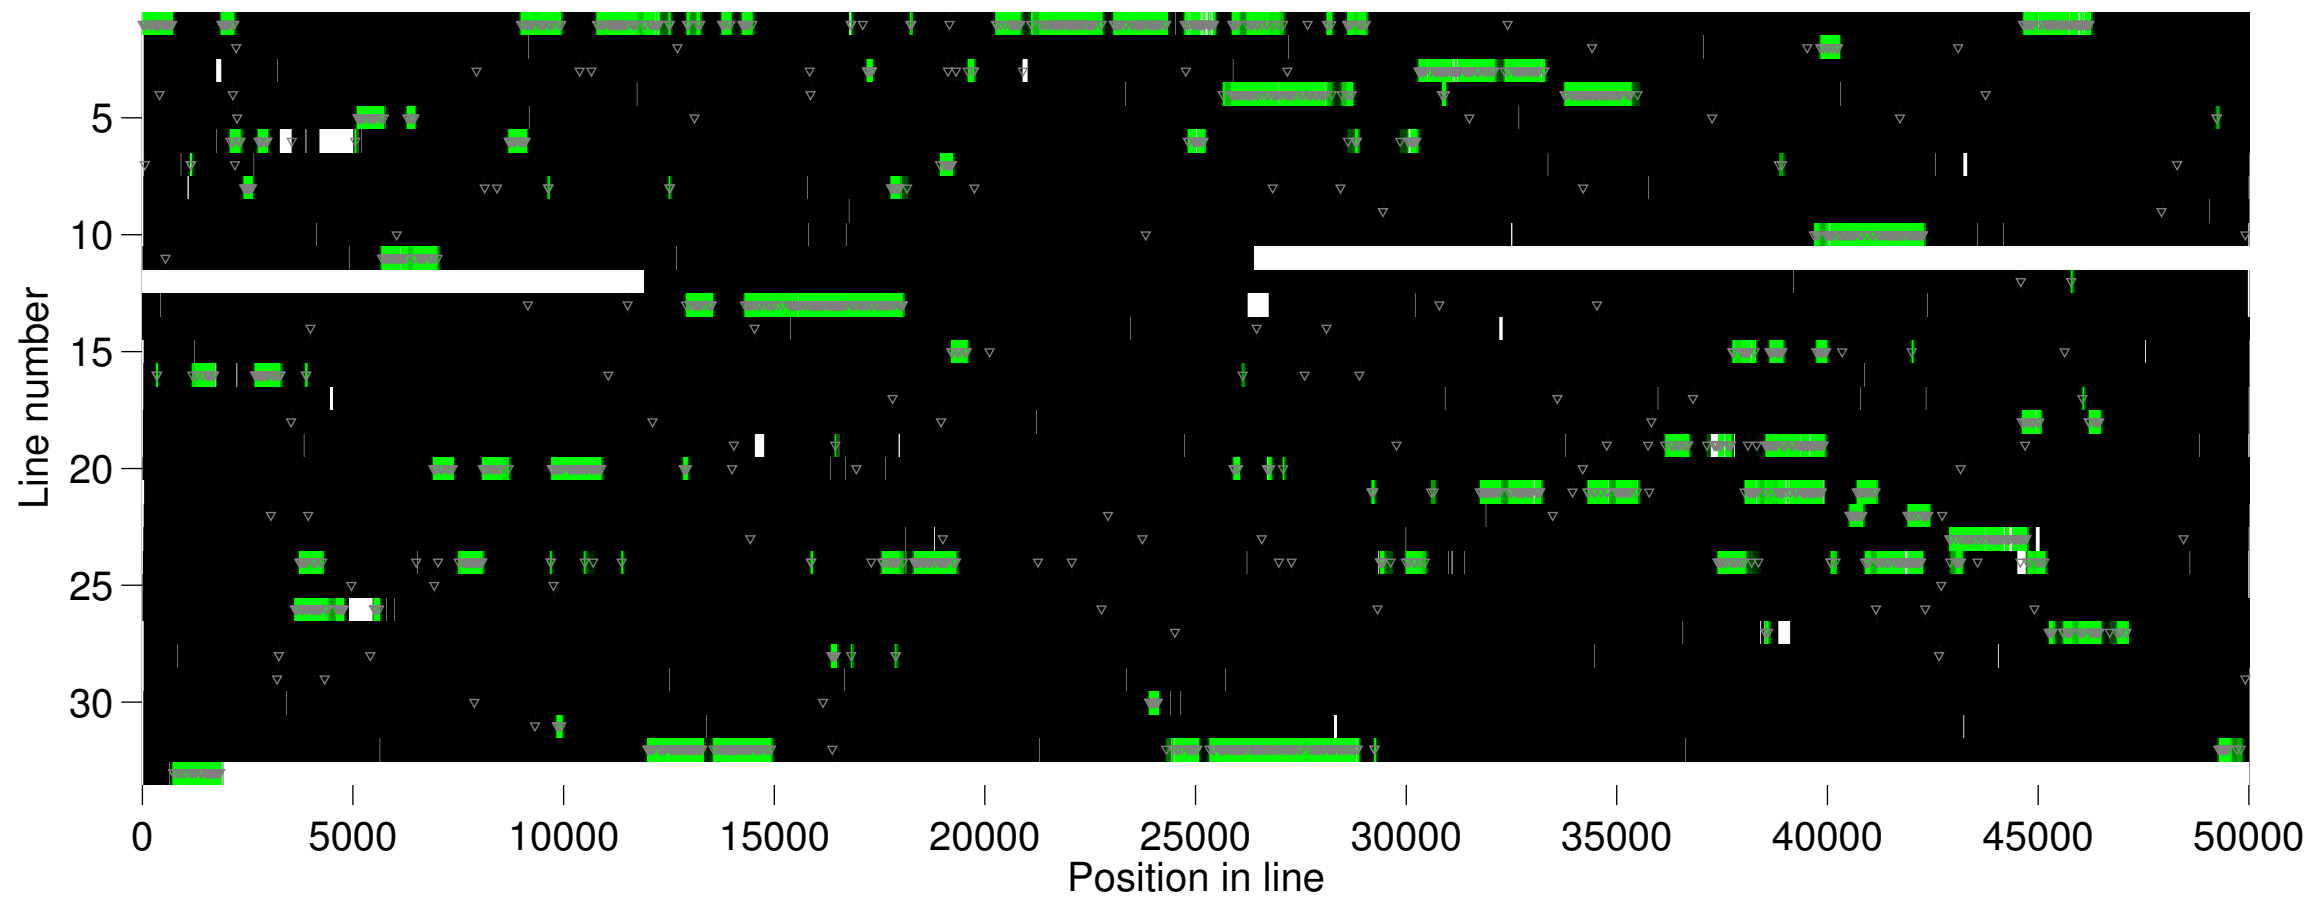**B**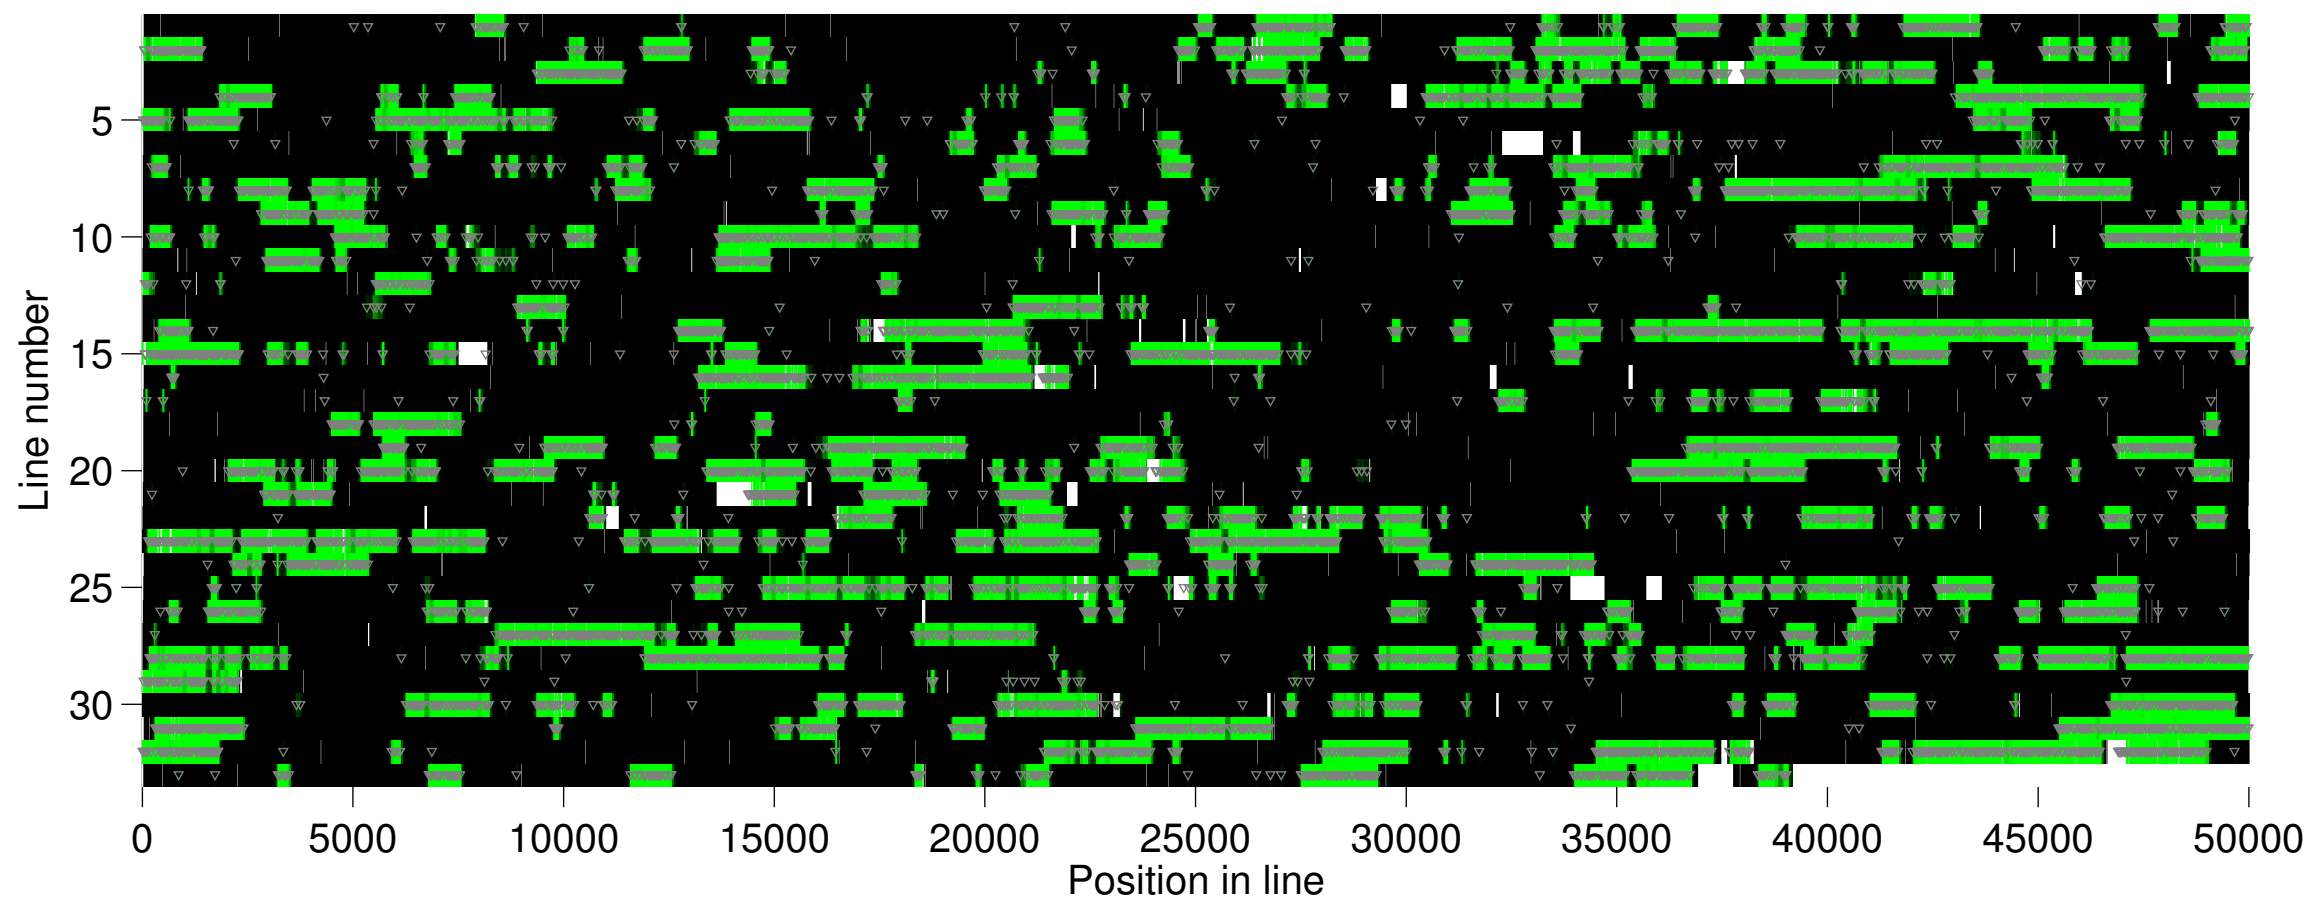

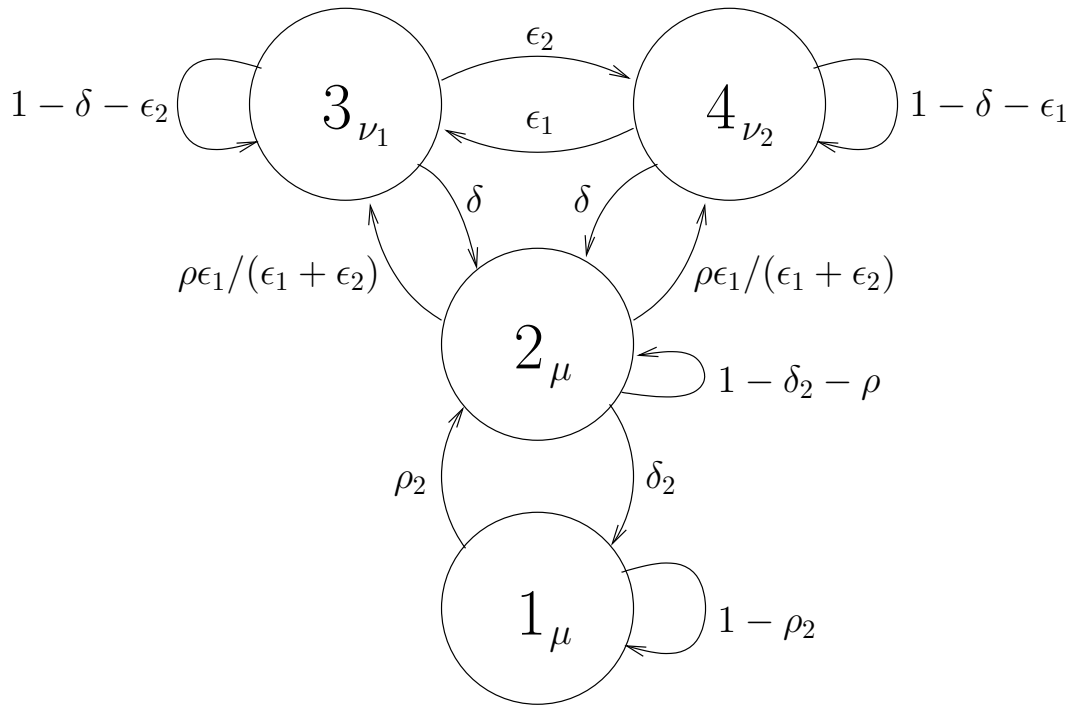

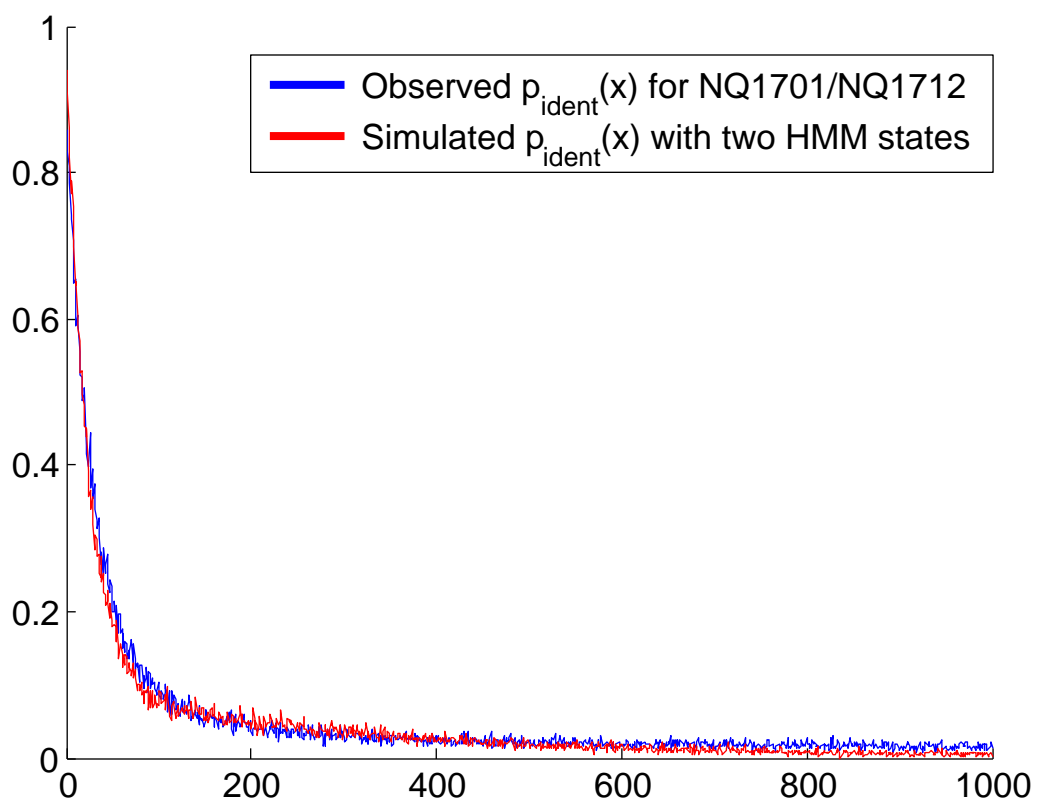

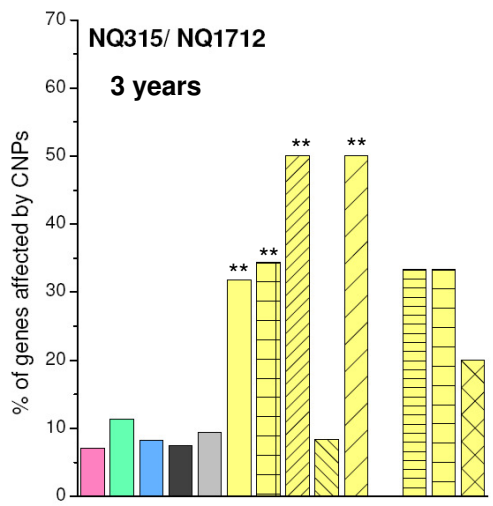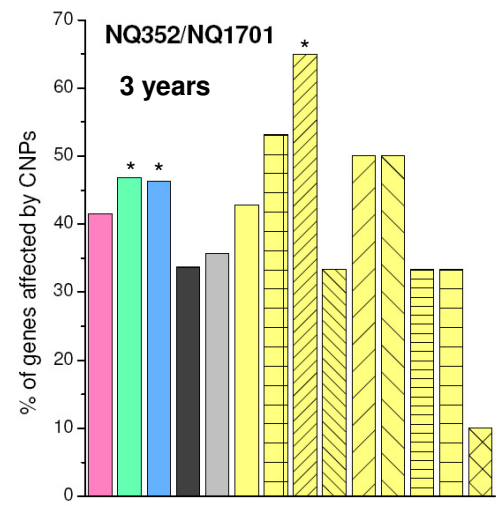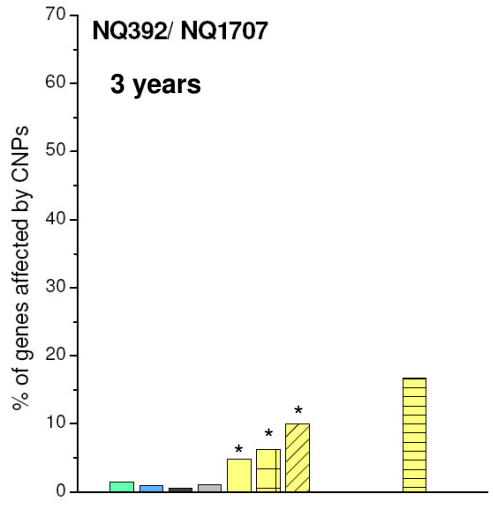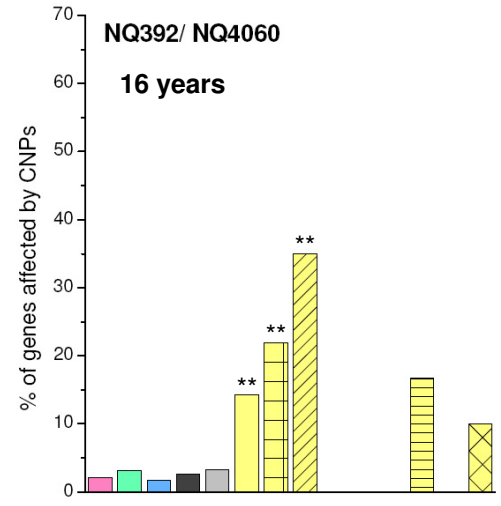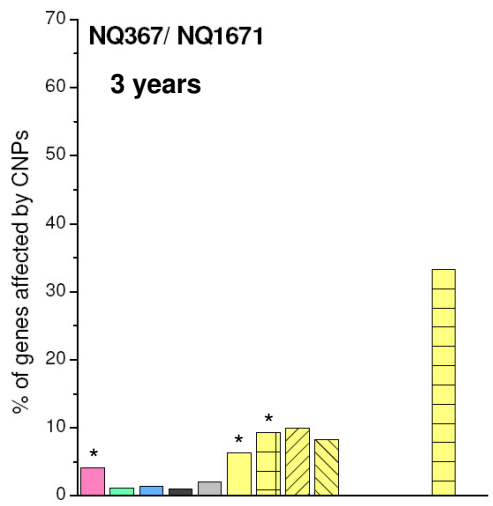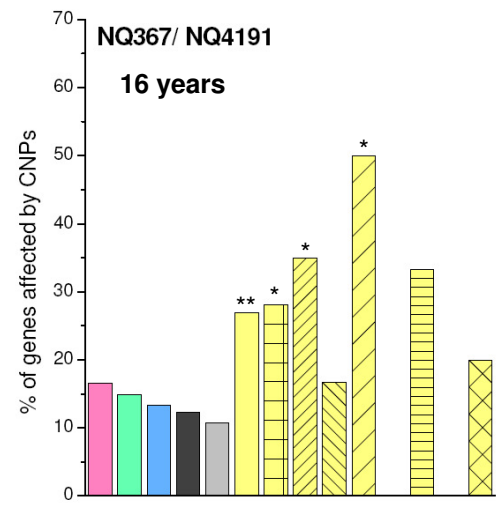

- Information storage and processing
- Cellular processes and signalling
- Metabolism
- Poorly characterized
- No category
- Outer membrane proteins
- family 1 (hop and hor)

- hop
- hor
- hof - family 2
- hom - family 3
- family 4
- family 5
- other

## Supplementary Text: Supplementary Figure Legends

### Fig. S1:

Alignments of paired isolates with each other and with the reference genome of *H. pylori* J99. Alignments were generated with M-GCAT. Grey bars represent the genomes, while green blocks indicate MUM-clusters (38).

### Fig. S2:

Lengths of the clusters of nucleotide polymorphisms (CNPs) in isolate pairs. For better readability, two columns, one depicting the length of individual imports as dots, and one with a corresponding box and whiskers plot are drawn next to each other.

The arithmetic mean is indicated by a small square ( $\square$ ), the 99% percentile by a cross (X), and the maximum by a short horizontal line (-).

### Fig S3:

Results of the ClonalFrame analysis of the aligned genomes of sequential isolate pairs NQ315/1712 (part A) and NQ352/1701 (part B). Each line represents 50 kb of sequence. Non-aligned regions are shown in white. Regions colored in black are clonal whereas regions in green have been imported. Polymorphism between the paired genomes is shown by grey triangles.

### Fig S4:

Structure of the Hidden Markov Model (HMM) used in the analysis of the paired genomes. The HMM is made of 4 states represented by the circles. State 1 corresponds to clonal regions of the genomes, state 2 corresponds to clonal regions surrounding imports, and states 3 and 4 correspond to imported regions (which are well modelled using two HMM states, as shown in Fig. S5). The arrows represent the transitions from one state to another and

the values next to the arrows represent the rate at which these transitions occur.

**Fig S5:**

The blue curve shows the observed  $p_{\text{ident}}(x)$  function between the unrelated genomes NQ1701 and NQ1712. The red curve shows the best fit to the blue curve of a two-states Hidden Markov Model. Such a model has four parameters (the two rates of substitutions in each of the two states and the two rates of transitions from one state to another) and the values of these parameters were chosen to give the best fit of the simulated red curve to the observed blue curve.

**Fig S6:**

Proportion of genes affected by imports for different functional classes of encoded proteins. Import frequency for a category is calculated as the percentage of genes affected by imports. Color-coding is shown below. Asterisks indicate significantly increased frequency of imports (Fisher's exact test; \*  $p < 0.05$ ; \*\*  $p < 0.01$ ). The composition of the group of outer membrane proteins (yellow bars) and the subfamilies (hatched yellow bars) is based on ref. (13).



## SI Materials and Methods

**DNA preparation.** Whole genomic DNA for 454 sequencing was isolated using Qiagen Genomic-tip 100/G columns and the Genomic DNA Buffer Set (Qiagen). Small scale preparations of genomic DNA for sequencing of individual gene fragments were performed with the DNAeasy Blood & Tissue kit (Qiagen).

**454 sequencing.** Samples of genomic DNA were treated following the protocols provided by the manufacturer. The process is summarized briefly as follows: 3-5  $\mu$ g of DNA were fragmented by nebulization. The DNA was then purified over MinElute columns following the PCR clean-up protocol from Qiagen. For FLX samples, an Ampure bead purification step was performed in order to remove small fragments and a quality assessment was performed with the Agilent Bioanalyser (DNA Chip7500). The purified, fragmented DNA was polished with T4 DNA Polymerase and T4 Polynucleotide Kinase (New England Biolabs, Beverly, MA/ Library Preparation Kit, Roche). After a half-hour reaction with kinase, the DNA fragments were purified again over MinElute columns, before blunt-end ligation (New England Biolabs Quick Ligation Kit/ Library Preparation Kit, Roche) to 454's proprietary double-stranded DNA adaptors A and B. The ligated DNA fragments were then bound to magnetic Streptavidin-coated beads (Dynal Biotech, Oslo, Norway/ Library Preparation Kit, Roche). Because of the non-phosphorylated 5' adaptor ends, the ligated fragments contain nicks, which were displaced with *Bst* polymerase (New England Biolabs/ Library Preparation Kit, Roche). Single-stranded DNA was melted away from the beads with 0.125 M NaOH and the single-stranded

fragments were purified over Qiagen MinElute columns. The resulting purified DNA library was run on an Agilent 2100 BioAnalyzer using a RNA 6000 Pico LabChip® (Palo Alto, CA) to quantify the single stranded DNA concentration, ranging from 200-500 bases (GS20) or from 400-800 bases (FLX). The library was combined with a solution containing emulsion PCR reagents and DNA capture beads provided by Roche 454 (Branford, CT) and amplification was carried out as described elsewhere (9). After amplification, emulsion breaking, and enrichment of the library beads, the non-covalently bound strand was melted away, a sequencing primer was annealed to the covalently bound, amplified strands, and the primed DNA beads were sequenced on the Roche-454 Sequencing System. Raw data processing and assembly were performed using proprietary software provided by Roche/454 as listed in Table S1.

**PCR and Sanger sequencing.** For Sanger sequencing, gene fragments were obtained by PCR amplification as previously described (36) and PCR products were purified using the QIAquick PCR Purification kit (Qiagen). Double-stranded automated sequencing of PCR amplicons was performed with the Big Dye® Terminator v1.1 Cycle Sequencing Kit (Applied Biosystems) and a 3130xl capillary sequencer (Applied Biosystems).

**Generation of virtual genomes.** Virtual genomes were generated in order to obtain a dataset more convenient to handle than a large collection of contigs. For this purpose an assembly was performed with the Kodon software either using the contigs of one isolate or using all contigs of a pair of isolates. Additionally the published genome of *H. pylori* J99 (11) was used as a scaffold, conserving the

integrity of the preassembled contigs and the contig order based on the pair wise assemblies created with the Kodon software. Colinearity of virtual genomes was checked with the programmes M-GCAT and Mauve (37, 38).

In the NQ392/1707/4060 dataset, some intra-isolate variability was detected, reflected by small contigs with variant sequences that were assembled to the same position in the virtual genome. In most cases, the contig with the higher similarity to the other isolates was included in the virtual genome. In the remaining cases, the contig with more reads was used for the virtual genome. Differences between the isolates reflecting this intra-isolate variability are summarized in Table S14.

**Pair wise analysis of sequential isolates.** The pair wise analysis of sequential isolates was performed using Kodon (Applied Maths) and Mauve (38). A list of polymorphisms exported from the software was used as a basis for the analysis, which was then curated manually. Indels in homopolymeric nucleotide tracts and 1 nucleotide indels were excluded from the analysis. Clusters of nucleotide polymorphisms (CNPs) were defined as groups of at least two polymorphisms with a distance of less than 200 bp between two consecutive polymorphic sites, flanked by identical sequences of at least 200 bp. Sequence differences not categorized as SNP or CNP are listed in Tables S15a-d.

**The statistical model.** We developed a Hidden Markov Model (HMM; ref. 39), the details of which are shown in Fig. S4. This model assumed that an alignment of two sequentially isolated genomes was made of parts that evolved clonally (states 1 and 2 in Fig. S4) and parts where recombination happened (states 3 and 4 in Fig. S4).

The differences observed between the two genomes in the clonal parts were caused by mutations and were assumed to be uniformly distributed. The substitutions observed in the recombined parts were introduced by recombination and their distribution was assumed to be the same as for two unrelated genomes, following ref. (4). This distribution can be characterized by the  $p_{\text{ident}}(x)$  function, ie. the probability that an import of size  $x$  does not result in any substitution (4). The  $p_{\text{ident}}(x)$  function was learnt by comparison of the two unrelated genomes NQ1701 and NQ1712, and was found (Fig. S5) to be well modelled using a mixture of two HMM states with different rates of polymorphism (labelled 3 and 4 in Fig. S4). Furthermore, our model allowed the recombined regions to be grouped through the use of an additional intermediate HMM state (labelled 2 in Fig. S4) occurring between clonal and recombined regions.

**Bayesian inference.** We performed Bayesian inference under the model described above by embedding the HMM into a Monte-Carlo Markov Chain (MCMC; (40, 41). Each iteration of the MCMC included a forward-backward move of the HMM (39) and a Gibbs update (42) for each of the parameters. The MCMC was run for 100,000 iterations. The first half was discarded as burn-in and the second half was sampled every 100 iterations to produce a posterior sample of size 500 for each parameter and hidden state. Convergence and mixing of the MCMC was verified by comparing runs with different starting conditions manually and using the method of Gelman and Rubin (43).

**Assignment of imports to functional gene categories.** The assignment of the location of imports to functional gene categories was mainly based on an automatic annotation of the virtual genomes generated with Kodon using the published genome annotation of *H. pylori* J99 as a reference. Ambiguities were resolved manually (e.g. when different annotation results for a CNP were obtained for the two isolates). These discrepancies could in most cases be attributed to disruptions of the ORF in one strain due to frameshifts within homopolymeric tracts. Predicted ORFs affected by CNP with no homologue in J99 were manually annotated by means of BLAST searches. COG classifications were used to assign genes affected by CNPs into functional groups. COG classifications were extracted from the *H. pylori* J99 GenBank file (as of May 2010), or, in rare cases, from the annotations of other published *H. pylori* genomes. If affected genes belonged to more than one functional group, they were counted once for each category.

Since frameshifts in homopolymeric repeats prevented a reliable automatic annotation of the virtual genomes, J99 was chosen as reference genome to calculate the total combined length and number of genes belonging to one functional category, which was used as the denominator in calculations of import frequencies. Genes assigned to more than one functional category were included in multiple categories. Since the outer membrane proteins of *H. pylori* have in most cases not been assigned to any functional category they have been grouped into an additional “functional group”, based on a previous detailed analysis of all *H. pylori* outer membrane proteins (13).

## References:

for References 1-36, see Main Article

37. Treangen TJ, Messeguer X (2006) M-GCAT: interactively and efficiently constructing large-scale multiple genome comparison frameworks in closely related species. *BMC Bioinformatics* 7:433.
38. Darling AC, Mau B, Blattner FR, Perna NT (2004) Mauve: multiple alignment of conserved genomic sequence with rearrangements. *Genome Res* 14:1394-1403.
39. Rabiner LR (1989) A tutorial on hidden Markov models and selected applications in speech recognition. *Proc IEEE* 77:257-286.
40. Metropolis N, Rosenbluth AW, Rosenbluth MN, Teller AH, Teller E (1953) Equations of state calculations by fast computing machines. *J Chem Phys* 21:1087-1091.
41. Hastings WK (1970) Monte Carlo sampling methods using Markov chains and their applications. *Biometrika* 57:97-109.
42. Geman S, Geman D (1984) Stochastic relaxation, Gibbs distributions and the Bayesian restoration of images. *IEEE Trans Pattern Analysis and Machine Intelligence* 6:721-741.
43. Gelman A, Rubin DB (1992) Inference from iterative simulation using multiple sequences. *Stat Sci* 7:457-511.

**Table S1: General features of the genomes analysed in this study compared with previously released finished *H. pylori* genomes**

| Isolate             | Number of contigs in virtual genomes* | Size range of contigs (base pairs) | Size (base pairs)               | Sequencing technology/ assembly software/ Reference |
|---------------------|---------------------------------------|------------------------------------|---------------------------------|-----------------------------------------------------|
| 26695               | -                                     | -                                  | 1,667,867                       | (Tomb et al., 1997)                                 |
| J99                 | -                                     | -                                  | 1,643,831                       | (Alm et al., 1999)                                  |
| HPAG1               | -                                     | -                                  | 1,596,366                       | (Oh et al., 2006)                                   |
| Shi470              | -                                     | -                                  | 1,608,548                       | (Kersulyte et al., 2009)                            |
| G27                 | -                                     | -                                  | 1,652,982                       | (Baltrus et al., 2009)                              |
| P12                 | -                                     | -                                  | 1,673,813                       | (Fisher et al., 2010)                               |
| B38                 | -                                     | -                                  | 1,576,758                       | (Thiberge et al., 2010)                             |
| H1                  | 31                                    | 766 - 339,083                      | 1,548,400                       | GS 20/ Newbler 1.0                                  |
| 8A3                 | 44                                    | 631 - 339,064                      | 1,547,179                       | GS 20/ Newbler 1.0                                  |
| NQ315               | 57                                    | 610 - 142,862                      | 1,601,938                       | GS 20/ Newbler 1.0                                  |
| NQ1712 <sup>a</sup> | 62                                    | 636 - 288,173                      | 1,572,582                       | GS 20/ Newbler 1.0                                  |
| NQ352               | 61                                    | 705 - 167,051                      | 1,639,151                       | GS 20/ Newbler 1.0                                  |
| NQ1701 <sup>a</sup> | 78                                    | 715 - 106,414                      | 1,639,623                       | GS 20/ Newbler 1.0                                  |
| NQ392               | 70                                    | 102 - 206,825                      | 1,650,953                       | FLX/ Newbler 2.0                                    |
| NQ1707 <sup>a</sup> | 79                                    | 102 - 133,105                      | 1,650,485                       | FLX/ Newbler 2.0                                    |
| NQ4060 <sup>b</sup> | 59                                    | 104 - 215,738                      | 1,649,736                       | FLX/ Newbler 2.0                                    |
| NQ367               | 90                                    | 101 - 97,875                       | 1,622,411                       | FLX/ Newbler 2.0                                    |
| NQ1671 <sup>a</sup> | 38                                    | 105 - 424,440                      | 1,626,950                       | FLX/ Newbler 2.0                                    |
| NQ4191 <sup>b</sup> | 42 + 1 <sup>**</sup>                  | 100 - 192,652                      | 1,624,247 + 4,818 <sup>**</sup> | FLX/ Newbler 2.0                                    |

\* for GS 20 datasets only large contigs (>500bp) were used to generate virtual genomes

\*\* indicates a plasmid in NQ4191

a isolated 3 years later than first isolate

b isolated 16 years later than first isolate

**Table S2: Isolated (non-clustered) single nucleotide polymorphisms (SNPs) in strain set NQ392/1707/4060. Positions refer to the position in the virtual genome of the first isolate NQ392.**

| SNPs      |           | Position in NQ392 | Annotation <sup>a</sup><br>Description                                                    | gene     | HP-number | jhp-number | COG | OMP | type of mutation |
|-----------|-----------|-------------------|-------------------------------------------------------------------------------------------|----------|-----------|------------|-----|-----|------------------|
| No NQ1707 | No NQ4060 |                   |                                                                                           |          |           |            |     |     |                  |
|           | 1         | 4989              | type III restriction enzyme                                                               | res_2    | 1521      | 1410       | V   |     | non-synonymous   |
|           | 2         | 23927             | type I restriction enzyme restriction subunit                                             | hsdR_3   | 1402      | 1424       | V   |     | synonymous       |
|           | 3         | 26130             | hypothetical protein                                                                      | -        | 1401      | 1425       | R   |     | non-synonymous   |
|           | 4         | 39606             | no annotation/ intergenic                                                                 |          |           |            |     |     | intergenic       |
| 1         | 5         | 42126             | hypothetical protein                                                                      | -        | 1384      | 1441       | -   |     | synonymous       |
|           | 6         | 49827             | NA <sup>+</sup> /H <sup>+</sup> antiporter 1                                              | nhaA     | 1552      | 1447       | P   |     | synonymous       |
|           | 7         | 50387             | preprotein translocase subunit YajC                                                       | yajC     | 1551      | 1448       | U   |     | synonymous       |
|           | 8         | 66523             | no annotation/ intergenic                                                                 |          |           |            |     |     | intergenic       |
|           | 9         | 82435             | putative outer membrane protein                                                           | -        | 1571      | 1479       | M   |     | non-synonymous   |
|           | 10        | 99012             | 2-dehydro-3-deoxyphosphooctonate aldolase                                                 | kdsA     | 0003      | 0003       | M   |     | synonymous       |
|           | 11        | 99437             | carbonic anhydrase                                                                        | icfA     | 0004      | 0004       | P   |     | non-synonymous   |
| 2         |           | 103155            | putative outer membrane protein                                                           | -        | 0009      | 0007       | -   | hop | synonymous       |
| 3         |           | 103403            | putative outer membrane protein                                                           | -        | 0009      | 0007       | -   | hop | non-synonymous   |
| 4         | X         | 103801            | putative outer membrane protein                                                           | -        | 0009      | 0007       | -   | hop | non-synonymous   |
| 5         | X         | 104180            | putative outer membrane protein                                                           | -        | 0009      | 0007       | -   | hop | non-synonymous   |
|           | 12        | 114458            | hypothetical protein                                                                      | -        | 0018      | 0016       | S   |     | non-synonymous   |
|           | 13        | 118477            | lipid A phosphoethanolamine transferase<br>ATP-dependent protease, ATP-binding<br>subunit | -        | 0022      | 0020       | R   |     | non-synonymous   |
|           | 14        | 132112            |                                                                                           | clpA     | 0033      | 0029       | O   |     | non-synonymous   |
|           | 15        | 142782            | hydrogenase expression/ formation protein                                                 | hypE     | 0047      | 0040       | O   |     | synonymous       |
|           | 16        | 166564            | hypothetical protein                                                                      | -        | 0066      | 0061       | D   |     | synonymous       |
|           | 17        | 168282            | urease accessory protein                                                                  | ureG     | 0068      | 0063       | OK  |     | non-synonymous   |
|           | 18        | 201686            | hypothetical protein                                                                      | -        | 0100      | 0092       | S   |     | synonymous       |
|           | 19        | 205996            | methyl-accepting chemotaxis protein (MCP)                                                 | -        | 0103      | 0095       | NT  |     | non-synonymous   |
|           | 20        | 232258            | hypothetical protein similar to HPG27_118                                                 |          |           |            | -   |     | synonymous       |
| 6         |           | 242763            | L-lactate permease                                                                        | lldP_1   | 0140      | 0128       | C   |     | synonymous       |
|           | 21        | 252500            | hypothetical protein                                                                      | -        | 0150      | 0138       | -   |     | non-synonymous   |
|           | 22        | 252772            | hypothetical protein                                                                      | -        | 0150      | 0138       | -   |     | synonymous       |
|           | 23        | 271343            | molybdopterin biosynthesis protein                                                        | moeA     | 0172      | 0158       | H   |     | synonymous       |
|           | 24        | 280539            | hypothetical protein                                                                      | -        |           | 0165       | -   |     | non-synonymous   |
|           | 25        | 283061            | apolipoprotein N-acyltransferase                                                          | lnt      | 0180      | 0168       | M   |     | synonymous       |
|           | 26        | 338498            | hypothetical protein                                                                      | -        | 0233      | 0218       | E   |     | synonymous       |
| 7         |           | 352114            | ATP-dependent RNA helicase DeaD                                                           | deaD     | 0247      | 0232       | LKJ |     | non-synonymous   |
|           | 27        | 395201            | putative vacuolating cytotoxin (VacA) paralog                                             | -        | 0289      | 0274       | N   |     | non-synonymous   |
|           | 28        | 416372            | peptide ABC transporter ATP-binding protein                                               | dppF     | 0302      | 0287       | R   |     | synonymous       |
|           | 29        | 431110            | outer membrane protein-adhesin                                                            | babA     | 1243      | 0833       | -   | hop | synonymous       |
|           | 30        | 437785            | poly E-rich protein                                                                       | -        | 0322      | 0305       | -   |     | synonymous       |
|           | 31        | 442803            | tetraacyldisaccharide 4'-kinase                                                           | lpxK     | 0328      | 0311       | M   |     | synonymous       |
|           | 32        | 488241            | copper-transporting P-type ATPase                                                         | copA     | 1072      | 0353       | P   |     | non-synonymous   |
|           | 33        | 492006            | ribosomal protein L11 methyltransferase                                                   | prmA     | 1068      | 0357       | J   |     | non-synonymous   |
|           | 34        | 506775            | translation initiation factor IF-2                                                        | infB     | 1048      | 0377       | J   |     | non-synonymous   |
|           | 35        | 546340            | no annotation/ intergenic                                                                 |          |           |            |     |     | intergenic       |
|           | 36        | 550434            | no annotation/ intergenic                                                                 |          |           |            |     |     | intergenic       |
|           | 37        | 578202            | no annotation/ intergenic                                                                 |          |           |            |     |     | intergenic       |
|           | 38        | 582071            | putative potassium channel protein                                                        | -        | 0490      | 0442       | P   |     | non-synonymous   |
|           | 39        | 607495            | ATP-dependent protease peptidase subunit                                                  | hslV     | 0515      | 0464       | O   |     | synonymous       |
|           | 40        | 622821            | cag island protein                                                                        | orf13/14 | 0527      | 0476       | U   |     | non-synonymous   |
|           | 41        | 627256            | cag island protein                                                                        | orf16    | 0529      | 0478       | -   |     | synonymous       |
|           | 42        | 634027            | cag island protein                                                                        | cagM     | 0537      | 0485       | -   |     | non-synonymous   |
|           | 43        | 639209            | cag island protein                                                                        | cagF     | 0543      | 0491       | -   |     | non-synonymous   |
|           | 44        | 643103            | cag island protein                                                                        | cagC     | 0546      | 0494       | -   |     | synonymous       |



| SNPs         |              | Annotation <sup>a</sup> |                                                      |        |               |                |     |          |                  |
|--------------|--------------|-------------------------|------------------------------------------------------|--------|---------------|----------------|-----|----------|------------------|
| No<br>NQ1707 | No<br>NQ4060 | Position in<br>NQ392    | Description                                          | gene   | HP-<br>number | jhp-<br>number | COG | OMP      | type of mutation |
|              | 45           | 670732                  | hypothetical protein                                 | -      | 0575          | 0522           | R   |          | non-synonymous   |
|              | 46           | 692326                  | penicillin-binding protein                           | -      | 0597          | 0544           | M   |          | non-synonymous   |
|              | 47           | 696077                  | methyl-accepting chemotaxis protein (MCP)            | -      | 0599          | 0546           | NT  |          | non-synonymous   |
|              | 48           | 741680                  | hydrogenase, small subunit                           | hyaA   | 0631          | 0574           | C   |          | non-synonymous   |
|              | 49           | 748043                  | putative outer membrane protein                      | -      | 0638          | 0581           | -   | hop      | synonymous       |
|              | 50           | 765780                  | protective surface antigen D15                       | -      | 0655          | 0600           | M   | other    | synonymous       |
|              | 51           | 770652                  | hypothetical protein                                 | -      | 0659          | 0604           | -   |          | non-synonymous   |
|              | 52           | 789244                  | putative, similar to jhp0914                         | -      | -             | -              | -   |          | synonymous       |
| 8            |              | 793478                  | putative lipopolysaccharide biosynthesis protein     | -      | 0679          | 0620           | R   |          | non-synonymous   |
|              | 53           | 794519                  | ribonucleoside-diphosphate reductase subunit alpha   | nrdA   | 0680          | 0621           | F   |          | non-synonymous   |
|              | 54           | 815312                  | 3-oxoacid CoA-transferase, subunit B                 | scoB   | 0692          | 0636           | I   |          | non-synonymous   |
|              | 55           | 826928                  | exinuclease ABC subunit A                            | uvrA   | 0705          | 0644           | L   |          | non-synonymous   |
|              | 56           | 834649                  | hypothetical protein                                 | -      | 0712/0713     | 0651           | S   |          | non-synonymous   |
|              | 57           | 842109                  | putative outer membrane protein                      | -      | 0722          | 0659           | -   | hop      | non-synonymous   |
|              | 58           | 843257                  | anaerobic C4-dicarboxylate membrane transporter      | dcuA   | 0724          | 0660           | R   |          | synonymous       |
|              | 59           | 848057                  | putative outer membrane protein                      | -      | 0726          | 0663           | -   | other    | synonymous       |
|              | 60           | 858765                  | no annotation/ intergenic                            |        |               |                |     |          | intergenic       |
|              | 61           | 864865                  | putative rod shape-determining protein               | rodA_1 | 0743          | 0680           | D   |          | synonymous       |
|              | 63           | 865362                  | putative rod shape-determining protein               | rodA_1 | 0743          | 0680           | D   |          | non-synonymous   |
| 9            |              | 872082                  | hypothetical protein                                 | -      | 0750          | 0687           | D   |          | non-synonymous   |
|              | 63           | 877246                  | hypothetical protein                                 | -      | 0757          | 0694           | R   |          | non-synonymous   |
|              | 64           | 886675                  | hypothetical protein                                 | -      | 0766          | 0704           | -   |          | non-synonymous   |
|              | 65           | 887775                  | no annotation/ intergenic                            |        |               |                |     |          | intergenic       |
| 10           |              | 890307                  | flagellar biosynthesis protein FlhB                  | flhB   | 0770          | 0707           | NU  |          | synonymous       |
|              | 66           | 894215                  | tyrosyl-tRNA synthetase                              | tyrS   | 0774          | 0711           | J   |          | non-synonymous   |
|              | 67           | 904406                  | putative outer membrane protein                      | -      | 0782          | 0719           | -   | hof      | non-synonymous   |
|              | 68           | 905358                  | hypothetical protein                                 | -      | 0783          | 0720           | -   |          | non-synonymous   |
|              | 69           | 931368                  | flagellar basal body-associated protein FliL         | fliL   | 0809          | 0745           | N   |          | non-synonymous   |
| 11           |              | 950800                  | dephospho-CoA kinase                                 | coaE   | 0831          | 0770           | H   |          | non-synonymous   |
|              | 70           | 972340                  | ABC transporter ATP-binding protein                  | -      | 0853          | 0789           | R   |          | non-synonymous   |
|              | 71           | 973745                  | guanosine 5'-monophosphate oxidoreductase            | guaC   | 0854          | 0790           | F   |          | non-synonymous   |
| 12           |              | 991398                  | putative iron-regulated outer membrane protein       | frpB_1 | 0876          | 0810           | P   | family 4 | non-synonymous   |
|              | 72           | 991710                  | putative iron-regulated outer membrane protein       | frpB_1 | 0876          | 0810           | P   | family 4 | non-synonymous   |
|              | 73           | 1006218                 | putative lipopolysaccharide biosynthesis protein     | -      |               | 0820           | M   |          | non-synonymous   |
|              | 74           | 1019447                 | phosphotransacetylase                                | pta    | 0904/<br>0905 | 0841           | C   |          | synonymous       |
|              | 75           | 1029645                 | outer membrane protein/ porin                        | hopC   | 0912          | 0848           | -   | hop      | non-synonymous   |
|              | 76           | 1064533                 | putative sodium/alanine symporter                    | -      | 0942          | 0877           | E   |          | synonymous       |
|              | 77           | 1064761                 | putative sodium/alanine symporter                    | -      | 0942          | 0877           | E   |          | synonymous       |
|              | 78           | 1065616                 | D-amino acid dehydrogenase                           | dadA   | 0943          | 0878           | E   |          | non-synonymous   |
|              | 79           | 1074552                 | hypothetical protein                                 | -      | 0953          | 0887           | -   |          | non-synonymous   |
| 13           | 80           | 1075188                 | putative aldehyde dehydrogenase                      | -      | 0954          | 0888           | C   |          | non-synonymous   |
|              | 81           | 1081561                 | NAD(P)H-dependent glycerol-3-phosphate dehydrogenase | gpsA   | 0961          | 0895           | C   |          | non-synonymous   |
|              | 82           | 1089056                 | putative cation efflux system protein                | czcA_1 | 0969          | 0903           | P   |          | synonymous       |
|              | 83           | 1096768                 | hypothetical protein                                 | -      | 0973          | 0907           | -   |          | non-synonymous   |
|              | 84           | 1119086                 | hypothetical protein                                 | -      |               | 0948           | -   |          | synonymous       |
|              | 85           | 1138219                 | putative paralog of HpaA                             | -      | 0410          | 0971           | -   |          | non-synonymous   |
|              | 86           | 1150734                 | 4-hydroxy-3-methylbut-2-enyl diphosphate reductase   | ispH   | 0400          | 0981           | IM  |          | synonymous       |
|              | 87           | 1158249                 | hypothetical protein                                 | -      | 0394          | 0987           | S   |          | non-synonymous   |
|              | 88           | 1168535                 | hypothetical protein                                 | -      | 0383          | 0998           | -   |          | non-synonymous   |

| SNPs      |           |                   | Annotation <sup>a</sup>                                           | gene   | HP-number | jhp-number | COG | OMP | type of mutation |
|-----------|-----------|-------------------|-------------------------------------------------------------------|--------|-----------|------------|-----|-----|------------------|
| No NQ1707 | No NQ4060 | Position in NQ392 |                                                                   |        |           |            |     |     |                  |
| 14        | 89        | 1187083           | spore coat polysaccharide biosynthesis protein C                  | -      | 0366      | 1015       | M   |     | non-synonymous   |
|           |           | 1197693           | phosphogluconate dehydratase                                      | edd    | 1100      | 1026       | EG  |     | non-synonymous   |
|           |           | 1200411           | glucose-6-phosphate 1-dehydrogenase                               | zwf    | 1101      | 1027       | G   |     | non-synonymous   |
| 15        | 91        | 1203651           | putative lipopolysaccharide biosynthesis protein                  | -      | 1105      | 1031       | M   |     | non-synonymous   |
|           |           | 1207649           | putative outer membrane protein                                   | -      | 1107      | 1034       | -   | hor | synonymous       |
|           |           | 1210318           | pyruvate flavodoxin oxidoreductase subunit alpha                  | porA   | 1110      | 1037       | C   |     | synonymous       |
| 16        | 94        | 1210945           | ferredoxin oxidoreductase beta subunit                            | porB   | 1111      | 1038       | C   |     | synonymous       |
|           |           | 1216199           | hypothetical protein                                              | -      | 1115      | 1042       | -   |     | non-synonymous   |
| 17        | 95        | 1219608           | gamma-glutamyltranspeptidase                                      | ggt    | 1118      | 1046       | E   |     | synonymous       |
|           |           | 1243538           | no annotation/ intergenic                                         |        |           |            |     |     | intergenic       |
| 18        | 96        | 1244795           | no annotation/ intergenic                                         |        |           |            |     |     | intergenic       |
|           |           | 1244954           | no annotation/ intergenic                                         |        |           |            |     |     | intergenic       |
| 19        | 97        | 1245489           | no annotation/ intergenic                                         |        |           |            |     |     | intergenic       |
|           |           | 1257928           | putative outer membrane protein                                   | -      | 1156      | 1083       | -   | hop | non-synonymous   |
| 20        | 98        | 1259000           | putative outer membrane protein                                   | -      | 1157      | 1084       | -   | hop | non-synonymous   |
|           |           | 1269777           | no annotation/ intergenic                                         |        |           |            |     |     | intergenic       |
| 21        | 99        | 1278754           | glucose/ galactose transporter                                    | gluP   | 1174      | 1101       | G   |     | synonymous       |
|           |           | 1279384           | hypothetical protein                                              | -      | 1175      | 1102       | R   |     | non-synonymous   |
| 22        | 100       | 1281948           | putative outer membrane function                                  | -      | 1177      | 1103       | -   | hop | non-synonymous   |
|           |           | 1289074           | no annotation/ intergenic                                         |        |           |            |     |     | intergenic       |
| 23        | 101       | 1303176           | elongation factor G                                               | fusA   | 1195      | 1118       | J   |     | synonymous       |
|           |           | 1316754           | transcription antitermination protein NusG                        | nusG   | 1203      | 1126       | K   |     | synonymous       |
| 24        | 102       | 1322600           | type II DNA modification enzyme (methyltransferase)               | M.HpyI | 1208      | 1131       | L   |     | synonymous       |
|           |           | 1324064           | O-serine acetyltransferase                                        | cysE   | 1210      | 1133       | E   |     | non-synonymous   |
| 25        | 103       | 1342558           | DNA polymerase III subunit delta'                                 | holB   | 1231      | 1152       | L   |     | synonymous       |
|           |           | 1364004           | putative peptide ABC transporter, ATP-binding protein             | -      | 1251      | 1172       | R   |     | non-synonymous   |
| 26        | 104       | 1390031           | tryptophan synthase subunit alpha                                 | trpA   | 1277      | 1198       | E   |     | synonymous       |
|           |           | 1437123           | putative outer membrane protein                                   | -      | 1342      | 1261       | -   | hop | synonymous       |
| 27        | 105       | 1447571           | type II DNA modification enzyme (methyltransferase)               | -      | 1352      | 1271       | L   |     | synonymous       |
|           |           | 1451354           | hypothetical protein                                              | -      | 1354      | 1272       | R   |     | non-synonymous   |
| 28        | 106       | 1469310           | rod shape-determining protein MreB                                | mreB   | 1373      | 1287       | D   |     | non-synonymous   |
|           |           | 1482965           | putative type III restriction enzyme                              | res_1  |           | 1297       | S   |     | synonymous       |
| 29        | 107       | 1485853           | no annotation/ intergenic                                         |        |           |            |     |     | intergenic       |
|           |           | 1510541           | hypothetical protein                                              | -      |           | 0928       | KL  |     | non-synonymous   |
| 30        | 108       | 1535257           | no annotation/ intergenic                                         |        |           |            |     |     | intergenic       |
|           |           | 1549909           | no annotation/ intergenic                                         |        |           |            |     |     | intergenic       |
| 31        | 109       | 1559283           | hypothetical protein                                              | -      | 1430      | 1323       | R   |     | synonymous       |
|           |           | 1563588           | no annotation/ intergenic                                         |        |           |            |     |     | intergenic       |
| 32        | 110       | 1569406           | hypothetical protein                                              | -      | 1437      | 1330       | -   |     | synonymous       |
|           |           | 1577407           | putative inner membrane protein translocase component YidC        | -      | 1450      | 1343       | U   |     | non-synonymous   |
| 33        | 111       | 1599375           | DNA polymerase I                                                  | polA   | 1470      | 1363       | L   |     | synonymous       |
|           |           | 1604226           | putative type II modification enzyme (methyltransferase)          | -      | 1472      | 1365       | V   |     | synonymous       |
| 34        | 112       | 1615479           | hypothetical protein                                              | -      | 1484      | 1377       | S   |     | synonymous       |
|           |           | 1626025           | UDP-N-acetylmuramoylalanyl-D-glutamate-2,6-diaminopimelate ligase | murE   | 1494      | 1387       | M   |     | synonymous       |
| 35        | 113       | 1633569           | putative component of cation transport for cbb3-type oxidase      | fixI   | 1503      | 1396       | P   |     | non-synonymous   |
|           |           | 1635696           | hypothetical protein                                              | -      | 1504      | 1397       | R   |     | non-synonymous   |
| 36        | 114       | 1647093           | transcription elongation factor NusA                              | nusA   | 1514      | 1407       | K   |     | synonymous       |
|           |           | 1647788           | hypothetical protein                                              | -      |           | 1408       | -   |     | synonymous       |

| SNPs         |              | Position in<br>NQ392 | Annotation <sup>a</sup> |      |               |                |     |     |                  |
|--------------|--------------|----------------------|-------------------------|------|---------------|----------------|-----|-----|------------------|
| No<br>NQ1707 | No<br>NQ4060 |                      | Description             | gene | HP-<br>number | jhp-<br>number | COG | OMP | type of mutation |

- a Annotation is based on an automatic annotation, generated with the Kodon software using the J99 annotation as a reference. The annotation of predicted ORFs with no homologue in J99 was done manually by means of BLAST searches. COG classifications are primarily based on J99 as of May 2010.

**Table S3: Isolated (non-clustered) single nucleotide polymorphisms (SNPs) in strain set NQ367/1671/4191. Positions refer to the position in the virtual genome of the first isolate NQ367.**

| SNPs      |               |                       | Annotation                                                            |                                         |           |            |      |     |                  |                |
|-----------|---------------|-----------------------|-----------------------------------------------------------------------|-----------------------------------------|-----------|------------|------|-----|------------------|----------------|
| No NQ1671 | No NQ4191     | Position in NQ367     | Description                                                           | gene                                    | HP-number | jhp-number | COG  | OMP | type of mutation |                |
| 1         | 1             | 11923                 | leucyl-tRNA synthetase                                                | leuS                                    | 1547      | 1452       | J    |     | non-synonymous   |                |
|           | 2             | 15829                 | hypothetical protein                                                  | -                                       | 1542      | 1457       | M    |     | non-synonymous   |                |
|           |               | 17286                 | transcription-repair coupling factor                                  | mfd                                     | 1541      | 1458       | LK   |     | synonymous       |                |
|           | 3             | 20440                 | ubiquinol cytochrome c oxidoreductase, cytochrome b subunit           | petB                                    | 1539      | 1460       | C    |     | non-synonymous   |                |
|           | 4             | 36296                 | hypothetical protein                                                  | -                                       | 1568      | 1476       | S    |     | synonymous       |                |
|           | 5             | 37173                 | hypothetical protein                                                  | -                                       | 1569      | 1477       | -    |     | non-synonymous   |                |
| 2         | 6             | 39285                 | regulatory protein DniR                                               | dniR                                    | 1572      | 1480       | M    |     | non-synonymous   |                |
|           | 7             | 45059                 | putative undecaprenyl-phosphate-alpha-N-acetylglucosaminyltransferase | wecA                                    | 1581      | 1488       | M    |     | non-synonymous   |                |
|           | 8             | 46436                 | pyridoxine 5'-phosphate synthase                                      | pdxJ                                    | 1582      | 1489       | H    |     | synonymous       |                |
|           | 9             | 49221                 | no annotation/ intergenic                                             |                                         |           |            |      |     | intergenic       |                |
|           | 10            | 55185                 | 2-dehydro-3-deoxyphosphooctonate aldolase                             | kdsA                                    | 0003      | 0003       | M    |     | non-synonymous   |                |
|           | 11            | 57528                 | pantoate-beta-alanine ligase                                          | panC                                    | 0006      | 0006       | H    |     | non-synonymous   |                |
|           | 12            | 59028                 | no annotation/ intergenic                                             |                                         |           |            |      |     | intergenic       |                |
|           | 13            | 60558                 | putative outer membrane protein                                       | -                                       | 0009      | 0007       | -    | hop | non-synonymous   |                |
|           | 14            | 111764                | no annotation/ intergenic                                             |                                         |           |            |      |     | intergenic       |                |
|           | 15            | 115135                | hypothetical protein                                                  | -                                       | 0060      | 0054       | -    |     | non-synonymous   |                |
| 3         | 16            | 145641                | 5'-methylthioadenosine/S-adenosylhomocysteine nucleosidase            | -                                       | 0089      | 0082       | F    |     | synonymous       |                |
|           | 17            | 154817                | methyl-accepting chemotaxis protein (MCP)                             | -                                       | 0099      | 0091       | NT   |     | synonymous       |                |
|           | 18            | 159238                | methyl-accepting chemotaxis protein (MCP)                             | -                                       | 0103      | 0095       | NT   |     | non-synonymous   |                |
|           | 19            | 160033                | methyl-accepting chemotaxis protein (MCP)                             | -                                       | 0103      | 0095       | NT   |     | non-synonymous   |                |
|           | 4             | 20                    | 184348                                                                | threonyl-tRNA synthetase                | thrS      | 0123       | 0113 | J   |                  | non-synonymous |
|           | 5             | 21                    | 188710                                                                | hypothetical protein                    | -         | 0130       | 0119 | -   |                  | non-synonymous |
|           | 5             |                       | 189625                                                                | no annotation/ intergenic               |           |            |      |     | intergenic       |                |
|           | 6             | <b>Pseudo-cluster</b> | 199784                                                                | no annotation/ intergenic               |           |            |      |     |                  | intergenic     |
|           | 7             |                       | 206396                                                                | putative cytochrome oxidase (CBB3-type) | fixQ      | 0146       | 0134 | O   |                  | synonymous     |
|           | 8             |                       | 208156                                                                | hypothetical protein                    | -         | 0149       | 0137 | -   |                  | non-synonymous |
| 9         | 22            | 212467                | phosphopyruvate hydratase                                             | eno                                     | 0154      | 0142       | G    |     | non-synonymous   |                |
|           | 23            | 289302                | hypothetical protein                                                  | -                                       | 0228      | 0213       | P    |     | synonymous       |                |
|           | 24            | 290330                | outer membrane protein/ porin                                         | hopA                                    | 0229      | 0214       | -    | hop | synonymous       |                |
|           | 25            | 295089                | hypothetical protein                                                  | -                                       | 0233      | 0218       | E    |     | synonymous       |                |
| 10        | 26            | 311374                | ABC transporter, ATP-binding protein                                  | -                                       | 0250      | 0235       | R    |     | non-synonymous   |                |
|           | 27            | 318073                | hypothetical protein                                                  | -                                       | 0257      | 0241       | S    |     | non-synonymous   |                |
|           | 28            | 345592                | hypothetical protein                                                  | -                                       | 0284      | 0269       | M    |     | synonymous       |                |
|           | 29            | 347181                | hypothetical protein                                                  | -                                       | 0285      | 0270       | J    |     | synonymous       |                |
| 11        | <b>CNP 37</b> | 356364                | putative vacuolating cytotoxin (VacA) paralog                         | -                                       | 0289      | 0274       | N    |     | non-synonymous   |                |
|           | 30            | 378619                | hypothetical protein                                                  | -                                       | 0309      | 0294       | R    |     | synonymous       |                |
|           | 31            | 385238                | arginyl-tRNA synthetase                                               | argS                                    | 0319      | 0302       | J    |     | non-synonymous   |                |
|           | 32            | 388938                | poly E-rich protein                                                   | -                                       | 0322      | 0305       | -    |     | non-synonymous   |                |
|           | 33            | 392866                | CMP-N-acetylneuraminic acid synthetase (neuA)                         | -                                       | 0326      | 0309       | M    |     | synonymous       |                |
|           | 34            | 405014                | no annotation/ intergenic                                             |                                         |           |            |      |     | intergenic       |                |
|           | 35            | 420138                | hypothetical protein                                                  | -                                       | 1089      | 0336       | L    |     | non-synonymous   |                |
|           | 36            | 420533                | hypothetical protein                                                  | -                                       | 1089      | 0336       | L    |     | synonymous       |                |
|           | 37            | 421372                | hypothetical protein                                                  | -                                       | 1089      | 0336       | L    |     | non-synonymous   |                |
|           | 38            | 427213                | putative outer membrane protein                                       | -                                       | 1083      | 0342       | -    | hof | non-synonymous   |                |

| SNPs         |              |                      | Annotation                                                                                |             |               |                |      |          |                  |
|--------------|--------------|----------------------|-------------------------------------------------------------------------------------------|-------------|---------------|----------------|------|----------|------------------|
| No<br>NQ1671 | No<br>NQ4191 | Position in<br>NQ367 | Description                                                                               | gene        | HP-<br>number | jhp-<br>number | COG  | OMP      | type of mutation |
| 12           | 39           | 433191               | hypothetical protein                                                                      | -           | 1078          | 0347           | -    |          | non-synonymous   |
|              |              |                      | putative ribosomal protein L11                                                            |             |               |                |      |          |                  |
|              | 40           | 443110               | methyltransferase                                                                         | prmA        | 1068          | 0357           | J    |          | non-synonymous   |
|              | 41           | 492297               | 7-alpha-hydroxysteroid dehydrogenase                                                      | -           | 1014          | 0409           | IQR  |          | synonymous       |
|              | 42           | 500479               | type I restriction enzyme modification subunit<br>fragment of type I restriction enzyme R | hsdM_1      | 0463          | 0415           | V    |          | non-synonymous   |
|              | 43           | 501865               | protein (hsdR)<br>glutathione-regulated potassium-efflux system                           | -           | 0464          | 0416           | V    |          | synonymous       |
|              | 44           | 512195               | protein                                                                                   | kefB        | 0471          | 0423           | P    |          | non-synonymous   |
|              | 45           | 540177               | putative transporter                                                                      | -           | 0498          | 0450           | R    |          | synonymous       |
|              | 46           | 542396               | putative phospholipase A1                                                                 | pldA        | 0499          | 0451           | M    |          | synonymous       |
|              | 47           | 544434               | DNA gyrase subunit B                                                                      | gyrB        | 0501          | 0453           | L    |          | synonymous       |
| 13           | 48           | 547876               | no annotation/ intergenic<br>ATP-dependent protease ATP-binding subunit                   |             |               |                |      |          | intergenic       |
|              | 49           | 559924               | HslU                                                                                      | hslU        | 0516          | 0465           | O    |          | synonymous       |
|              | 50           | 571318               | no annotation/ intergenic                                                                 |             |               |                |      |          | intergenic       |
|              | 51           | 594556               | cag island protein                                                                        | cagC        | 0546          | 0494           | -    |          | non-synonymous   |
|              | add. diff.   | 595530               | no annotation/ intergenic<br>cag island protein, cytotoxicity associated                  |             |               |                |      |          | intergenic       |
|              | 52           | 595993               | immunodominant antigen<br>cag island protein, cytotoxicity associated                     | cagA        | 0547          | 0495           | -    |          | non-synonymous   |
|              | 53           | 599076               | immunodominant antigen                                                                    | cagA        | 0547          | 0495           | -    |          | non-synonymous   |
|              | 54           | 612916               | hypothetical protein                                                                      | -           | 0565          | 0512           | S    |          | synonymous       |
|              | 55           | 642423               | hypothetical protein                                                                      | -           | 0595          | 0542           | O    |          | non-synonymous   |
|              | 14           | 56                   | 650958                                                                                    | flagellin A | flaA          | 0601           | 0548 | N        |                  |
| 15           | 57           | 653984               | hypothetical protein                                                                      | -           | 0605          | 0552           | MU   | family 5 | non-synonymous   |
| 16           | 58           | 667355               | putative vacuolating cytotoxin (VacA) paralog                                             | -           | 0610          | 0556           | N    |          | non-synonymous   |
|              | 59           | 669009               | putative vacuolating cytotoxin (VacA) paralog<br>putative lipopolysaccharide biosynthesis | -           | 0610          | 0556           | N    |          | non-synonymous   |
|              | 60           | 676811               | protein                                                                                   | -           | 0619          | 0563           | M    |          | non-synonymous   |
|              | 61           | 687422               | no annotation/ intergenic                                                                 |             |               |                |      |          | intergenic       |
|              | 62           | 717227               | hypothetical protein                                                                      | -           | 0656          | 0601           | HR   |          | synonymous       |
|              | 63           | 725724               | hypothetical protein                                                                      | -           | 0664          | 0609           | -    |          | non-synonymous   |
|              | 64           | 733564               | no annotation/ intergenic                                                                 |             |               |                |      |          | intergenic       |
|              | 65           | 734893               | aspartate aminotransferase                                                                | aspB        | 0672          | 0615           | E    |          | synonymous       |
|              | 66           | 750460               | hypothetical protein                                                                      | -           | 0688          | 0628           | L    |          | non-synonymous   |
|              | 67           | 760435               | hypothetical protein                                                                      | -           | 0693          | 0693           | -    |          | synonymous       |
| 17           | 68           | 763421               | acetyl-coA acetyltransferase                                                              | thl         | 0690          | 0638           | I    |          | synonymous       |
|              | 69           | 766721               | DNA gyrase subunit A                                                                      | gyrA        | 0701          | 0641           | L    |          | non-synonymous   |
|              | CNP 66       | 787687               | putative outer membrane protein                                                           | -           | 0725          | 0662           | -    | hop      | non-synonymous   |
|              | 17           | 808881               | D-alanyl-D-alanine-adding enzyme                                                          | murF        | 0740          | 0677           | M    |          | non-synonymous   |
|              | 70           | 819323               | flagellar protein FlaG                                                                    | -           | 0751          | 0688           | N    |          | non-synonymous   |
|              | 71           | 821975               | flagellar protein FliS                                                                    | fliS        | 0753          | 0690           | NUO  |          | non-synonymous   |
|              | 18           | 827021               | phosphodiesterase                                                                         | -           | 0760          | 0697           | R    |          | synonymous       |
|              | 72           | 829014               | hypothetical protein                                                                      | -           | 0762          | 0699           | -    |          | synonymous       |
|              | 73           | 830553               | hypothetical protein                                                                      | -           | 0764          | 0701           | R    |          | non-synonymous   |
|              | 19           | 838927               | N-acetylmuramoyl-L-alanine amidase<br>guanosine-3',5'-bis(diphosphate) 3'-                | amiA        | 0772          | 0709           | M    |          | synonymous       |
| 20           | 74           | 842877               | pyrophosphohydrolase                                                                      | spoT        | 0775          | 0712           | TK   |          | non-synonymous   |
|              | 75           | 852693               | outer-membrane lipoprotein carrier protein                                                | lolA        | 0785          | 0722           | M    |          | non-synonymous   |
|              | 76           | 865702               | putative outer membrane protein<br>neuraminyllactose-binding hemagglutinin                | -           | 0796          | 0732           | -    | hor      | non-synonymous   |
|              | 77           | 866581               | precursor                                                                                 | hpaA        | 0797          | 0733           | -    |          | synonymous       |
|              | 78           | 868224               | molybdenum cofactor biosynthesis protein                                                  | mogA        | 0799          | 0735           | H    |          | synonymous       |
|              | 79           | 876036               | 4'-phosphopantetheinyl transferase                                                        | acpS        | 0808          | 0744           | I    |          | synonymous       |
|              | 80           | 878907               | hypothetical protein                                                                      | -           | 0812          | 0748           | S    |          | synonymous       |
|              | 81           | 879397               | no annotation/ intergenic                                                                 |             |               |                |      |          | intergenic       |

| SNPs         |                           |                      | Annotation                                                                            |                                                   |               |                |      |     |                  |                |
|--------------|---------------------------|----------------------|---------------------------------------------------------------------------------------|---------------------------------------------------|---------------|----------------|------|-----|------------------|----------------|
| No<br>NQ1671 | No<br>NQ4191              | Position in<br>NQ367 | Description                                                                           | gene                                              | HP-<br>number | jhp-<br>number | COG  | OMP | type of mutation |                |
| 21           | 82                        | 908468               | phosphomethylpyrimidine kinase<br>putative ABC transporter, ATP-binding<br>protein    | thiD                                              | 0844          | 0782           | H    |     | synonymous       |                |
|              | 83                        | 917662               |                                                                                       | -                                                 | 0853          | 0789           | R    |     | non-synonymous   |                |
|              | 84                        | 922779               | ADP-L-glycero-D-mannoheptose-6-epimerase                                              | gmhD                                              | 0859          | 0793           | MG   |     | synonymous       |                |
|              |                           | 933086               | CDP-diacylglycerol pyrophosphatase                                                    | cdh                                               | 0871          | 0805           | I    |     | non-synonymous   |                |
|              | 85                        | 939808               | holliday junction resolvase                                                           | ruvC                                              | 0877          | 0811           | L    |     | non-synonymous   |                |
| 22           |                           | 940452               | hypothetical protein                                                                  | -                                                 | 0879          | 0812           | S    |     | synonymous       |                |
|              | 86                        | 949124               | vacuolating cytotoxin                                                                 | vacA                                              | 0887          | 0819           | -    |     | non-synonymous   |                |
| 23           | 87                        | 951127               | vacuolating cytotoxin                                                                 | vacA                                              | 0887          | 0819           | -    |     | synonymous       |                |
|              | <b>Contig-<br/>border</b> | 959262               | outer membrane protein-adhesin                                                        | babA                                              | 1243          | 0833           | -    | hop | non-synonymous   |                |
|              | 88                        | 977307               | outer membrane protein/porin                                                          | hopB                                              | 0913          | 0849           | -    | hop | non-synonymous   |                |
|              | 89                        | 979898               | putative outer membrane protein                                                       | -                                                 | 0914          | 0850           | -    | hof | non-synonymous   |                |
|              | 90                        | 983705               | no annotation/ intergenic                                                             |                                                   |               |                |      |     | intergenic       |                |
| 24           |                           | 994244               | putative vacuolating cytotoxin (VacA) paralog                                         | -                                                 | 0922          | 0856           | N    |     | synonymous       |                |
|              | 91                        | 999029               | recombination protein RecR                                                            | recR                                              | 0925          | 0859           | L    |     | non-synonymous   |                |
| 25           | 92                        | 1002625              | geranyltransferase                                                                    | ispA                                              | 0929          | 0864           | H    |     | non-synonymous   |                |
|              | 93                        | 1004106              | hypothetical protein                                                                  | -                                                 | 0932          | 0866           | -    |     | synonymous       |                |
|              | 94                        | 1006555              | no annotation/ intergenic                                                             |                                                   |               |                |      |     | intergenic       |                |
|              | 95                        | 1023274              | hypothetical protein                                                                  | -                                                 | 0953          | 0887           | -    |     | non-synonymous   |                |
|              |                           | 1023617              | no annotation/ intergenic                                                             |                                                   |               |                |      |     | intergenic       |                |
|              | 96                        | 1023707              | putative aldehyde dehydrogenase                                                       | -                                                 | 0954          | 0888           | C    |     | non-synonymous   |                |
|              | 97                        | 1052173              | no annotation/ intergenic                                                             |                                                   |               |                |      |     | intergenic       |                |
|              | 98                        | 1054107              | hypothetical protein                                                                  | -                                                 |               | 0914           | -    |     | synonymous       |                |
|              |                           | 99                   | 1066885                                                                               | hypothetical protein                              | HPP12_0455    |                |      | -   |                  | non-synonymous |
|              |                           | 100                  | 1069023                                                                               | no annotation/ intergenic                         |               |                |      |     |                  | intergenic     |
| 26           | 101                       | 1070859              | hypothetical protein HP1004                                                           | -                                                 | 1004          |                | U    |     | synonymous       |                |
|              |                           | 1077997              | hypothetical protein                                                                  | -                                                 |               | 0928           | KL   |     | synonymous       |                |
|              | 102                       | 1081350              | hypothetical protein                                                                  | -                                                 |               | 0928           | KL   |     | synonymous       |                |
|              | 103                       | 1099954              | putative polysaccharide biosynthesis protein                                          | -                                                 | 0421          | 0963           | M    |     | non-synonymous   |                |
|              | 104                       | 1103854              | methionyl-tRNA synthetase                                                             | metG                                              | 0417          | 0967           | J    |     | non-synonymous   |                |
| 27           | 105                       | 1122340              | 30S ribosomal protein S1                                                              | rpsA                                              | 0399          | 0982           | J    |     | non-synonymous   |                |
|              |                           | 1125061              | D-3-phosphoglycerate dehydrogenase                                                    | serA                                              | 0397          | 0984           | HE   |     | non-synonymous   |                |
| 28           |                           | 1126527              | hypothetical protein                                                                  | -                                                 | 0396          | 0985           | H    |     | synonymous       |                |
|              | 106                       | 1160510              | protein-L-isoaspartate O-methyltransferase                                            | pcm                                               | 0363          | 1017           | O    |     | non-synonymous   |                |
| 29           | 107                       | 1163812              | no annotation/ intergenic                                                             |                                                   |               |                |      |     | intergenic       |                |
|              | 30                        | 1177716              | hypothetical protein                                                                  | -                                                 | 1106          | 1033           | -    |     | synonymous       |                |
| 31           | 108                       | 1203311              | F0F1 ATP synthase subunit gamma                                                       | atpG                                              | 1133          | 1061           | C    |     | non-synonymous   |                |
|              | 109                       | 1205901              | F0F1 ATP synthase subunit B                                                           | atpF                                              | 1136          | 1064           | C    |     | synonymous       |                |
| 32           | 110                       | 1218988              | no annotation/ intergenic                                                             |                                                   |               |                |      |     | intergenic       |                |
|              | 111                       | 1227398              | putative outer membrane protein                                                       | -                                                 | 1156          | 1083           | -    | hop | synonymous       |                |
|              | 112                       | 1230665              | putative outer membrane protein                                                       | -                                                 | 1157          | 1084           | -    | hop | synonymous       |                |
|              | 113                       | 1231365              | putative outer membrane protein                                                       | -                                                 | 1157          | 1084           | -    | hop | non-synonymous   |                |
|              | 114                       | 1237196              | putative thioredoxin reductase                                                        | trxB_2                                            | 1164          | 1091           | O    |     | non-synonymous   |                |
| 33           | 115                       | 1241924              | putative outer membrane protein<br>amino acid ABC transporter, ATP-binding<br>protein | -                                                 | 1167          | 1094           | -    | hof | non-synonymous   |                |
|              | 116                       | 1246888              |                                                                                       | -                                                 | 1171          | 1098           | E    |     | non-synonymous   |                |
|              | 117                       | 1257992              | phosphopentomutase                                                                    | deoB                                              | 1179          | 1105           | G    |     | non-synonymous   |                |
|              | 118                       | 1270337              | ADP-heptose-LPS-heptosyltransferase II                                                | waaF                                              | 1191          | 1116           | M    |     | synonymous       |                |
|              | 34                        | <b>CNP 126</b>       | 1278580                                                                               | DNA-directed RNA polymerase subunit<br>beta/beta' | rpoB          | 1198           | 1121 | K   |                  | non-synonymous |
| 119          |                           | 1283288              | DNA-directed RNA polymerase subunit<br>beta/beta'                                     | rpoB                                              | 1198          | 1121           | K    |     | non-synonymous   |                |
| 120          |                           | 1284040              | 50S ribosomal protein L7/L12                                                          | rpIL                                              | 1199          | 1122           | J    |     | synonymous       |                |

| SNPs         |              |                      | Annotation                                                                          |        |               |                |     |          |                  |
|--------------|--------------|----------------------|-------------------------------------------------------------------------------------|--------|---------------|----------------|-----|----------|------------------|
| No<br>NQ1671 | No<br>NQ4191 | Position in<br>NQ367 | Description                                                                         | gene   | HP-<br>number | jhp-<br>number | COG | OMP      | type of mutation |
|              | 121          | 1286374              | transcription antitermination protein NusG<br>preprotein translocase subunit SecE - | nusG   | 1203          | 1126           | K   |          | synonymous       |
|              | 122          | 1286689              | HPAG1_1143                                                                          | secE   |               |                | U   |          | non-synonymous   |
|              | 123          | 1297830              | hypothetical protein                                                                | -      | 1214<br>1215/ | 1137           | R   |          | non-synonymous   |
|              | 124          | 1299778              | putative role in outer membrane permeability                                        | imp    | 1216          | 1138           | M   |          | non-synonymous   |
|              | 125          | 1317555              | carbamoyl phosphate synthase small subunit                                          | carA   | 1237          | 1158           | EF  |          | non-synonymous   |
|              | 126          | 1335123              | hypothetical protein                                                                | -      | 1252          | 1173           | E   |          | non-synonymous   |
|              | 127          | 1348212              | NADH dehydrogenase subunit H                                                        | nuoH   | 1267          | 1188           | C   |          | non-synonymous   |
|              | 128          | 1354215              | NADH dehydrogenase subunit N                                                        | nuoN   | 1273          | 1194           | C   |          | non-synonymous   |
|              | 129          | 1371435              | hypothetical protein                                                                | -      | 1288          | 1208           | -   |          | non-synonymous   |
|              | 130          | 1374578              | 50S ribosomal protein L17                                                           | rplQ   | 1292          | 1212           | J   |          | non-synonymous   |
|              | 131          | 1376505              | 30S ribosomal protein S11                                                           | rpsK   | 1295          | 1215           | J   |          | non-synonymous   |
| 35           |              | 1382435              | 50S ribosomal protein L5                                                            | rplE   | 1307          | 1227           | J   |          | non-synonymous   |
|              | 132          | 1385746              | 50S ribosomal protein L2                                                            | rplB   | 1316          | 1236           | J   |          | synonymous       |
| 36           |              | 1389178              | hypothetical protein                                                                | -      | 1321          | 1241           | R   |          | non-synonymous   |
|              | 133          | 1393395              | hypothetical protein                                                                | -      | 1327          | 1247           | MU  | family 5 | non-synonymous   |
|              | 134          | 1394004              | hypothetical protein                                                                | -      | 1327          | 1247           | MU  | family 5 | non-synonymous   |
|              | 135          | 1405758              | no annotation/ intergenic                                                           |        |               |                |     |          | intergenic       |
|              | 136          | 1429530              | DNA transfer protein                                                                | comEC  | 1361          | 1279           | R   |          | non-synonymous   |
|              | 137          | 1455983              | type I restriction enzyme (restriction subunit)                                     | hsdR_3 | 1402          | 1424           | V   |          | non-synonymous   |
| 37           |              | 1461826              | no annotation/ intergenic                                                           |        |               |                |     |          | intergenic       |
| 38           |              | 1465362              | hypothetical protein                                                                | -      | 1530          | 1418           | F   |          | synonymous       |
|              | 140          | 1468129              | hypothetical protein                                                                | -      | 1527          | 1416           | -   |          | synonymous       |
|              | 141          | 1473098              | type III DNA modification enzyme<br>(methyltransferase)                             | mod_2  | 1522          | 1411           | L   |          | synonymous       |
|              | 142          | 1477319              | type III restriction enzyme                                                         | res_2  | 1521          | 1410           | V   |          | synonymous       |
|              | 143          | 1481089              | putative type II DNA modification enzyme<br>(methyltransferase)                     | -      |               | 1409           | V   |          | non-synonymous   |
|              | 144          | 1484702              | selenocysteine synthase                                                             | selA   | 1513          | 1406           | E   |          | non-synonymous   |
|              | 145          | 1490103              | ferredoxin-like protein                                                             | -      | 1508          | 1401           | C   |          | non-synonymous   |
|              | 146          | 1490533              | ferredoxin-like protein                                                             | -      | 1508          | 1401           | C   |          | non-synonymous   |
|              | 147          | 1492251              | sodium/ glutamate symporter                                                         | gltS   | 1506          | 1399           | E   |          | non-synonymous   |
|              | 148          | 1495962              | putative component of cation transport for<br>cbb3-type oxidase                     | fixI   | 1503          | 1396           | P   |          | non-synonymous   |
| 39           |              | 1497932              | putative outer membrane protein                                                     | -      | 1501          | 1394           | -   | hor      | synonymous       |
|              | 149          | 1503338              | transaldolase                                                                       | tal    | 1495          | 1388           | G   |          | non-synonymous   |
|              | 150          | 1512694              | hypothetical protein                                                                | -      | 1486          | 1379           | -   |          | synonymous       |
|              | 151          | 1513523              | hypothetical protein                                                                | -      | 1486          | 1379           | -   |          | non-synonymous   |
|              | 152          | 1527063              | predicted ORF/ putative methylase                                                   |        |               |                | -   |          | non-synonymous   |
| 40           |              | 1533559              | branched-chain amino acid aminotransferase                                          | ilvE   | 1468          | 1361           | EH  |          | synonymous       |
|              | 154          | 1560192              | hypothetical protein                                                                | -      | 1409          | 1301           | S   |          | synonymous       |
|              | 155          | 1590101              | hypothetical protein                                                                | -      | 1438          | 1331           | -   |          | synonymous       |
|              | 156          | 1595407              | no annotation/ intergenic                                                           |        |               |                |     |          | intergenic       |
|              | 157          | 1597132              | putative ribonuclease N                                                             | rbn    | 1407          | 1299           | S   |          | non-synonymous   |

a Annotation is based on an automatic annotation, generated with the Kodon software using the J99 annotation as a reference. The annotation of predicted ORFs with no homologue in J99 was done manually by means of BLAST searches. COG classifications are primarily based on J99 as of May 2010.

**Table S4: Clusters of nucleotide polymorphisms (CNPs)/ imports in strain pair NQ392/1707. Positions refer to the position in the virtual genome of the first isolate NQ392.**

| No | Position in NQ392 |         | Corresponding import in NQ4060 | Annotation <sup>a</sup>                                      |        |           |            |     |          |               |
|----|-------------------|---------|--------------------------------|--------------------------------------------------------------|--------|-----------|------------|-----|----------|---------------|
|    | start             | end     |                                | Description                                                  | gene   | HP-number | jhp-number | COG | OMP      | Import length |
| 1  | 78038             | 78162   |                                | penicillin-binding protein                                   | -      | 1565      | 1473       | M   |          | 125           |
| 2  | 268448            | 268700  |                                | hypothetical protein                                         | -      | 0170      | 0156       | -   |          | 253           |
| 3  | 845988            | 846022  |                                | putative outer membrane protein                              | -      | 0725      | 0662       | -   | hop      | 35            |
| 4  | 846387            | 846389  | CNP 22                         | putative outer membrane protein                              | -      | 0725      | 0662       | -   | hop      | 3             |
| 5  | 846996            | 847011  | CNP 23                         | putative outer membrane protein                              | -      | 0725      | 0662       | -   | hop      | 16            |
| 6  | 913426            | 913629  | CNP 24 (partially)             | anti-codon nuclease masking agent                            | prpB   | 0790      |            | V   |          | 204           |
| 7  | 1355279           | 1355281 |                                | outer membrane protein-adhesin                               | babB   | 0896      | 1164       | -   | hop      | 3             |
| 8  | 1616862           | 1616866 |                                | hypothetical protein                                         | -      | 1486      | 1379       | -   |          | 5             |
| 9  | 1619767           | 1621653 |                                | lipase-like protein                                          | -      | 1489      | 1382       | MU  |          | 1887          |
|    |                   |         |                                | hypothetical protein                                         | -      | 1490      | 1383       | R   |          |               |
| 10 | 1621866           | 1622096 |                                | hypothetical protein                                         | -      | 1490      | 1383       | R   |          | 231           |
| 11 | 1622374           | 1622436 |                                | phosphate permease                                           | -      | 1491      | 1384       | P   |          | 63            |
| 12 | 1622646           | 1623336 |                                | phosphate permease                                           | -      | 1491      | 1384       | P   |          | 691           |
| 13 | 1639547           | 1639550 |                                | ferredoxin-like protein                                      | -      | 1508      | 1401       | C   |          | 4             |
| 14 | 1644421           | 1644864 |                                | putative iron regulated outer membrane protein               | frpB_3 | 1512      | 1405       | P   | family 4 | 444           |
| 15 | 1645672           | 1645677 |                                | selenocysteine synthase                                      | selA   | 1513      | 1406       | E   |          | 6             |
| 16 | 1650888           | 1651023 |                                | putative type II DNA modification enzyme (methyltransferase) | -      |           | 1409       | V   |          | 136           |

<sup>a</sup> Annotation is based on an automatic annotation, generated with the Kodon software using the J99 annotation as a reference. The annotation of predicted ORFs with no homologue in J99 was done manually by means of BLAST searches. COG classifications are primarily based on J99 as of May 2010.



**Table S5: Clusters of nucleotide polymorphisms (CNPs)/ imports in strain pair NQ367/1671. Positions refer to the position in the virtual genome of the first isolate NQ367.**

| No | Position in NQ367 |         | Corresponding import in NQ4191 | Annotation <sup>a</sup><br>Description                                         | gene                | HP-number            | jhp-number           | COG         | OMP      | Import length |
|----|-------------------|---------|--------------------------------|--------------------------------------------------------------------------------|---------------------|----------------------|----------------------|-------------|----------|---------------|
|    | start             | end     |                                |                                                                                |                     |                      |                      |             |          |               |
| 1  | 184565            | 184568  | CNP 15                         | translation initiation factor IF-3                                             | infC                | 0124                 | 0114                 | J           |          | 4             |
| 2  | 184985            | 185277  | CNP 16                         | translation initiation factor IF-3<br>50S ribosomal protein L35                | infC<br>rpmI        | 0124<br>0125         | 0114<br>0115         | J<br>J      |          | 293           |
| 3  | 185526            | 186814  | CNP 17                         | 50S ribosomal protein L20<br>putative outer membrane protein                   | rplT<br>-           | 0126<br>0127         | 0116<br>0117         | J<br>-      | hor      | 1289          |
| 4  | 200401            | 200941  | CNP 19 (partially)             | L-lactate permease                                                             | lldp_2              | 0141                 | 0129                 | C           |          | 541           |
| 5  | 201337            | 203173  | CNP 20 (partially)             | L-lactate permease<br>DNA glycosylase MutY<br>hypothetical protein             | lldp_2<br>mutY<br>- | 0141<br>0142<br>0143 | 0129<br>0130<br>0131 | C<br>L<br>P |          | 1837          |
| 6  | 203395            | 203470  | CNP 21 (partially)             | hypothetical protein                                                           | -                   | 0143                 | 0131                 | P           |          | 76            |
| 7  | 207219            | 207815  | CNP22                          | cytochrome oxidase (CBB3-type)<br>hypothetical protein<br>hypothetical protein | fixP<br>-<br>-      | 0147<br>0148<br>0149 | 0135<br>0136<br>0137 | C<br>-<br>- |          | 597           |
| 8  | 216997            | 217075  | CNP23(partially)               | hypothetical protein                                                           | -                   | 0160                 | 0148                 | R           |          | 79            |
| 9  | 517734            | 517776  | -                              | putative outer membrane protein                                                | -                   | 0923                 | 0857                 | -           | hop      | 43            |
| 10 | 597023            | 597257  | CNP 53 (partially)             | cag island protein, cytotoxicity associated immunodominant antigen             | cagA                | 0547                 | 0495                 | -           |          | 235           |
| 11 | 618437            | 619427  | -                              | leucyl aminopeptidase                                                          | pepA                | 0570                 | 0517                 | E           |          | 991           |
| 12 | 652785            | 653327  | -                              | uroporphyrinogen decarboxylase                                                 | hemE                | 0604                 | 0551                 | H           |          | 543           |
| 13 | 653538            | 653775  | -                              | uroporphyrinogen decarboxylase<br>hypothetical protein                         | hemE<br>-           | 0604<br>0605         | 0551<br>0552         | H<br>MU     | family 5 | 238           |
| 14 | 654404            | 654537  | -                              | hypothetical protein                                                           | -                   | 0605                 | 0552                 | MU          | family 5 | 134           |
| 15 | 913449            | 913479  | -                              | anti-codon nuclease masking agent (prrB)                                       |                     | 0790                 |                      | V           |          | 31            |
| 16 | 924377            | 924379  | CNP 85                         | hypothetical protein                                                           | -                   | 0861                 | 0795                 | S           |          | 3             |
| 17 | 936705            | 937184  | CNP 87 (partially)             | catalase                                                                       | katA                | 0875                 | 0809                 | P           |          | 480           |
| 18 | 958445            | 958446  | -                              | outer membrane protein-adhesin                                                 | babA                | 1243                 | 0833                 | -           | hop      | 2             |
| 19 | 1434040           | 1434055 | CNP 157                        | putative transcriptional regulator                                             | -                   | 1365                 | 1283                 | TK          |          | 16            |
| 20 | 1434393           | 1434430 | CNP 158                        | no annotation/ intergenic                                                      |                     |                      |                      |             |          | 38            |
| 21 | 1466158           | 1466254 | -                              | chromosomal replication initiator protein                                      | dnaA                | 1529                 | 1417                 | L           |          | 97            |
| 22 | 1468776           | 1468987 | CNP 165                        | exodeoxyribonuclease III                                                       | exoA                | 1526                 | 1415                 | L           |          | 212           |
| 23 | 1469762           | 1469768 | -                              | hypothetical protein                                                           | -                   | 1525                 | 1414                 | -           |          | 7             |
| 24 | 1470071           | 1470311 | -                              | hypothetical protein<br>hypothetical protein                                   | -<br>-              | 1525<br>1524         | 1414<br>1413         | -<br>-      |          | 241           |

| No | Position in NQ367 |         | Corresponding import in NQ4191 | Annotation <sup>a</sup>                              |       |           |            |     |     |               |
|----|-------------------|---------|--------------------------------|------------------------------------------------------|-------|-----------|------------|-----|-----|---------------|
|    | start             | end     |                                | Description                                          | gene  | HP-number | jhp-number | COG | OMP | Import length |
| 25 | 1470536           | 1471306 | -                              | ATP-dependent DNA helicase RecG                      | recG  | 1523      | 1412       | LK  |     | 771           |
| 26 | 1471872           | 1472503 | -                              | ATP-dependent DNA helicase RecG                      | recG  | 1523      | 1412       | LK  |     | 632           |
|    |                   |         |                                | type III DNA modification enzyme (methyltransferase) | mod_2 | 1522      | 1411       | L   |     |               |
| 27 | 1473098           | 1473743 | SNP 141                        | type III DNA modification enzyme (methyltransferase) | mod_2 | 1522      | 1411       | L   |     | 646           |

a Annotation is based on an automatic annotation, generated with the Kodon software using the J99 annotation as a reference. The annotation of predicted ORFs with no homologue in J99 was done manually by means of BLAST searches. COG classifications are primarily based on J99 as of May 2010.

**Table S6: Isolated (non-clustered) single nucleotide polymorphisms (SNPs) in strain pair NQ315/1712. Positions refer to the position in the virtual genome of the first isolate NQ315.**

| No | Position in NQ315 | Annotation <sup>a</sup>                                    |      | HP-number     | jhp-number | COG | OMP family | type of mutation |
|----|-------------------|------------------------------------------------------------|------|---------------|------------|-----|------------|------------------|
|    |                   | Description                                                | gene |               |            |     |            |                  |
| 1  | 17094             | hypothetical protein                                       | -    | 1587          | 1493       | S   |            | non-synonymous   |
| 2  | 19154             | no annotation/ intergenic                                  |      |               |            |     |            | intergenic       |
| 3  | 27657             | no annotation/ intergenic                                  |      |               |            |     |            | intergenic       |
| 4  | 32405             | hypothetical protein                                       | -    | 0013          | 0011       | J   |            | synonymous       |
| 5  | 52228             | hypothetical protein                                       | -    | 0031          | 0027       | -   |            | non-synonymous   |
| 6  | 62695             | GDP-D-mannose dehydratase                                  | gmd  | 0044          | 0038       | M   |            | non-synonymous   |
| 7  | 84409             | hypothetical protein                                       | -    | 0065          | 0060       | -   |            | non-synonymous   |
| 8  | 89517             | urease accessory protein UreE                              | ureE | 0070          | 0065       | O   |            | synonymous       |
| 9  | 93094             | no annotation/ intergenic                                  |      |               |            |     |            | intergenic       |
| 10 | 107925            | RNA polymerase sigma factor RpoD                           | rpoD | 0088          | 0081       | K   |            | synonymous       |
| 11 | 110372            | 5'-methylthioadenosine/S-adenosylhomocysteine nucleosidase | -    | 0089          | 0082       | F   |            | synonymous       |
| 12 | 110659            | 5'-methylthioadenosine/S-adenosylhomocysteine nucleosidase | -    | 0089          | 0082       | F   |            | non-synonymous   |
| 13 | 115841            | 2-hydroxyacid dehydrogenase                                | -    | 0096          | 0088       | CHR |            | non-synonymous   |
| 14 | 120895            | methyl-accepting chemotaxis protein (MCP)                  | -    | 0099          | 0091       | NT  |            | synonymous       |
| 15 | 124771            | methyl-accepting chemotaxis protein (MCP)                  | -    | 0103          | 0095       | NT  |            | non-synonymous   |
| 16 | 127177            | 2',3'-cyclic-nucleotide 2'-phosphodiesterase               | cpdB | 0104          | 0096       | F   |            | non-synonymous   |
| 17 | 150410            | putative outer membrane protein                            | -    | 0127          | 0117       | -   | hor        | non-synonymous   |
| 18 | 152154            | hypothetical protein                                       | -    | 0130          | 0119       | -   |            | non-synonymous   |
| 19 | 165858            | DNA glycosylase MutY                                       | mutY | 0142          | 0130       | L   |            | non-synonymous   |
| 20 | 193748            | putative peptidyl-prolyl cis-trans isomerase               | -    | 0175          | 0161       | O   |            | non-synonymous   |
| 21 | 202251            | serine hydroxymethyltransferase                            | glyA | 0183          | 0171       | E   |            | synonymous       |
| 22 | 213107            | no annotation/ intergenic                                  |      |               |            |     |            | intergenic       |
| 23 | 231502            | putative lipopolysaccharide biosynthesis protein           | -    | 0208          | 0194       | M   |            | synonymous       |
| 24 | 237256            | succinyl-diaminopimelate desuccinylase                     | dapE | 0212          | 0198       | E   |            | synonymous       |
| 25 | 241716            | putative transporter                                       | -    | 0214          | 0200       | P   |            | synonymous       |
| 26 | 253546            | putative outer membrane protein                            | -    | 0227          | 0212       | -   | hop        | synonymous       |
| 27 | 300061            | hypothetical protein                                       | -    | 0271          | 0256       | -   |            | non-synonymous   |
| 28 | 302203            | hypothetical protein                                       | -    | 0275          | 0260       | G   |            | synonymous       |
| 29 | 348307            | hypothetical protein                                       | -    | 0311          | 0296       | -   |            | non-synonymous   |
| 30 | 358143            | flagellar basal body L-ring protein                        | flgH | 0325          | 0308       | N   | other      | synonymous       |
| 31 | 358434            | CMP-N-acetylneuraminic acid synthetase (neuA)              | -    | 0326          | 0309       | M   |            | non-synonymous   |
| 32 | 369763            | putative single-stranded-DNA-specific exonuclease RecJ     | recJ | 0348          | 0322       | L   |            | synonymous       |
| 33 | 376843            | 1-deoxy-D-xylulose-5-phosphate synthase                    | dxs  | 0354          | 0328       | HI  |            | synonymous       |
| 34 | 378456            | GTP-binding protein LepA                                   | lepA | 0355          | 0329       | M   |            | non-synonymous   |
| 35 | 384210            | septum formation protein                                   | ftsK | 1090          | 0335       | D   |            | synonymous       |
| 36 | 429464            | no annotation/ intergenic                                  |      |               |            |     |            | intergenic       |
| 37 | 447944            | hypothetical protein                                       | -    | 1023          | 0401       | -   |            | non-synonymous   |
| 38 | 456049            | phosphatidylglycerophosphate synthase                      | pgsA | -             | 0407       | I   |            | non-synonymous   |
| 38 | 456049            | hypothetical protein                                       | -    | 1015          | 0408       | -   |            | synonymous       |
| 39 | 473840            | hypothetical protein                                       | -    | 0469          | 0421       | -   |            | synonymous       |
| 40 | 499950            | putative paralog of HpaA                                   | -    | 0492          | 0444       | -   |            | synonymous       |
| 41 | 500580            | phospho-N-acetylmuramoyl-pentapeptide-transferase          | mraY | 0493          | 0445       | M   |            | non-synonymous   |
| 42 | 594636            | hypothetical protein                                       | -    | 0586          | 0534       | -   |            | non-synonymous   |
| 43 | 609188            | methyl-accepting chemotaxis protein (MCP)                  | -    | 0599          | 0546       | NT  |            | non-synonymous   |
| 44 | 611566            | flagellin A                                                | flaA | 0601          | 0548       | N   |            | non-synonymous   |
| 45 | 630827            | putative vacuolating cytotoxin (VacA) paralog              | -    | 0609/<br>0610 | 0556       | N   |            | non-synonymous   |
| 46 | 634570            | NAD-dependent DNA ligase LigA                              | ligA | 0615          | 0558       | L   |            | non-synonymous   |

| No  | Position<br>in NQ315 | Annotation <sup>a</sup>                                |        |               |                | COG | OMP<br>family | type of mutation |
|-----|----------------------|--------------------------------------------------------|--------|---------------|----------------|-----|---------------|------------------|
|     |                      | Description                                            | gene   | HP-<br>number | jhp-<br>number |     |               |                  |
| 47  | 654033               | hydrogenase, small subunit                             | hyaA   | 0631          | 0574           | C   |               | synonymous       |
| 48  | 664574               | NAD(P)H-flavin oxidoreductase                          | -      | 0642          | 0586           | C   |               | non-synonymous   |
| 49  | 676498               | no annotation/ intergenic                              |        |               |                |     |               | intergenic       |
| 50  | 678159               | protective surface antigen D15                         | -      | 0655          | 0600           | M   | other         | non-synonymous   |
| 51  | 720162               | no annotation/ intergenic                              |        |               |                |     |               | intergenic       |
| 52  | 740405               | hypothetical protein                                   | -      | 0711          | 0650           | U   |               | synonymous       |
| 53  | 745690               | hypothetical protein                                   | -      | 0718          | 0656           | R   |               | synonymous       |
| 54  | 761115               | hypothetical protein                                   | -      | 0734          | 0671           | J   |               | non-synonymous   |
| 55  | 777648               | flagellar protein FlaG                                 | -      | 0751          | 0688           | N   |               | non-synonymous   |
| 56  | 778951               | flagellar capping protein                              | fliD   | 0752          | 0689           | N   |               | synonymous       |
| 57  | 817879               | putative heavy-metal cation-transporting P-type ATPase | hmcT   | 0791          | 0727           | P   |               | synonymous       |
| 58  | 833655               | iron (III) dicitrate transport protein                 | fecA_2 | 0807          | 0743           | P   | family 4      | non-synonymous   |
| 59  | 836879               | hypothetical protein                                   | -      | 0812          | 0748           | S   |               | non-synonymous   |
| 60  | 853598               | inositol-5-monophosphate dehydrogenase                 | guaB   | 0829          | 0768           | F   |               | non-synonymous   |
| 61  | 862180               | putative outer membrane protein                        | -      | 0839          | 0777           | I   | other         | non-synonymous   |
| 62  | 869033               | type I restriction enzyme restriction subunit          | hsdR_2 | 0846          | 0784           | V   |               | non-synonymous   |
| 63  | 885894               | transcription elongation factor GreA                   | greA   | 0866          | 0800           | K   |               | non-synonymous   |
| 64  | 914113               | hypothetical protein                                   | -      | 0891          | 0824           | I   |               | non-synonymous   |
| 65  | 929855               | hypothetical protein                                   | -      | 0909          | 0845           | -   |               | synonymous       |
| 66  | 934844               | outer membrane protein/porin                           | hopC   | 0912          | 0848           | -   | hop           | non-synonymous   |
| 67  | 935824               | outer membrane protein/porin                           | hopB   | 0913          | 0849           | -   | hop           | synonymous       |
| 68  | 938193               | putative outer membrane protein                        | -      | 0914          | 0850           | -   | hof           | synonymous       |
| 69  | 938397               | putative outer membrane protein                        | -      | 0914          | 0850           | -   | hof           | synonymous       |
| 70  | 944766               | carbamoyl phosphate synthase large subunit             | carB   | 0919          | 0853           | EF  |               | synonymous       |
| 71  | 964086               | hypothetical protein                                   | -      | 0935          | 0869           | R   |               | non-synonymous   |
| 72  | 967048               | proline/betaine transporter                            | proP   | 0936          | 0871           | -   |               | non-synonymous   |
| 73  | 984288               | putative aldehyde dehydrogenase                        | -      | 0954          | 0888           | C   |               | non-synonymous   |
| 74  | 993255               | hypothetical protein                                   | -      | 0964          | 0898           | -   |               | synonymous       |
| 75  | 1034050              | methionine-tRNA synthetase                             | metG   | 0417          | 0967           | J   |               | synonymous       |
| 76  | 1035874              | cyclopropane fatty acid synthase                       | cfa    | 0416          | 0968           | M   |               | synonymous       |
| 77  | 1053154              | 30S ribosomal protein S1                               | rpsA   | 0399          | 0982           | J   |               | non-synonymous   |
| 78  | 1054048              | 30S ribosomal protein S1                               | rpsA   | 0399          | 0982           | J   |               | non-synonymous   |
| 79  | 1073021              | glutamate dehydrogenase                                | gdhA   | 0380          | 1001           | E   |               | synonymous       |
| 80  | 1083586              | biotin carboxylase                                     | accC   | 0370          | 1011           | I   |               | synonymous       |
| 81  | 1092824              | tRNA pseudouridylate synthase A                        | truA   | 0361          | 1019           | J   |               | non-synonymous   |
| 82  | 1114540              | excinuclease ABC subunit B                             | uvrB   | 1114          | 1041           | L   |               | non-synonymous   |
| 83  | 1119124              | hypothetical protein                                   | -      | 1117          | 1045           | R   |               | non-synonymous   |
| 84  | 1123858              | hypothetical protein                                   | -      | 1120          | 1048           | -   |               | synonymous       |
| 85  | 1126685              | hypothetical protein                                   | -      | 1124          | 1053           | S   |               | non-synonymous   |
| 86  | 1148572              | hypothetical protein                                   | -      | 1150          | 1077           | R   |               | non-synonymous   |
| 87  | 1156618              | putative outer membrane protein                        | -      | 1156          | 1083           | -   | hop           | non-synonymous   |
| 88  | 1157140              | putative outer membrane protein                        | -      | 1157          | 1084           | -   | hop           | synonymous       |
| 89  | 1167418              | glucose-6-phosphate isomerase                          | pgi    | 1166          | 1093           | G   |               | non-synonymous   |
| 90  | 1171386              | hypothetical protein                                   | -      | 1168          | 1095           | T   |               | synonymous       |
| 91  | 1172178              | no annotation/ intergenic                              |        |               |                |     |               | intergenic       |
| 92  | 1177102              | glucose/galactose transporter                          | gluP   | 1174          | 1101           | G   |               | synonymous       |
| 93  | 1177405              | glucose/galactose transporter                          | gluP   | 1174          | 1101           | G   |               | synonymous       |
| 94  | 1193688              | carbonic anhydrase                                     | -      | 1186          | 1112           | P   |               | non-synonymous   |
| 95  | 1205094              | DNA-directed RNA polymerase subunit beta/beta'         | rpoB   | 1198          | 1121           | K   |               | non-synonymous   |
| 96  | 1207064              | DNA-directed RNA polymerase subunit beta/beta'         | rpoB   | 1198          | 1121           | K   |               | synonymous       |
| 97  | 1209897              | DNA-directed RNA polymerase subunit beta/beta'         | rpoB   | 1198          | 1121           | K   |               | non-synonymous   |
| 98  | 1242831              | dihydropteroate synthase                               | folP   | 1232          | 1153           | H   |               | synonymous       |
| 99  | 1272916              | putative NADH oxidoreductase I                         | nuoE   | 1264          | 1185           | -   |               | synonymous       |
| 100 | 1279465              | NADH dehydrogenase subunit L                           | nuoL   | 1271          | 1192           | CP  |               | non-synonymous   |
| 101 | 1291301              | no annotation/ intergenic                              |        |               |                |     |               | intergenic       |

| No  | Position<br>in NQ315 | Annotation <sup>a</sup>                                 |         |      | HP-<br>number | jhp-<br>number | COG      | OMP<br>family  | type of mutation |
|-----|----------------------|---------------------------------------------------------|---------|------|---------------|----------------|----------|----------------|------------------|
|     |                      | Description                                             | gene    |      |               |                |          |                |                  |
| 102 | 1292464              | hypothetical protein                                    | -       | 1286 | 1206          | S              |          | synonymous     |                  |
| 103 | 1295052              | anthranilate synthase component I                       | trpE    | 1282 | 1203          | EH             |          | non-synonymous |                  |
| 104 | 1324652              | hypothetical protein                                    | -       | 1327 | 1247          | MU             | family 5 | synonymous     |                  |
| 105 | 1353392              | nicotinate-nucleotide pyrophosphorylase                 | nadC    | 1355 | 1273          | H              |          | non-synonymous |                  |
| 106 | 1355563              | phosphatidylserine decarboxylase                        | psd     | 1357 | 1275          | I              |          | synonymous     |                  |
| 107 | 1392803              | lipopolysaccharide biosynthesis protein                 | -       | 1416 | 1311          | M              |          | non-synonymous |                  |
| 108 | 1403349              | no annotation/ intergenic                               |         |      |               |                |          | intergenic     |                  |
| 109 | 1404484              | hypothetical protein                                    | -       | 1428 | 1325          | R              |          | synonymous     |                  |
| 110 | 1450075              | DNA-transfer protein                                    | virB4_2 |      | 0917          | U              |          | synonymous     |                  |
| 111 | 1458043              | chromosomal replication initiation protein              | dnaA    | 1529 | 1417          | L              |          | synonymous     |                  |
| 112 | 1466320              | type III DNA modification enzyme<br>(methyltransferase) | mod_2   | 1522 | 1411          | L              |          | synonymous     |                  |
| 113 | 1509477              | hypothetical protein                                    | -       | 1487 | 1380          | S              |          | synonymous     |                  |
| 114 | 1566549              | hypothetical protein                                    | -       | 1391 | 1436          | -              |          | synonymous     |                  |

<sup>a</sup> Annotation is based on an automatic annotation, generated with the Kodon software using the J99 annotation as a reference. The annotation of predicted ORFs with no homologue in J99 was done manually by means of BLAST searches. COG classifications are primarily based on J99 as of May 2010.

**Table S7: Clusters of nucleotide polymorphisms (CNPs)/ imports in strain pair NQ315/1712. Positions refer to the position in the virtual genome of the first isolate NQ315.**

| No | Position in NQ315 |        | Annotation <sup>a</sup><br>Description                                | gene  | HP-number     | jhp-number | COG | OMP | Import length |
|----|-------------------|--------|-----------------------------------------------------------------------|-------|---------------|------------|-----|-----|---------------|
|    | start             | end    |                                                                       |       |               |            |     |     |               |
| 1  | 1600893           | 705    | putative outer membrane protein                                       | -     | 1564          | 1472       | P   |     | 1921          |
|    |                   |        | penicillin-binding protein                                            | -     | 1565          | 1473       | M   |     |               |
| 2  | 1879              | 2173   | hypothetical protein                                                  | -     | 1566          | 1474       | -   |     | 295           |
|    |                   |        | ribosome biogenesis GTP-binding protein                               | engB  | 1567          | 1475       | R   |     |               |
| 3  | 8988              | 9949   | ABC transporter ATP-binding protein                                   | metN  | 1576          | 1484       | P   |     | 962           |
|    |                   |        | ABC transporter, permease                                             | -     | 1577          | 1485       | P   |     |               |
| 4  | 10787             | 12260  | hypothetical protein                                                  | -     | 1580          | 1487       | I   |     | 1474          |
|    |                   |        | putative undecaprenyl-phosphate-alpha-N-acetylglucosaminyltransferase | wecA  | 1581          | 1488       | M   |     |               |
| 5  | 12493             | 12519  | pyridoxine 5'-phosphate synthase                                      | pdxJ  | 1582          | 1489       | H   |     | 27            |
| 6  | 12928             | 12955  | pyridoxine 5'-phosphate synthase                                      | pdxJ  | 1582          | 1489       | H   |     | 28            |
| 7  | 13169             | 13234  | 4-hydroxythreonine-4-phosphate                                        | pdxA  | 1583          | 1490       | H   |     | 66            |
| 8  | 13760             | 13958  | 4-hydroxythreonine-4-phosphate                                        | pdxA  | 1583          | 1490       | H   |     | 199           |
| 9  | 14240             | 14480  | putative DNA-binding/iron metalloprotein/AP endonuclease              | ydiE  | 1584          | 1491       | O   |     | 241           |
| 10 | 16796             | 16824  | no annotation/ intergenic                                             |       |               |            |     |     | 29            |
| 11 | 18228             | 18244  | no annotation/ intergenic                                             |       |               |            |     |     | 17            |
| 12 | 20255             | 20835  | transcription antitermination protein NusB                            | nusB  | 0001          | 0001       | K   |     | 581           |
|    |                   |        | 6,7-dimethyl-8-ribityllumazine synthase                               | ribH  | 0002          | 0002       | H   |     |               |
| 13 | 21101             | 22767  | 2-dehydro-3-deoxyphosphooctonate aldolase                             | kdsA  | 0003          | 0003       | M   |     | 1667          |
|    |                   |        | carbonic anhydrase                                                    | icfA  | 0004          | 0004       | P   |     |               |
|    |                   |        | orotidine 5'-phosphate decarboxylase                                  | pyrF  | 0005          | 0005       | F   |     |               |
| 14 | 23053             | 24311  | orotidine 5'-phosphate decarboxylase                                  | pyrF  | 0005          | 0005       | F   |     | 1259          |
|    |                   |        | pantoate-beta-alanine ligase                                          | panC  | 0006          | 0006       | H   |     |               |
| 15 | 24734             | 25432  | putative outer membrane protein                                       | -     | 0009          | 0007       | -   | hop | 699           |
| 16 | 25867             | 26008  | putative outer membrane protein                                       | -     | 0009          | 0007       | -   | hop | 142           |
| 17 | 26218             | 27078  | putative outer membrane protein                                       | -     | 0009          | 0007       | -   | hop | 861           |
| 18 | 28112             | 28217  | chaperonin GroEL                                                      | groEL | 0010          | 0008       | O   |     | 106           |
| 19 | 28598             | 29039  | chaperonin GroEL                                                      | groEL | 0010          | 0008       | O   |     | 442           |
| 20 | 44640             | 46222  | putative outer membrane protein                                       | -     | 0025          | 0021       | -   | hop | 1583          |
|    |                   |        | type II citrate synthase                                              | gltA  | 0026          | 0022       | C   |     |               |
| 21 | 89824             | 90250  | urea transporter                                                      | ureI  | 0071          | 0066       | -   |     | 427           |
| 22 | 117199            | 117316 | hypothetical protein                                                  | -     | 0097          | 0089       | -   |     | 118           |
| 23 | 119120            | 119315 | methyl-accepting chemotaxis protein (MCP)                             | -     | 0099          | 0091       | NT  |     | 196           |
| 24 | 119598            | 119733 | methyl-accepting chemotaxis protein (MCP)                             | -     | 0099          | 0091       | NT  |     | 136           |
| 25 | 130290            | 132087 | cysteine synthase                                                     | cysK  | 0107          | 0099       | E   |     | 1798          |
|    |                   |        | hypothetical protein                                                  | -     | 0108          | 0100       | -   |     |               |
|    |                   |        | molecular chaperone DnaK                                              | dnaK  | 0109          | 0101       | O   |     |               |
| 26 | 132333            | 133272 | molecular chaperone DnaK                                              | dnaK  | 0109          | 0101       | O   |     | 940           |
|    |                   |        | 24kDa chaperone                                                       | grpE  | 0110          | 0102       | O   |     |               |
| 27 | 175649            | 178228 | phosphopyruvate hydratase                                             | eno   | 0154          | 0142       | G   |     | 2580          |
|    |                   |        | hypothetical protein                                                  | -     | 0155          | 0143       | -   |     |               |
|    |                   |        | hypothetical protein                                                  | -     | 0156          | 0144       | -   |     |               |
|    |                   |        | shikimate kinase                                                      | aroK  | 0157          | 0145       | E   |     |               |
|    |                   |        | hypothetical protein                                                  | -     | 0158          | 0146       | -   |     |               |
| 28 | 178469            | 178707 | hypothetical protein                                                  | -     | 0158          | 0146       | -   |     | 239           |
| 29 | 180852            | 180917 | hypothetical protein                                                  | -     | 0160          | 0148       | R   |     | 66            |
| 30 | 183756            | 185494 | putative histidine kinase sensor protein                              | -     | 0164/<br>0165 | 0151       | T   |     | 1739          |
|    |                   |        | putative transkriptional regulator                                    | -     | 0166          | 0152       | TK  |     |               |
| 31 | 205109            | 205735 | putative cardiolipin synthase                                         | -     | 0190          | 0176       | I   |     | 627           |
| 32 | 206291            | 206456 | putative cardiolipin synthase                                         | -     | 0190          | 0176       | I   |     | 166           |
| 33 | 249233            | 249240 | DNA repair protein RadA                                               | radA  | 0223          | 0209       | O   |     | 8             |
| 34 | 252094            | 252334 | hypothetical protein                                                  | -     | 0226          | 0211       | R   |     | 241           |
| 35 | 252758            | 252970 | hypothetical protein                                                  | -     | 0226          | 0211       | R   |     | 213           |

| No | Position in NQ315 |         | Annotation <sup>a</sup><br>Description         | gene       | HP-number     | jhp-number | COG | OMP      | Import length |
|----|-------------------|---------|------------------------------------------------|------------|---------------|------------|-----|----------|---------------|
|    | start             | end     |                                                |            |               |            |     |          |               |
| 36 | 255055            | 255057  | putative outer membrane protein                | -          | 0227          | 0212       | -   | hop      | 3             |
| 37 | 258701            | 259103  | 3-deoxy-manno-octulosonate                     | kdsB       | 0230          | 0215       | M   |          | 403           |
| 38 | 274829            | 275197  | ATP-dependent RNA helicase DeaD                | deaD       | 0247          | 0232       | LKJ |          | 369           |
|    |                   |         | hypothetical protein                           | -          | 0248          | 0233       | O   |          |               |
| 39 | 278622            | 278838  | ABC transporter, permease                      | -          | 0251          | 0236       | R   |          | 217           |
| 40 | 279869            | 280244  | putative outer membrane protein                | -          | 0252          | 0237       | -   | hop      | 376           |
| 41 | 301155            | 301170  | hypothetical protein                           | -          | 0274          | 0259       | R   |          | 16            |
| 42 | 318949            | 319225  | putative vacuolating cytotoxin (VacA) paralog  | -          | 0289          | 0274       | N   |          | 277           |
| 43 | 338860            | 338926  | peptide ABC transporter ATP-binding protein    | dppF       | 0302          | 0287       | R   |          | 67            |
| 44 | 352433            | 352616  | arginyl-tRNA synthetase                        | argS       | 0319          | 0302       | J   |          | 184           |
| 45 | 359646            | 359647  | CMP-N-acetylneuraminic acid synthetase         | -          | 0326          | 0309       | M   |          | 2             |
| 46 | 362522            | 362527  | ketol-acid reductoisomerase                    | ilvC       | 0330          | 0313       | EH  |          | 6             |
| 47 | 367780            | 368160  | hypothetical protein                           | -          | 0347          | 0321       | J   |          | 381           |
| 48 | 489698            | 489788  | hypothetical protein                           | -          | 0485          | 0437       | P   |          | 91            |
| 49 | 489993            | 492290  | outer membrane protein                         | -          | 0486          | 0438       | -   | hof      | 2298          |
|    |                   |         | putative outer membrane protein                | -          | 0487          | 0439       | -   | hof      |               |
| 50 | 505715            | 507040  | putative transporter                           | -          | 0498          | 0450       | R   |          | 1326          |
|    |                   |         | putative phospholipase A1                      | pldA       | 0499          | 0451       | M   |          |               |
| 51 | 595819            | 595825  | hypothetical protein                           | -          | 0586          | 0534       | -   |          | 7             |
| 52 | 612953            | 613565  | flagellin A                                    | flaA       | 0601          | 0548       | N   |          | 613           |
|    |                   |         | 3-methyladenine DNA glycosylase                | -          | 0602          | 0549       | L   |          |               |
| 53 | 614341            | 618088  | hypothetical protein                           | -          | 0603          | 0550       | -   |          | 3748          |
|    |                   |         | uroporphyrinogen decarboxylase                 | hemE       | 0604          | 0551       | H   |          |               |
|    |                   |         | hypothetical protein                           | -          | 0605          | 0552       | MU  | family 5 |               |
|    |                   |         | putative efflux transporter                    | -          | 0606          | 0553       | M   |          |               |
|    |                   |         | putative efflux transporter                    | -          | 0607          | 0554       | V   |          |               |
| 54 | 719252            | 719624  | putative outer membrane protein                | -          | 0694          | 0634       | S   | other    | 373           |
| 55 | 737795            | 738322  | hypothetical protein                           | -          | 0708          | 0647       | -   |          | 528           |
|    |                   |         | hypothetical protein                           | -          | 0709          | 0648       | S   |          |               |
| 56 | 738675            | 738980  | hypothetical protein                           | -          | 0709          | 0648       | S   |          | 306           |
| 57 | 739784            | 740022  | hypothetical protein                           | -          | 0711          | 0650       | U   |          | 239           |
| 58 | 742057            | 742061  | RNA polymerase factor sigma-54                 | rpoN       | 0714          | 0652       | K   |          | 5             |
| 59 | 750402            | 750408  | putative outer membrane protein                | -          | 0725          | 0662       | -   | hop      | 7             |
| 60 | 751250            | 751764  | putative outer membrane protein                | -          | 0725          | 0662       | -   | hop      | 515           |
| 61 | 752744            | 753336  | putative outer membrane protein                | -          | 0726          | 0663       | -   | other    | 593           |
|    |                   |         | putative transcriptional regulator             | -          | 0727          | 0664       | J   |          |               |
| 62 | 753943            | 753949  | putative transcriptional regulator             | -          | 0727          | 0664       | J   |          | 7             |
| 63 | 776178            | 776179  | hypothetical protein                           | -          | 0749          | 0686       | D   |          | 2             |
| 64 | 846122            | 846124  | exinuclease ABC subunit C                      | urvC       | 0821          | 0760       | L   |          | 3             |
| 65 | 894682            | 895098  | catalase                                       | katA       | 0875          | 0809       | P   |          | 417           |
| 66 | 896275            | 896520  | putative iron-regulated outer membrane         | frpB_1     | 0876          | 0810       | P   | family 4 | 246           |
| 67 | 916524            | 916528  | no annotation/ intergenic                      |            |               |            |     |          | 5             |
| 68 | 936226            | 936769  | outer membrane protein/porin                   | hopB       | 0913          | 0849       | -   | hop      | 544           |
| 69 | 937217            | 937787  | no annotation/ intergenic                      |            |               |            |     |          | 571           |
| 70 | 938613            | 939993  | putative outer membrane protein                | -          | 0914          | 0850       | -   | hof      | 1381          |
|    |                   |         | putative iron-regulated outer membrane protein | frpB_2     | 0915/<br>0916 | 0851       | P   | family 4 |               |
| 71 | 957000            | 957456  | recombination protein RecR                     | recR       | 0925          | 0859       | L   |          | 457           |
|    |                   |         | tRNA pseudouridine synthase D                  | truD       | 0926          | 0860       | S   |          |               |
| 72 | 958172            | 958781  | tRNA pseudouridine synthase D                  | truD       | 0926          | 0860       | S   |          | 610           |
|    |                   |         | heat shock protein HtpX                        | htpX       | 0927          | 0861       | O   |          |               |
| 73 | 959808            | 960980  | geranyltranstransferase                        | ispA       | 0929          | 0864       | H   |          | 1173          |
|    |                   |         | stationary phase survival protein SurE         | surE       | 0930          | 0865       | R   |          |               |
| 74 | 962939            | 963021  | hypothetical protein                           | -          | 0934          | 0868       | O   |          | 83            |
| 75 | 975992            | 976104  | hypothetical protein                           | HPAG1_0928 |               |            | -   |          | 113           |
| 76 | 976792            | 976867  | hypothetical protein                           | -          | 0946          | 0880       | C   |          | 76            |
| 77 | 977176            | 977179  | hypothetical protein                           | -          | 0946          | 0880       | C   |          | 4             |
| 78 | 1029285           | 1029325 | putative polysaccharide biosynthesis protein   | -          | 0421          | 0963       | M   |          | 41            |
| 79 | 1030691           | 1030756 | hypothetical protein                           | -          | 0420          | 0964       | Q   |          | 66            |

| No  | Position in NQ315 |         | Annotation <sup>a</sup>                                                                                          | gene                         | HP-number                    | jhp-number                   | COG               | OMP | Import length |
|-----|-------------------|---------|------------------------------------------------------------------------------------------------------------------|------------------------------|------------------------------|------------------------------|-------------------|-----|---------------|
|     | start             | end     | Description                                                                                                      |                              |                              |                              |                   |     |               |
| 80  | 1031851           | 1032323 | hypothetical protein                                                                                             | -                            | 0418                         | 0966                         | -                 |     | 473           |
| 81  | 1032537           | 1033281 | hypothetical protein<br>methionyl-tRNA synthetase                                                                | metG                         | 0418<br>0417                 | 0966<br>0967                 | -<br>J            |     | 745           |
| 82  | 1034403           | 1034881 | methionyl-tRNA synthetase<br>cyclopocyclopropane fatty acid synthase                                             | metG<br>cfa                  | 0417<br>0416                 | 0967<br>0968                 | J<br>M            |     | 479           |
| 83  | 1035088           | 1035586 | cyclopocyclopropane fatty acid synthase                                                                          | cfa                          | 0416                         | 0968                         | M                 |     | 499           |
| 84  | 1038139           | 1039976 | hypothetical protein<br>hypothetical protein<br>hypothetical protein<br>putative paralog of HpaA<br>GMP synthase | -<br>HPAG1_0981<br>-<br>guaA | 0412<br>0411<br>0410<br>0409 | 0970<br>-<br>0971<br>0972    | -<br>-<br>-<br>F  |     | 1838          |
| 85  | 1040797           | 1041245 | GMP synthase                                                                                                     | guaA                         | 0409                         | 0972                         | F                 |     | 449           |
| 86  | 1090623           | 1090934 | protein-L-isoaspartate O-methyltransferase                                                                       | pcm                          | 0363                         | 1017                         | O                 |     | 312           |
| 87  | 1092005           | 1092498 | hypothetical protein<br>tRNA pseudouridine synthase A                                                            | -<br>truA                    | 0362<br>0361                 | 1018<br>1019                 | R<br>J            |     | 494           |
| 88  | 1143006           | 1144837 | hypothetical protein<br>hypothetical protein                                                                     | -<br>-                       | 1143<br>1144                 | 1071<br>1072                 | S<br>-            |     | 1832          |
| 89  | 1153853           | 1154396 | undecaprenyldiphospho-<br>muramoylpentapeptide beta-N-                                                           | murG                         | 1155                         | 1082                         | M                 |     | 544           |
| 90  | 1157630           | 1158191 | putative outer membrane protein                                                                                  | -                            | 1157                         | 1084                         | -                 | hop | 562           |
| 91  | 1159817           | 1159819 | putative outer membrane protein                                                                                  | -                            | 1157                         | 1084                         | -                 | hop | 3             |
| 92  | 1160618           | 1160822 | pyrroline-5-carboxylate reductase                                                                                | proC                         | 1158                         | 1085                         | E                 |     | 205           |
| 93  | 1161504           | 1161505 | putative cAMP-induced cell filamentation                                                                         | fic                          | 1159                         | 1086                         | D                 |     | 2             |
| 94  | 1165996           | 1166002 | hypothetical protein                                                                                             | -                            | 1165                         | 1092                         | -                 |     | 7             |
| 95  | 1167678           | 1168178 | glucose-6-phosphate isomerase                                                                                    | pgi                          | 1166                         | 1093                         | G                 |     | 501           |
| 96  | 1168438           | 1169432 | putative outer membrane protein                                                                                  | -                            | 1167                         | 1094                         | -                 | hof | 995           |
| 97  | 1179507           | 1179751 | putative outer membrane function                                                                                 | -                            | 1177                         | 1103                         | -                 | hop | 245           |
| 98  | 1180115           | 1180568 | putative outer membrane function                                                                                 | -                            | 1177                         | 1103                         | -                 | hop | 454           |
| 99  | 1187521           | 1188485 | multidrug ABC transprotor<br>hypothetical protein                                                                | -<br>-                       | 1181<br>1182                 | 1107<br>1108                 | G<br>D            |     | 965           |
| 100 | 1190201           | 1190315 | putative NA <sup>+</sup> /H <sup>+</sup> antiporter                                                              | -                            | 1183                         | 1109                         | P                 |     | 115           |
| 101 | 1191019           | 1192351 | hypothetical protein<br>sugar efflux transporter                                                                 | -<br>-                       | 1184<br>1185                 | 1110<br>1111                 | V<br>G            |     | 1333          |
| 102 | 1193039           | 1193296 | sugar efflux transporter                                                                                         | -                            | 1185                         | 1111                         | G                 |     | 258           |
| 103 | 1194707           | 1195277 | aspartate-semialdehyde dehydrogenase                                                                             | asd                          | 1189                         | 1114                         | E                 |     | 571           |
| 104 | 1253758           | 1254537 | outer membrane protein - adhesin                                                                                 | babB                         | 0896                         | 1164                         | -                 | hop | 780           |
| 105 | 1254749           | 1254913 | outer membrane protein - adhesin                                                                                 | babB                         | 0896                         | 1164                         | -                 | hop | 165           |
| 106 | 1255636           | 1255765 | outer membrane protein -fragment                                                                                 | -                            | -                            | -                            | -                 |     | 130           |
| 107 | 1338669           | 1338735 | outer membrane protein                                                                                           | -                            | 1342                         | 1261                         | -                 | hop | 67            |
| 108 | 1345403           | 1345492 | hypothetical protein                                                                                             | -                            | 1349                         | 1268                         | -                 |     | 90            |
| 109 | 1345742           | 1346600 | hypothetical protein<br>carboxyl-terminal protease                                                               | -<br>prc                     | 1349<br>1350                 | 1268<br>1269                 | -<br>M            |     | 859           |
| 110 | 1346846           | 1347248 | carboxyl-terminal protease                                                                                       | prc                          | 1350                         | 1269                         | M                 |     | 403           |
| 111 | 1366508           | 1366614 | type III restriction enzyme R protein                                                                            | -                            | 1371                         | 1285                         | -                 |     | 107           |
| 112 | 1366983           | 1366984 | type III restriction enzyme R protein                                                                            | -                            | 1371                         | 1285                         | -                 |     | 2             |
| 113 | 1368025           | 1368037 | type III restriction enzyme R protein                                                                            | -                            | 1371                         | 1285                         | -                 |     | 13            |
| 114 | 1474062           | 1474256 | putative type II DNA modification enzyme<br>(methyltransferase)                                                  | -                            |                              | 1409                         | V                 |     | 195           |
| 115 | 1509998           | 1510114 | hypothetical protein                                                                                             | -                            | 1487                         | 1380                         | S                 |     | 117           |
| 116 | 1562153           | 1565089 | hypothetical protein<br>hypothetical protein<br>DNA repair protein (recombination protein N)                     | -<br>-<br>recN               | 1395<br>1394<br>1393         | 1432<br>1433<br>1434         | -<br>G<br>L       | hor | 2937          |
| 117 | 1574475           | 1575202 | transcription-repair coupling factor                                                                             | mfd                          | 1541                         | 1458                         | LK                |     | 728           |
| 118 | 1575490           | 1579017 | transcription-repair coupling factor<br>hypothetical protein<br>hypothetical protein<br>hypothetical protein     | mfd<br>-<br>-<br>-           | 1541<br>1542<br>1543<br>1544 | 1458<br>1457<br>1456<br>1455 | LK<br>M<br>M<br>M |     | 3528          |
| 119 | 1579404           | 1579413 | hypothetical protein                                                                                             | -                            | 1544                         | 1455                         | M                 |     | 10            |
| 120 | 1599197           | 1599672 | hypothetical protein                                                                                             | -                            | 1561                         | 1469                         | P                 |     | 476           |



| No  | Position in NQ315 |         | Annotation <sup>a</sup> |      |           |            |     | Import length |     |
|-----|-------------------|---------|-------------------------|------|-----------|------------|-----|---------------|-----|
|     | start             | end     | Description             | gene | HP-number | jhp-number | COG |               | OMP |
| 121 | 1599883           | 1599972 | putative peroxidase     | tsaA | 1563      | 1471       | O   |               | 90  |

<sup>a</sup> Annotation is based on an automatic annotation, generated with the Kodon software using the J99 annotation as a reference. The annotation of predicted ORFs with no homologue in J99 was done manually by means of BLAST searches. COG classifications are primarily based on J99 as of May 2010.

**Table S8: Isolated (non-clustered) single nucleotide polymorphisms (SNPs) in strain pair NQ352/1701. Positions refer to the position in the virtual genome of the first isolate NQ352.**

| No | Position in NQ352 | Annotation <sup>a</sup>                       |        |           |            | COG | OMP family | type of mutation |
|----|-------------------|-----------------------------------------------|--------|-----------|------------|-----|------------|------------------|
|    |                   | Description                                   | gene   | HP-number | jhp-number |     |            |                  |
| 1  | 5016              | putative recombination protein RecB           | pcrA   | 1553      | 1446       | L   |            | non-synonymous   |
| 2  | 5352              | putative recombination protein RecB           | pcrA   | 1553      | 1446       | L   |            | non-synonymous   |
| 3  | 7065              | Na <sup>+</sup> /H <sup>+</sup> antiporter 1  | nhaA   | 1552      | 1447       | P   |            | synonymous       |
| 4  | 9049              | preprotein translocase subunit SecD           | secD   | 1550      | 1449       | U   |            | non-synonymous   |
| 5  | 20696             | ubiquinol cytochrome c oxidoreductase,        | petB   | 1539      | 1460       | C   |            | non-synonymous   |
| 6  | 21909             | ubiquinol cytochrome c oxidoreductase,        | petC   | 1538      | 1461       | C   |            | non-synonymous   |
| 7  | 32469             | putative outer membrane protein               | -      | 1564      | 1472       | P   |            | non-synonymous   |
| 8  | 44465             | hypothetical protein                          | -      | 1580      | 1487       | I   |            | non-synonymous   |
| 9  | 60836             | putative outer membrane protein               | -      | 0009      | 0007       | -   | hop        | non-synonymous   |
| 10 | 65401             | hypothetical protein                          | -      | 0013      | 0011       | J   |            | synonymous       |
| 11 | 72058             | putative chemotaxis protein                   | cheV_1 | 0019      | 0017       | NT  |            | synonymous       |
| 12 | 80908             | isocitrate dehydrogenase                      | icd    | 0027      | 0023       | C   |            | synonymous       |
| 13 | 89812             | hypothetical protein                          | -      | 0037      | 0033       | U   |            | non-synonymous   |
| 14 | 121607            | hypothetical protein                          | -      | 0063      | 0058       | -   |            | non-synonymous   |
| 15 | 135868            | hypothetical protein                          | -      | 0080      | 0074       | -   |            | synonymous       |
| 16 | 173819            | hypothetical protein                          | -      | 0114      | 0106       | S   |            | synonymous       |
| 17 | 178523            | hypothetical protein                          | -      | 0117      | 0109       | C   |            | non-synonymous   |
| 18 | 204376            | hypothetical protein                          | -      | 0143      | 0131       | P   |            | non-synonymous   |
| 19 | 216372            | hypothetical protein                          | -      | 0158      | 0146       | -   |            | synonymous       |
| 20 | 218120            | hypothetical protein                          | -      | 0160      | 0148       | R   |            | synonymous       |
| 21 | 218634            | no annotation/ intergenic                     |        |           |            |     |            | intergenic       |
| 22 | 227062            | peptide chain release factor 2                | prfB   | 0171      | 0157       | J   |            | non-synonymous   |
| 23 | 230334            | no annotation/ intergenic                     |        |           |            |     |            | intergenic       |
| 24 | 231356            | putative peptidyl-prolyl cis-trans isomerase  | -      | 0175      | 0161       | O   |            | synonymous       |
| 25 | 245164            | fumarate reductase iron-sulfur subunit        | sdhB   | 0191      | 0177       | C   |            | synonymous       |
| 26 | 249679            | enoyl-(acyl carrier protein) reductase        | fabI   | 0195      | 0181       | I   |            | synonymous       |
| 27 | 252179            | S-adenosylmethionine synthetase               | metK   | 0197      | 0183       | H   |            | non-synonymous   |
| 28 | 253168            | 50S ribosomal protein L32                     | rpmF   | 0200      | 0186       | J   |            | non-synonymous   |
| 29 | 255495            | hypothetical protein                          | -      | 0203      | 0189       | -   |            | synonymous       |
| 30 | 262798            | putative outer membrane protein               | -      | 0209      | 0195       | -   | hof        | non-synonymous   |
| 31 | 276412            | cysteine desulfurase                          | -      | 0220      | 0206       | E   |            | synonymous       |
| 32 | 277860            | hypothetical protein                          | -      | 0222      | 0208       | -   |            | non-synonymous   |
| 33 | 283578            | putative outer membrane protein               | -      | 0227      | 0212       | -   | hop        | non-synonymous   |
| 34 | 286928            | outer membrane protein/porin                  | hopA   | 0229      | 0214       | -   | hop        | synonymous       |
| 35 | 288235            | hypothetical protein                          | -      | 0231      | 0216       | O   |            | synonymous       |
| 36 | 288898            | hypothetical protein                          | -      | 0231      | 0216       | O   |            | synonymous       |
| 37 | 292350            | hypothetical protein                          | -      | 0235      | 0220       | R   |            | non-synonymous   |
| 38 | 292611            | hypothetical protein                          | -      | 0235      | 0220       | R   |            | non-synonymous   |
| 39 | 297097            | glutamyl-tRNA reductase                       | hemA   | 0239      | 0224       | H   |            | non-synonymous   |
| 40 | 297414            | glutamyl-tRNA reductase                       | hemA   | 0239      | 0224       | H   |            | synonymous       |
| 41 | 298584            | hypothetical protein                          | -      | 0241      | 0226       | -   |            | synonymous       |
| 42 | 309956            | putative outer membrane protein               | -      | 0252      | 0237       | -   | hop        | synonymous       |
| 43 | 312639            | adenylosuccinate synthetase                   | purA   | 0255      | 0239       | F   |            | synonymous       |
| 44 | 327806            | hypothetical protein                          | -      | 0270      | 0255       | S   |            | non-synonymous   |
| 45 | 331622            | hypothetical protein                          | -      | 0275      | 0260       | G   |            | synonymous       |
| 46 | 337445            | queuine tRNA-ribosyltransferase               | tgt    | 0281      | 0266       | J   |            | synonymous       |
| 47 | 337668            | hypothetical protein                          | -      | 0282      | 0267       | S   |            | synonymous       |
| 48 | 340878            | hypothetical protein                          | -      | 0284      | 0269       | M   |            | synonymous       |
| 49 | 345957            | putative vacuolating cytotoxin (VacA) paralog | -      | 0289      | 0274       | N   |            | non-synonymous   |
| 50 | 346475            | putative vacuolating cytotoxin (VacA) paralog | -      | 0289      | 0274       | N   |            | synonymous       |
| 51 | 356189            | hypothetical protein                          | -      | 0292      | 0277       | S   |            | synonymous       |
| 52 | 364973            | peptide ABC transporter permease              | dppB   | 0299      | 0284       | EP  |            | non-synonymous   |
| 53 | 367619            | peptide ABC transporter ATP-binding protein   | dppF   | 0302      | 0287       | R   |            | synonymous       |
| 54 | 373079            | hypothetical protein                          | -      | 0308      | 0293       | -   |            | synonymous       |
| 55 | 379229            | no annotation/ intergenic                     |        |           |            |     |            | intergenic       |

| No  | Position in NQ352 | Annotation <sup>a</sup>                                            |          |               |            | COG | OMP family | type of mutation |
|-----|-------------------|--------------------------------------------------------------------|----------|---------------|------------|-----|------------|------------------|
|     |                   | Description                                                        | gene     | HP-number     | jhp-number |     |            |                  |
| 56  | 383779            | poly E-rich protein                                                | -        | 0322          | 0305       | -   |            | synonymous       |
| 57  | 394021            | holliday junction resolvase-like protein                           | -        | 0334          | 0317       | L   |            | non-synonymous   |
| 58  | 399232            | CTP synthase                                                       | pyrG     | 0349          | 0323       | F   |            | synonymous       |
| 59  | 405518            | 1-deoxy-D-xylulose-5-phosphate synthase                            | dxs      | 0354          | 0328       | HI  |            | synonymous       |
| 60  | 420747            | hypothetical protein                                               | -        | 1085          | 0340       | -   |            | synonymous       |
| 61  | 436547            | ATP-dependent zinc metallopeptidase                                | ftsH_2   | 1069          | 0356       | O   |            | synonymous       |
| 62  | 447694            | hypothetical protein                                               | -        | 1055          | 0370       | -   |            | non-synonymous   |
| 63  | 456536            | hypothetical protein                                               | -        | 1046          | 0379       | S   |            | non-synonymous   |
| 64  | 459585            | hypothetical protein                                               | -        | 1044          | 0380       | R   |            | non-synonymous   |
| 65  | 481279            | response regulator                                                 | -        | 1021          | 0403       | TK  |            | non-synonymous   |
| 66  | 486886            | phosphatidylglycerophosphate synthase                              | pgsA     | 1016          | 0407       | I   |            | synonymous       |
| 67  | 492261            | polyphosphate kinase                                               | ppk      | 1010          | 0413       | P   |            | synonymous       |
| 68  | 502244            | hypothetical protein                                               | -        | 0466          | 0418       | -   |            | synonymous       |
| 69  | 506783            | no annotation/ intergenic                                          |          |               |            |     |            | intergenic       |
| 70  | 515990            | hypothetical protein                                               | -        | 0480          | 0432       | T   |            | non-synonymous   |
| 71  | 523448            | outer membrane protein                                             | -        | 0486          | 0438       | -   | hof        | synonymous       |
| 72  | 527295            | hypothetical protein                                               | -        | 0488          | 0440       | -   |            | non-synonymous   |
| 73  | 527714            | hypothetical protein                                               | -        | 0488          | 0440       | -   |            | synonymous       |
| 74  | 534579            | UDP-N-acetylmuramoyl-L-alanyl-D-glutamate synthetase               | murD     | 0494          | 0446       | M   |            | synonymous       |
| 75  | 536249            | putative transporter                                               | -        | 0497          | 0449       | R   |            | non-synonymous   |
| 76  | 545893            | putative outer membrane protein                                    | -        | 0506          | 0456       | M   | other      | synonymous       |
| 77  | 551069            | no annotation/ intergenic                                          |          |               |            |     |            | intergenic       |
| 78  | 559384            | hypothetical protein                                               | -        | 0518          | 0467       | S   |            | non-synonymous   |
| 79  | 559784            | hypothetical protein                                               | -        | 0519          | 0468       | R   |            | synonymous       |
| 80  | 560022            | hypothetical protein                                               | -        | 0519          | 0468       | R   |            | non-synonymous   |
| 81  | 560304            | hypothetical protein                                               | -        | 0519          | 0468       | R   |            | non-synonymous   |
| 82  | 570696            | cag island protein                                                 | orf13/14 | 0527          | 0476       | U   |            | synonymous       |
| 83  | 581265            | cag island protein                                                 | cagP     | 0536          | 0484       | -   |            | non-synonymous   |
| 84  | 596066            | cag island protein, cytotoxicity associated immunodominant antigen | cagA     | 0547          | 0495       | -   |            | non-synonymous   |
| 85  | 596285            | cag island protein, cytotoxicity associated immunodominant antigen | cagA     | 0547          | 0495       | -   |            | non-synonymous   |
| 86  | 606389            | 3-oxoacyl-(acyl carrier protein) synthase II                       | fabB     | 0558          | 0505       | IQ  |            | synonymous       |
| 87  | 615170            | GTP-dependent nucleic acid-binding protein EngD                    | -        | 0569          | 0516       | J   |            | non-synonymous   |
| 88  | 620073            | signal peptidase I                                                 | lepB     | 0576          | 0523       | U   |            | non-synonymous   |
| 89  | 625859            | dihydroorotase                                                     | pyrC_2   | 0581          | 0528       | F   |            | synonymous       |
| 90  | 629084            | hypothetical protein                                               | -        | 0585          | 0533       | P   |            | non-synonymous   |
| 91  | 632439            | hypothetical protein                                               | -        | 0587          | 0535       | R   |            | synonymous       |
| 92  | 634472            | 2-oxoglutarate acceptor oxidoreductase subunit OorA                | oorA     | 0589          | 0537       | C   |            | synonymous       |
| 93  | 637862            | hypothetical protein                                               | -        |               | 0540       | R   |            | synonymous       |
| 94  | 651717            | hypothetical protein                                               | -        | 0605          | 0552       | MU  | family 5   | non-synonymous   |
| 95  | 664920            | putative vacuolating cytotoxin (VacA) paralog                      | -        | 0609/<br>0610 | 0556       | N   |            | non-synonymous   |
| 96  | 672162            | aspartyl-tRNA synthetase                                           | aspS     | 0617          | 0560       | J   |            | synonymous       |
| 97  | 680162            | UDP-N-acetylmuramate-L-alanine ligase                              | murC     | 0623          | 0567       | M   |            | synonymous       |
| 98  | 704330            | hypothetical protein                                               | -        | 0647          | 0592       | -   |            | synonymous       |
| 99  | 708192            | alpha(1,3)-fucosyltransferase                                      | fucT     | 0651          | 0596       | -   |            | non-synonymous   |
| 100 | 711383            | protective surface antigen D15                                     | -        | 0655          | 0600       | M   | other      | non-synonymous   |
| 101 | 712668            | protective surface antigen D15                                     | -        | 0655          | 0600       | M   | other      | synonymous       |
| 102 | 715331            | putative processing protease                                       | -        | 0657          | 0602       | R   |            | non-synonymous   |
| 103 | 717953            | hypothetical protein                                               | -        | 0659          | 0604       | -   |            | synonymous       |
| 104 | 722529            | hypothetical protein                                               | -        | 0664          | 0609       | -   |            | synonymous       |
| 105 | 743850            | iron (III) dicitrate transport protein                             | fecA_1   | 0686          | 0626       | P   | family 4   | synonymous       |
| 106 | 747924            | no annotation/ intergenic                                          |          |               |            |     |            | intergenic       |

| No  | Position in NQ352 | Annotation <sup>a</sup>                                                          |            | HP-number     | jhp-number | COG | OMP family | type of mutation |
|-----|-------------------|----------------------------------------------------------------------------------|------------|---------------|------------|-----|------------|------------------|
|     |                   | Description                                                                      | gene       |               |            |     |            |                  |
| 107 | 748429            | hypothetical protein                                                             | -          | 0688/<br>0689 | 0628       | L   |            | non-synonymous   |
| 108 | 749207            | acetyl-coA acetyltransferase                                                     | thl        | 0690          | 0638       | I   |            | synonymous       |
| 109 | 754350            | putative hydrantoin utilization                                                  | -          | 0695          | 0633       | EQ  |            | non-synonymous   |
| 110 | 766304            | excinuclease ABC subunit A                                                       | uvrA       | 0705          | 0644       | L   |            | synonymous       |
| 111 | 766599            | excinuclease ABC subunit A                                                       | uvrA       | 0705          | 0644       | L   |            | synonymous       |
| 112 | 775987            | RNA polymerase factor sigma-54                                                   | rpoN       | 0714          | 0652       | K   |            | synonymous       |
| 113 | 794425            | hypothetical protein                                                             | -          | 0733          | 0670       | R   |            | non-synonymous   |
| 114 | 804387            | hypothetical protein                                                             | -          | 0744          | 0681       | R   |            | non-synonymous   |
| 115 | 806140            | hypothetical protein                                                             | -          | 0745          | 0682       | J   |            | non-synonymous   |
| 116 | 807444            | hypothetical protein                                                             | -          | 0746          | 0683       | R   |            | synonymous       |
| 117 | 818871            | hypothetical protein                                                             | -          | 0759          | 0696       | V   |            | non-synonymous   |
| 118 | 825968            | molybdenum cofactor biosynthesis protein A                                       | moaA       | 0768          | 0705       | H   |            | non-synonymous   |
| 119 | 826836            | molybdenum cofactor biosynthesis protein A                                       | moaA       | 0768          | 0705       | H   |            | non-synonymous   |
| 120 | 831271            | hypothetical protein                                                             | -          | 0773          | 0710       | R   |            | synonymous       |
| 121 | 835342            | guanosine-3',5'-bis(diphosphate) 3'-pyrophosphohydrolase                         | spoT       | 0775          | 0712       | TK  |            | synonymous       |
| 122 | 837834            | bifunctional aconitate hydratase 2/2-mehtylisocitrate dehydrogenase              | acnB       | 0779          | 0716       | C   |            | synonymous       |
| 123 | 844793            | outer-membrane lipoprotein carrier protein                                       | lolA       | 0785          | 0722       | M   |            | synonymous       |
| 124 | 846604            | preprotein translocase subunit SecA                                              | secA       | 0786          | 0723       | U   |            | synonymous       |
| 125 | 862686            | GTP cyclohydrolase II                                                            | ribA       | 0802          | 0738       | H   |            | synonymous       |
| 126 | 879707            | excinuclease ABC subunit C                                                       | uvrC       | 0821          | 0760       | L   |            | synonymous       |
| 127 | 880049            | excinuclease ABC subunit C                                                       | uvrC       | 0821          | 0760       | L   |            | non-synonymous   |
| 128 | 906675            | putative type I restriction enzyme (specificity subunit)                         | hsdS_4     |               | 0726       | V   |            | synonymous       |
| 129 | 909006            | no annotation/ intergenic                                                        |            |               |            |     |            | intergenic       |
| 130 | 915502            | putative ADP-D-glycero-D-mannoheptose synthase                                   | waaE       | 0858          | 0792       | M   |            | synonymous       |
| 131 | 922177            | lipid-A-disaccharide synthase                                                    | lpxB       | 0867          | 0801       | M   |            | non-synonymous   |
| 132 | 926558            | CDP-diacylglycerol pyrophosphatase                                               | cdh        | 0871          | 0805       | I   |            | synonymous       |
| 133 | 951020            | hypothetical protein                                                             | HPAG1_0319 |               |            | -   |            | synonymous       |
| 134 | 960481            | phosphotransacetylase                                                            | pta        | 0904/<br>0905 | 0841       | C   |            | synonymous       |
| 135 | 967638            | putative ATP-dependent helicase                                                  | -          | 0911          | 0847       | L   |            | synonymous       |
| 136 | 991686            | no annotation/ intergenic                                                        |            |               |            |     |            | intergenic       |
| 137 | 997492            | hypothetical protein                                                             | -          | 0931/<br>0932 | 0866       | -   |            | synonymous       |
| 138 | 998449            | hypothetical protein                                                             | -          | 0934          | 0868       | O   |            | synonymous       |
| 139 | 1000301           | putative outer membrane protein                                                  | -          |               | 0870       | -   | hom        | synonymous       |
| 140 | 1012913           | hypothetical protein                                                             | -          | 0946          | 0880       | C   |            | synonymous       |
| 141 | 1019310           | putative aldehyde dehydrogenase                                                  | -          | 0954          | 0888       | C   |            | non-synonymous   |
| 142 | 1020026           | prolipoprotein diacylglyceryl transferase NAD(P)H-dependent glycerol-3-phosphate | lgt        | 0955          | 0889       | M   |            | non-synonymous   |
| 143 | 1025647           | dehydrogenase                                                                    | gpsA       | 0961          | 0895       | C   |            | synonymous       |
| 144 | 1027474           | hypothetical protein                                                             | -          | 0964          | 0898       | -   |            | synonymous       |
| 145 | 1048258           | no annotation/ intergenic                                                        |            |               |            |     |            | intergenic       |
| 146 | 1053300           | DNA transfer protein                                                             | virB4_3    |               | 0918       | U   |            | synonymous       |
| 147 | 1061772           | integrase/ recombinase (XERCD family)                                            | -          |               | 0951       | L   |            | non-synonymous   |
| 148 | 1063997           | hypothetical protein                                                             | -          |               | 0955       | S   |            | non-synonymous   |
| 149 | 1081534           | putative S/N-oxide reductase                                                     | -          | 0407          | 0974       | C   |            | synonymous       |
| 150 | 1085282           | nifS-like protein                                                                | -          | 0405          | 0976       | E   |            | synonymous       |

| No  | Position in NQ352 | Annotation <sup>a</sup>                                                       |      |           |            | COG | OMP family | type of mutation |
|-----|-------------------|-------------------------------------------------------------------------------|------|-----------|------------|-----|------------|------------------|
|     |                   | Description                                                                   | gene | HP-number | jhp-number |     |            |                  |
| 151 | 1086325           | phenylalanyl-tRNA synthetase subunit alpha                                    | pheS | 0403      | 0978       | J   |            | synonymous       |
| 152 | 1093112           | 30S ribosomal protein S1                                                      | rpsA | 0399      | 0982       | J   |            | non-synonymous   |
| 153 | 1097541           | hypothetical protein                                                          | -    | 0395      | 0986       | R   |            | synonymous       |
| 154 | 1097937           | hypothetical protein                                                          | -    | 0395      | 0986       | R   |            | synonymous       |
| 155 | 1108640           | hypothetical protein                                                          | -    | 0384      | 0997       | -   |            | synonymous       |
| 156 | 1110453           | putative zinc-metallo protease                                                | -    | 0382      | 0999       | O   |            | synonymous       |
| 157 | 1115513           | putative cytochrome C-type biogenesis protein                                 | -    | 0378      | 1003       | O   |            | non-synonymous   |
| 158 | 1141784           | putative dehydrogenase                                                        | -    | 1102      | 1028       | G   |            | non-synonymous   |
| 159 | 1147375           | putative outer membrane protein<br>pyruvate flavodoxin oxidoreductase subunit | -    | 1107      | 1034       | -   | hor        | non-synonymous   |
| 160 | 1148308           | gamma                                                                         | porG | 1108      | 1035       | C   |            | non-synonymous   |
| 161 | 1151649           | adenylosuccinate lyase                                                        | purB | 1112      | 1039       | F   |            | synonymous       |
| 162 | 1163417           | flagellar hook-associated protein FlgK                                        | flgK | 1119      | 1047       | N   |            | non-synonymous   |
| 163 | 1189103           | hypothetical protein                                                          | -    | 1146      | 1073       | S   |            | synonymous       |
| 164 | 1202342           | putative outer membrane protein                                               | -    | 1157      | 1084       | -   | hop        | synonymous       |
| 165 | 1206053           | flavodoxin FldA                                                               | fldA | 1161      | 1088       | C   |            | synonymous       |
| 166 | 1210705           | glucose-6-phosphate isomerase                                                 | pgi  | 1166      | 1093       | G   |            | synonymous       |
| 167 | 1212785           | putative outer membrane protein                                               | -    | 1167      | 1094       | -   | hof        | non-synonymous   |
| 168 | 1218390           | no annotation/ intergenic                                                     |      |           |            |     |            | intergenic       |
| 169 | 1223526           | putative outer membrane function                                              | -    | 1177      | 1103       | -   | hop        | non-synonymous   |
| 170 | 1233696           | sugar efflux transporter                                                      | -    | 1185      | 1111       | G   |            | synonymous       |
| 171 | 1245944           | DNA-directed RNA polymerase subunit<br>beta/beta'                             | rpoB | 1198      | 1121       | K   |            | non-synonymous   |
| 172 | 1247758           | DNA-directed RNA polymerase subunit<br>beta/beta'                             | rpoB | 1198      | 1121       | K   |            | synonymous       |
| 173 | 1250546           | DNA-directed RNA polymerase subunit<br>beta/beta'                             | rpoB | 1198      | 1121       | K   |            | non-synonymous   |
| 174 | 1260347           | ABC transporter ATP-binding protein                                           | -    | 1206      | 1129       | V   |            | synonymous       |
| 175 | 1264038           | ulcer-associated gene restriction endonuclease<br>(iceA)                      | -    | 1209      |            | -   |            | non-synonymous   |
| 176 | 1264353           | ulcer-associated gene restriction endonuclease<br>(iceA)                      | -    | 1209      |            | -   |            | non-synonymous   |
| 177 | 1267662           | polynucleotide phosphorylase/ polyadenylase                                   | pnp  | 1213      | 1136       | J   |            | non-synonymous   |
| 178 | 1274727           | D-lactate dehydrogenase                                                       | dld  | 1222      | 1143       | C   |            | non-synonymous   |
| 179 | 1282377           | aspartate kinase                                                              | lysC | 1229      | 1150       | E   |            | synonymous       |
| 180 | 1288843           | carbamoyl phosphate synthase small subunit                                    | carA | 1237      | 1158       | EF  |            | non-synonymous   |
| 181 | 1292287           | Maf-like protein                                                              | maf  | 1240      | 1161       | D   |            | synonymous       |
| 182 | 1292495           | alanyl-tRNA synthetase                                                        | alaS | 1241      | 1162       | J   |            | synonymous       |
| 183 | 1297979           | 30S ribosomal protein S18                                                     | rpsR | 1244      | 1165       | J   |            | synonymous       |
| 184 | 1298560           | single-strand DNA-binding protein                                             | ssb  | 1245      | 1166       | L   |            | non-synonymous   |
| 185 | 1299550           | DNA polymerase III subunit delta                                              | -    | 1247      | 1168       | L   |            | synonymous       |
| 186 | 1337959           | hypothetical protein                                                          | -    | 1285      | 1205       | R   |            | non-synonymous   |
| 187 | 1338296           | hypothetical protein                                                          | -    | 1285      | 1205       | R   |            | non-synonymous   |
| 188 | 1343138           | 50S ribosomal protein L17                                                     | rplQ | 1292      | 1212       | J   |            | synonymous       |
| 189 | 1347208           | preprotein translocase subunit SecY                                           | secY | 1300      | 1220       | U   |            | non-synonymous   |
| 190 | 1356280           | 50S ribosomal protein L3                                                      | rplC | 1319      | 1239       | J   |            | synonymous       |
| 191 | 1357816           | hypothetical protein                                                          | -    | 1321      | 1241       | R   |            | non-synonymous   |
| 192 | 1360179           | "putative" contains conserved domains sirD2                                   |      |           |            | -   |            | synonymous       |
| 193 | 1375835           | no annotation/ intergenic                                                     |      |           |            |     |            | intergenic       |
| 194 | 1383853           | hypothetical protein                                                          | -    | 1349      | 1268       | -   |            | synonymous       |
| 195 | 1389337           | hypothetical protein                                                          | -    | 1354      | 1272       | R   |            | non-synonymous   |
| 196 | 1392502           | nicotinate-nucleotide pyrophosphorylase                                       | nadC | 1355      | 1273       | H   |            | non-synonymous   |

| No  | Position in NQ352 | Annotation <sup>a</sup>                                  |                   | HP-number | jhp-number | COG | OMP family | type of mutation |
|-----|-------------------|----------------------------------------------------------|-------------------|-----------|------------|-----|------------|------------------|
|     |                   | Description                                              | gene              |           |            |     |            |                  |
| 197 | 1408261           | hypothetical protein                                     | -                 | 0996      | 0942       | U   |            | non-synonymous   |
| 198 | 1409913           | integrase/ recombinase (XERCD family)                    | -                 | 0995      | 0941       | L   |            | synonymous       |
| 199 | 1421074           | no annotation/ intergenic                                |                   |           |            |     |            | intergenic       |
| 200 | 1421319           | no annotation/ intergenic                                |                   |           |            |     |            | intergenic       |
| 201 | 1427842           | no annotation/ intergenic                                |                   |           |            |     |            | intergenic       |
| 202 | 1434481           | hypothetical protein                                     | -                 |           | 0928       | KL  |            | non-synonymous   |
| 203 | 1447227           | VirB8 type IV secretion protein- HPP12-1328              | virB8-2           |           |            | U   |            | non-synonymous   |
| 204 | 1458769           | UDP-N-acetylglucosamine acyltransferase                  | lpxA              | 1375      | 1289       | M   |            | synonymous       |
| 205 | 1460833           | hypothetical protein                                     | -                 | 1378      | 1292       | R   |            | synonymous       |
| 206 | 1463183           | ATP-dependet protease LA                                 | lon               | 1379      | 1293       | O   |            | non-synonymous   |
| 207 | 1472980           | no annotation/ intergenic                                |                   |           |            |     |            | intergenic       |
| 208 | 1474649           | no annotation/ intergenic                                |                   |           |            |     |            | intergenic       |
| 209 | 1476259           | no annotation/ intergenic                                |                   |           |            |     |            | intergenic       |
| 210 | 1482919           | hypothetical protein                                     | -                 | 1414      | 1309       | S   |            | non-synonymous   |
| 211 | 1483500           | tRNA delta(2)-isopentenylpyrophosphate transferase       | miaA              | 1415      | 1310       | J   |            | non-synonymous   |
| 212 | 1492610           | isoleucyl-tRNA synthetase                                | ileS              | 1422      | 1317       | J   |            | non-synonymous   |
| 213 | 1517551           | putative outer membrane protein                          | -                 | 1453      | 1346       | -   | hom        | synonymous       |
| 214 | 1534066           | ABC transporter ATP-binding protein                      | -                 | 1465      | 1358       | Q   |            | synonymous       |
| 215 | 1540661           | DNA polymerase I                                         | polA              | 1470      | 1363       | L   |            | synonymous       |
| 216 | 1540909           | DNA polymerase I                                         | polA              | 1470      | 1363       | L   |            | non-synonymous   |
| 217 | 1553504           | hypothetical protein                                     | -                 | 1481      | 1374       | R   |            | synonymous       |
| 218 | 1557027           | hypothetical protein                                     | -                 | 1486      | 1379       | -   |            | synonymous       |
| 219 | 1567341           | transaldolase                                            | tal               | 1495      | 1388       | G   |            | non-synonymous   |
| 220 | 1581888           | no annotation/ intergenic                                |                   |           |            |     |            | intergenic       |
| 221 | 1583145           | putative iron-regulated outer membrane protein           | frpB_3            | 1512      | 1405       | P   | family 4   | synonymous       |
| 222 | 1583643           | putative iron regulated outer membrane protein           | frpB_3            | 1512      | 1405       | P   | family 4   | synonymous       |
| 223 | 1599827           | hypothetical protein                                     | -                 | 1524      | 1413       | -   |            | synonymous       |
| 224 | 1601025           | exodeoxyribonuclease III                                 | exoA              | 1526      | 1415       | L   |            | non-synonymous   |
| 225 | 1601891           | hypothetical protein                                     | -                 | 1527      | 1416       | -   |            | non-synonymous   |
| 226 | 1609045           | putative type I restriction enzyme (specificity subunit) | hsdS_3a<br>HPAG1_ |           | 1422       | V   |            | non-synonymous   |
| 227 | 1620421           | amino acid permease - HPAG1-1471                         | 1471              |           |            | E   |            | synonymous       |
| 228 | 1624985           | hypothetical protein                                     | -                 | 1396      | 1431       | S   |            | non-synonymous   |
| 229 | 1626608           | hypothetical protein                                     | -                 | 1394      | 1433       | G   |            | non-synonymous   |
| 230 | 1626948           | hypothetical protein                                     | -                 | 1394      | 1433       | G   |            | synonymous       |
| 231 | 1627200           | hypothetical protein                                     | -                 | 1394      | 1433       | G   |            | synonymous       |
| 232 | 1633337           | DNA polymerase III subunit epsilon                       | -                 | 1387      | 1438       | L   |            | non-synonymous   |

<sup>a</sup> Annotation is based on an automatic annotation, generated with the Kodon software using the J99 annotation as a reference. The annotation of predicted ORFs with no homologue in J99 was done manually by means of BLAST searches. COG classifications are primarily based on J99 as of May 2010.

**Table S9: Clusters of nucleotide polymorphisms (CNPs)/ imports in strain pair NQ352/1701. Positions refer to the position in the virtual genome of the first isolate NQ352.**

| No | Position in NQ352 |       | Annotation <sup>a</sup>                                  | gene  | HP-number | jhp-number | COG | OMP | Import length |
|----|-------------------|-------|----------------------------------------------------------|-------|-----------|------------|-----|-----|---------------|
|    | start             | end   |                                                          |       |           |            |     |     |               |
| 1  | 7911              | 8580  | preprotein translocase subunit SecD                      | secD  | 1550      | 1449       | U   |     | 670           |
| 2  | 12791             | 12792 | leucyl-tRNA synthetase                                   | leuS  | 1547      | 1452       | J   |     | 2             |
| 3  | 25061             | 25370 | penicillin-binding protein                               | -     | 1556      | 1464       | M   |     | 310           |
| 4  | 26435             | 28206 | penicillin-binding protein                               | -     | 1556      | 1464       | M   |     | 1772          |
|    |                   |       | flagellar hook-basal body protein FliE                   | fliE  | 1557      | 1465       | NU  |     |               |
|    |                   |       | flagellar basal body rod protein FlgC                    | flgC  | 1558      | 1466       | N   |     |               |
|    |                   |       | flagellar basal body rod protein FlgB                    | flgB  | 1559      | 1467       | N   |     |               |
| 5  | 33208             | 33595 | penicillin-binding protein                               | -     | 1565      | 1473       | M   |     | 388           |
| 6  | 34667             | 34673 | penicillin-binding protein                               | -     | 1565      | 1473       | M   |     | 7             |
| 7  | 34889             | 35067 | penicillin-binding protein                               | -     | 1565      | 1473       | M   |     | 179           |
|    |                   |       | hypothetical protein                                     | -     | 1566      | 1474       | -   |     |               |
| 8  | 36416             | 37376 | hypothetical protein                                     | -     | 1568      | 1476       | S   |     | 961           |
|    |                   |       | hypothetical protein                                     | -     | 1569      | 1477       | -   |     |               |
|    |                   |       | hypothetical protein                                     | -     | 1570      | 1478       | R   |     |               |
| 9  | 38431             | 38527 | putative outer membrane protein                          | -     | 1571      | 1479       | M   |     | 97            |
| 10 | 38993             | 39438 | regulatory protein DniR                                  | dniR  | 1572      | 1480       | M   |     | 446           |
| 11 | 39993             | 40019 | hypothetical protein                                     | -     | 1573      | 1481       | L   |     | 27            |
| 12 | 40559             | 40639 | hypothetical protein                                     | -     | 1573      | 1481       | L   |     | 81            |
| 13 | 41785             | 43557 | ABC transporter ATP-binding protein                      | metN  | 1576      | 1484       | P   |     | 1773          |
|    |                   |       | ABC transporter, permease                                | -     | 1577      | 1485       | P   |     |               |
|    |                   |       | hypothetical protein                                     | -     | 1579      | 1486       | -   |     |               |
| 14 | 47841             | 48258 | putative DNA-binding/iron metalloprotein/AP endonuclease | ydiE  | 1584      | 1491       | O   |     | 418           |
|    |                   |       | flagellar basal body rod protein FlgG                    | flgG  | 1585      | 1492       | N   |     |               |
| 15 | 49422             | 51393 | hypothetical protein                                     | -     | 1587      | 1493       | S   |     | 1972          |
|    |                   |       | putative outer membrane protein                          | -     | 0009      | 0007       | -   | hop |               |
| 16 | 60136             | 60460 | putative outer membrane protein                          | -     | 0009      | 0007       | -   | hop | 325           |
| 17 | 61895             | 62950 | chaperonin GroEL                                         | groEL | 0010      | 0008       | O   |     | 1056          |
|    |                   |       | co-chaperonin GroES                                      | groES | 0011      | 0009       | O   |     |               |
| 18 | 64470             | 64874 | DNA primase                                              | dnaG  | 0012      | 0010       | L   |     | 405           |
| 19 | 74583             | 74987 | lipid A 1-phosphatase                                    | -     | 0021      | 0019       | I   |     | 405           |
|    |                   |       | lipid A phosphoethanolamine transferase                  | -     | 0022      | 0020       | R   |     |               |
| 20 | 75482             | 76109 | lipid A phosphoethanolamine transferase                  | -     | 0022      | 0020       | R   |     | 628           |
| 21 | 76322             | 77912 | putative outer membrane protein                          | -     | 0025      | 0021       | -   | hop | 1591          |
| 22 | 78540             | 79048 | putative outer membrane protein                          | -     | 0025      | 0021       | -   | hop | 509           |
| 23 | 81187             | 82459 | isocitrate dehydrogenase                                 | icd   | 0027      | 0023       | C   |     | 1273          |
|    |                   |       | hypothetical protein                                     | -     | 0028      | 0024       | -   |     |               |
| 24 | 83068             | 85153 | dethiobiotin synthetase                                  | bioD  | 0029      | 0025       | H   |     | 2086          |
|    |                   |       | hypothetical protein                                     | -     | 0030      | 0026       | -   |     |               |
|    |                   |       | hypothetical protein                                     | -     | 0031      | 0027       | -   |     |               |
| 25 | 85536             | 86341 | hypothetical protein                                     | -     | 0032      | 0028       | S   |     | 806           |
|    |                   |       | ATP-dependent protease, ATP-binding subunit              | clpA  | 0033      | 0029       | O   |     |               |
| 26 | 88247             | 89332 | aspartate alpha-decarboxylase                            | panD  | 0034      | 0030       | H   |     | 1086          |

| No | Position in NQ352 |        | Annotation <sup>a</sup>                                |      |               |            | COG | OMP | Import length |
|----|-------------------|--------|--------------------------------------------------------|------|---------------|------------|-----|-----|---------------|
|    | start             | end    | Description                                            | gene | HP-number     | jhp-number |     |     |               |
|    |                   |        | hypothetical protein                                   | -    | 0035          | 0031       | S   |     |               |
|    |                   |        | hypothetical protein                                   | -    | 0036          | 0032       | -   |     |               |
| 27 | 95109             | 95692  | phosphomannose isomerase/GDP-mannose pyrophosphorylase | manC | 0043          | 0037       | M   |     | 584           |
|    |                   |        | GDP-D-mannose dehydratase                              | gmd  | 0044          | 0038       | M   |     |               |
| 28 | 95941             | 96265  | GDP-D-mannose dehydratase                              | gmd  | 0044          | 0038       | M   |     | 325           |
| 29 | 96725             | 97088  | putative sugar nucleotide biosynthesis                 | -    | 0045          | 0039       | MG  |     | 364           |
| 30 | 99088             | 99903  | hydrogenase expression/ formation protein              | hypE | 0047          | 0040       | O   |     | 816           |
|    |                   |        | putative transcriptional regulator                     | -    | 0048          | 0041       | O   |     |               |
| 31 | 109356            | 111378 | sodium/proline symporter                               | putP | 0055          | 0047       | ER  |     | 2023          |
|    |                   |        | proline/pyrroline-5-carboxylate dehydrogenase          | putA | 0056          | 0048       | C   |     |               |
| 32 | 114441            | 114761 | proline/pyrroline-5-carboxylate dehydrogenase          | putA | 0056          | 0048       | C   |     | 321           |
| 33 | 114982            | 115248 | hypothetical protein                                   | -    | 0057          | 0049       | -   |     | 267           |
| 34 | 121242            | 121334 | hypothetical protein                                   | -    | 0063          | 0058       | -   |     | 93            |
| 35 | 122544            | 122608 | hypothetical protein                                   | -    | 0066          | 0061       | D   |     | 65            |
| 36 | 125854            | 125923 | urease accessory protein                               | ureG | 0068          | 0063       | OK  |     | 70            |
| 37 | 126202            | 127138 | urease accessory protein                               | ureF | 0069          | 0064       | O   |     | 937           |
|    |                   |        | urease accessory protein UreE                          | ureE | 0070          | 0065       | O   |     |               |
| 38 | 127568            | 127589 | urea transporter                                       | ureI | 0071          | 0066       | -   |     | 22            |
| 39 | 132136            | 132139 | phosphoglucosamine mutase                              | glmM | 0075          | 0070       | G   |     | 4             |
| 40 | 132469            | 132781 | phosphoglucosamine mutase                              | glmM | 0075          | 0070       | G   |     | 313           |
| 41 | 133142            | 133399 | 30S ribosomal protein S20                              | rpsT | 0076          | 0071       | J   |     | 258           |
|    |                   |        | peptide chain release factor 1                         | prfA | 0077          | 0072       | J   |     |               |
| 42 | 133739            | 133907 | peptide chain release factor 1                         | prfA | 0077          | 0072       | J   |     | 169           |
| 43 | 134120            | 134823 | peptide chain release factor 1                         | prfA | 0077          | 0072       | J   |     | 704           |
|    |                   |        | putative outer membrane protein                        | -    | 0078/<br>0079 | 0073       | -   | hor |               |
| 44 | 135078            | 135507 | putative outer membrane protein                        | -    | 0078/<br>0079 | 0073       | -   | hor | 430           |
| 45 | 136249            | 136978 | hypothetical protein                                   | -    | 0080          | 0074       | -   |     | 730           |
| 46 | 137278            | 138488 | hypothetical protein                                   | -    | 0080          | 0074       | -   |     | 1211          |
|    |                   |        | methyl-accepting chemotaxis protein (MCP)              | -    | 0082          | 0075       | NT  |     |               |
| 47 | 138749            | 140217 | methyl-accepting chemotaxis protein (MCP)              | -    | 0082          | 0075       | NT  |     | 1469          |
| 48 | 140430            | 140608 | 30S ribosomal protein S9                               | rpsI | 0083          | 0076       | J   |     | 179           |
| 49 | 140821            | 142491 | 50S ribosomal protein L13                              | rplM | 0084          | 0077       | J   |     | 1671          |
|    |                   |        | hypothetical protein                                   | -    | 0085          | 0078       | -   |     |               |
|    |                   |        | hypothetical protein                                   | -    | 0086          | 0079       | R   |     |               |
| 50 | 143568            | 143850 | hypothetical protein                                   | -    | 0087          | 0080       | M   |     | 283           |
| 51 | 151846            | 153050 | hypothetical protein                                   | -    | 0095          | 0087       | -   |     | 1205          |
|    |                   |        | 2-hydroxyacid dehydrogenase                            | -    | 0096          | 0088       | CHR |     |               |
| 52 | 155668            | 156054 | methyl-accepting chemotaxis protein (MCP)              | -    | 0099          | 0091       | NT  |     | 387           |
| 53 | 156674            | 156684 | methyl-accepting chemotaxis protein (MCP)              | -    | 0099          | 0091       | NT  |     | 11            |
| 54 | 157420            | 158271 | methyl-accepting chemotaxis protein (MCP)              | -    | 0099          | 0091       | NT  |     | 852           |
|    |                   |        | hypothetical protein                                   | -    | 0100          | 0092       | S   |     |               |



| No | Position in NQ352 |        | Annotation <sup>a</sup>                                          |        | gene | HP-number     | jhp-number | COG | OMP | Import length |
|----|-------------------|--------|------------------------------------------------------------------|--------|------|---------------|------------|-----|-----|---------------|
|    | start             | end    | Description                                                      |        |      |               |            |     |     |               |
| 55 | 167196            | 167224 | hypothetical protein                                             | -      |      | 0108          | 0100       | -   |     | 29            |
| 56 | 170011            | 170012 | 24kDa chaperone                                                  | grpE   |      | 0110          | 0102       | O   |     | 2             |
| 57 | 170389            | 170394 | 24kDa chaperone                                                  | grpE   |      | 0110          | 0102       | O   |     | 6             |
| 58 | 170680            | 170692 | heat-inducible transcription repressor                           | -      |      | 0111          | 0103       | K   |     | 13            |
| 59 | 173294            | 173342 | hypothetical protein                                             | -      |      | 0114          | 0106       | S   |     | 49            |
| 60 | 177148            | 178084 | DNA topoisomerase I                                              | topA_1 |      | 0116          | 0108       | L   |     | 937           |
| 61 | 180467            | 183244 | hypothetical protein                                             | -      |      | 0118          | 0110       | -   |     | 2778          |
|    |                   |        | phosphoenolpyruvate synthase                                     | ppsA   |      | 0121          | 0111       | G   |     |               |
| 62 | 183468            | 184108 | hypothetical protein                                             | -      |      | 0122          | 0112       | -   |     | 641           |
|    |                   |        | threonyl-tRNA synthetase                                         | thrS   |      | 0123          | 0113       | J   |     |               |
| 63 | 185616            | 185835 | translation initiation factor IF-3                               | infC   |      | 0124          | 0114       | J   |     | 220           |
| 64 | 193037            | 197473 | phospho-2-dehydro-3-deoxyheptonate aldolase                      | aroF   |      | 0134          | 0122       | E   |     | 4437          |
|    |                   |        | hypothetical protein                                             | -      |      | 0135          | 0123       | -   |     |               |
|    |                   |        | bactoferritin comigratory protein                                | bcp    |      | 0136          | 0124       | O   |     |               |
|    |                   |        | hypothetical protein                                             | -      |      | 0137          | 0125       | S   |     |               |
|    |                   |        | putative iron-sulfur protein                                     | -      |      | 0138          | 0126       | C   |     |               |
| 65 | 198794            | 200670 | L-lactate permease                                               | lldP_1 |      | 0140          | 0128       | C   |     | 1877          |
|    |                   |        | L-lactate permease                                               | lldP_2 |      | 0141          | 0129       | C   |     |               |
| 66 | 201100            | 202285 | L-lactate permease                                               | lldP_2 |      | 0141          | 0129       | C   |     | 1186          |
|    |                   |        | DNA glycosylase MutY                                             | mutY   |      | 0142          | 0130       | L   |     |               |
| 67 | 205554            | 208616 | cytochrome oxidase (CBB3- type)                                  | fixN   |      | 0144          | 0132       | O   |     | 3063          |
|    |                   |        | cytochrome oxidase (CBB3- type)                                  | fixO   |      | 0145          | 0133       | C   |     |               |
|    |                   |        | putative cytochrome oxidase (CBB3- type)                         | fixQ   |      | 0146          | 0134       | O   |     |               |
|    |                   |        | cytochrome oxidase (CBB3-type)                                   | fixP   |      | 0147          | 0135       | C   |     |               |
|    |                   |        | hypothetical protein                                             | -      |      | 0148          | 0136       | -   |     |               |
|    |                   |        | hypothetical protein                                             | -      |      | 0149          | 0137       | -   |     |               |
| 68 | 208833            | 209734 | hypothetical protein                                             | -      |      | 0150          | 0138       | -   |     | 902           |
| 69 | 211562            | 212132 | hypothetical protein                                             | -      |      | 0152          | 0140       | R   |     | 571           |
|    |                   |        | recombinase A                                                    | recA   |      | 0153          | 0141       | L   |     |               |
| 70 | 213948            | 215838 | phosphopyruvate hydratase                                        | eno    |      | 0154          | 0142       | G   |     | 1891          |
|    |                   |        | hypothetical protein                                             | -      |      | 0155          | 0143       | -   |     |               |
|    |                   |        | hypothetical protein                                             | -      |      | 0156          | 0144       | -   |     |               |
|    |                   |        | shikimate kinase                                                 | aroK   |      | 0157          | 0145       | E   |     |               |
|    |                   |        | hypothetical protein                                             | -      |      | 0158          | 0146       | -   |     |               |
| 71 | 217026            | 217067 | putative lipopolysaccharide biosynthesis protein                 | -      |      | 0159          | 0147       | M   |     | 42            |
| 72 | 219566            | 219674 | hypothetical protein                                             | -      |      | 0162          | 0149       | S   |     | 109           |
| 73 | 221645            | 222332 | putative histidine kinase sensor protein                         | -      |      | 0164/<br>0165 | 0151       | T   |     | 688           |
| 74 | 243454            | 244816 | putative cardiolipin synthase                                    | -      |      | 0190          | 0176       | I   |     | 1363          |
|    |                   |        | fumarate reductase iron-sulfur subunit                           | frdB   |      | 0191          | 0177       | C   |     |               |
| 75 | 246701            | 247379 | fumarate reductase flavoprotein subunit                          | frdA   |      | 0192          | 0178       | C   |     | 679           |
| 76 | 256387            | 256672 | hypothetical protein                                             | -      |      | 0204          | 0190       | -   |     | 286           |
| 77 | 257273            | 257559 | hypothetical protein                                             | -      |      | 0205          | 0191       | E   |     | 287           |
| 78 | 263114            | 263601 | putative outer membrane protein                                  | -      |      | 0209          | 0195       | -   | hof | 488           |
| 79 | 269183            | 269718 | tRNA uridine 5-carboxymethylaminomethyl modification enzyme GidA | gidA   |      | 0213          | 0199       | D   |     | 536           |

| No  | Position in NQ352 |        | Annotation <sup>a</sup><br>Description                                                                                                                                               | gene                            | HP-<br>number                                | jhp-<br>number                               | COG                        | OMP     | Import<br>length |
|-----|-------------------|--------|--------------------------------------------------------------------------------------------------------------------------------------------------------------------------------------|---------------------------------|----------------------------------------------|----------------------------------------------|----------------------------|---------|------------------|
|     | start             | end    |                                                                                                                                                                                      |                                 |                                              |                                              |                            |         |                  |
| 80  | 270802            | 270937 | putative transporter                                                                                                                                                                 | -                               | 0214                                         | 0200                                         | P                          |         | 136              |
| 81  | 271573            | 272383 | putative transporter<br>CDP-diacylglycerol synthase                                                                                                                                  | -<br>cdsA                       | 0214<br>0215                                 | 0200<br>0201                                 | P<br>I                     |         | 811              |
| 82  | 274110            | 274592 | hypothetical protein                                                                                                                                                                 | -                               | 0218                                         | 0204                                         | R                          |         | 483              |
| 83  | 285396            | 286188 | hypothetical protein<br>outer membrane protein/porin                                                                                                                                 | -<br>hopA                       | 0228<br>0229                                 | 0213<br>0214                                 | P<br>-                     | <br>hop | 793              |
| 84  | 286464            | 286473 | outer membrane protein/porin                                                                                                                                                         | hopA                            | 0229                                         | 0214                                         | -                          | hop     | 10               |
| 85  | 287741            | 287901 | 3-deoxy-manno-octulosonate<br>cytidyltransferase                                                                                                                                     | kdsB                            | 0230                                         | 0215                                         | M                          |         | 161              |
| 86  | 294608            | 295008 | prolyl-tRNA synthetase                                                                                                                                                               | proS                            | 0238                                         | 0223                                         | J                          |         | 401              |
| 87  | 295350            | 295365 | prolyl-tRNA synthetase                                                                                                                                                               | proS                            | 0238                                         | 0223                                         | J                          |         | 16               |
| 88  | 298003            | 298006 | putative octaprenyl-diphosphate synthase                                                                                                                                             | ispB                            | 0240                                         | 0225                                         | H                          |         | 4                |
| 89  | 299272            | 299667 | neutrophil-activating protein A                                                                                                                                                      | napA                            | 0243                                         | 0228                                         | P                          |         | 396              |
| 90  | 300246            | 300599 | putative histidine kinase sensor protein                                                                                                                                             | -                               | 0244                                         | 0229                                         | T                          |         | 354              |
| 91  | 306479            | 306749 | ABC transporter, ATP-binding protein                                                                                                                                                 | -                               | 0250                                         | 0235                                         | R                          |         | 271              |
| 92  | 308405            | 308498 | no annotation / intergenic                                                                                                                                                           |                                 |                                              |                                              |                            |         | 94               |
| 93  | 308735            | 308911 | putative outer membrane protein                                                                                                                                                      | -                               | 0252                                         | 0237                                         | -                          | hop     | 177              |
| 94  | 309253            | 309336 | putative outer membrane protein                                                                                                                                                      | -                               | 0252                                         | 0237                                         | -                          | hop     | 84               |
| 95  | 309652            | 309718 | putative outer membrane protein                                                                                                                                                      | -                               | 0252                                         | 0237                                         | -                          | hop     | 67               |
| 96  | 311044            | 311370 | putative outer membrane protein                                                                                                                                                      | -                               | 0253/<br>0254                                | 0238                                         | -                          | hop     | 327              |
| 97  | 311581            | 311884 | putative outer membrane protein<br>adenylosuccinate synthetase                                                                                                                       | -<br>purA                       | 0253/<br>0254<br>0255                        | 0238<br>0239                                 | -<br>F                     | hop     | 304              |
| 98  | 317478            | 317590 | type II DNA modification enzyme<br>(methyltransferase)<br>hypothetical protein                                                                                                       | -<br>-                          | 0260<br>0261                                 | 0244<br>0245                                 | L<br>-                     |         | 113              |
| 99  | 320312            | 321199 | heat shock protein                                                                                                                                                                   | clpB                            | 0264                                         | 0249                                         | O                          |         | 888              |
| 100 | 324213            | 324869 | dihydroorotase<br>chlorohydrolase                                                                                                                                                    | pyrC_1<br>orf1                  | 0266<br>0267                                 | 0251<br>0252                                 | F<br>FR                    |         | 657              |
| 101 | 330540            | 330698 | hypothetical protein                                                                                                                                                                 | -                               | 0275                                         | 0260                                         | G                          |         | 159              |
| 102 | 331972            | 332044 | hypothetical protein                                                                                                                                                                 | -                               | 0276                                         | 0261                                         | -                          |         | 73               |
| 103 | 333504            | 335533 | guanosine -5'-triphosphate,3'-diphosphate<br>pyrophosphatase<br>lipopolysaccharide heptosyltransferase-1<br>lipid A biosynthesis lauroyl acyltransferase                             | gppA<br>waaC<br>waaM            | 0278<br>0279<br>0280                         | 0263<br>0264<br>0265                         | FP<br>M<br>M               |         | 2030             |
| 104 | 341241            | 345633 | hypothetical protein<br>hypothetical protein<br>ATP-dependent zinc metallopeptidase<br>hypothetical protein<br>hypothetical protein<br>putative vacuolating cytotoxin (VacA) paralog | -<br>-<br>ftsH_1<br>-<br>-<br>- | 0284<br>0285<br>0286<br>0287<br>0288<br>0289 | 0269<br>0270<br>0271<br>0272<br>0273<br>0274 | M<br>J<br>O<br>-<br>-<br>N |         | 4393             |
| 105 | 351116            | 351119 | putative vacuolating cytotoxin (VacA) paralog                                                                                                                                        | -                               | 0289                                         | 0274                                         | N                          |         | 4                |
| 106 | 351455            | 351594 | putative vacuolating cytotoxin (VacA) paralog                                                                                                                                        | -                               | 0289                                         | 0274                                         | N                          |         | 140              |
| 107 | 352305            | 353450 | putative vacuolating cytotoxin (VacA) paralog                                                                                                                                        | -                               | 0289                                         | 0274                                         | N                          |         | 1146             |
| 108 | 354059            | 355309 | putative vacuolating cytotoxin (VacA) paralog                                                                                                                                        | -                               | 0289                                         | 0274                                         | N                          |         | 1251             |

| No  | Position in NQ352 |        | Annotation <sup>a</sup><br>Description                  | gene | HP-<br>number | jhp-<br>number | COG | OMP | Import<br>length |
|-----|-------------------|--------|---------------------------------------------------------|------|---------------|----------------|-----|-----|------------------|
|     | start             | end    |                                                         |      |               |                |     |     |                  |
|     |                   |        | diaminopimelate decarboxylase                           | lysA | 0290          | 0275           | E   |     |                  |
| 109 | 355560            | 355562 | hypothetical protein                                    | -    | 0291          | 0276           | E   |     | 3                |
| 110 | 360771            | 360804 | flagellar hook-associated protein FlgL                  | flgL | 0295          | 0280           | N   |     | 34               |
| 111 | 361251            | 362066 | flagellar hook-associated protein FlgL                  | flgL | 0295          | 0280           | N   |     | 816              |
| 112 | 365805            | 367359 | dipeptide ABC transporter permease                      | dppC | 0300          | 0285           | EP  |     | 1555             |
|     |                   |        | peptide ABC transporter ATP-binding protein             | dppD | 0301          | 0286           | EP  |     |                  |
| 113 | 370000            | 370532 | hypothetical protein                                    | -    | 0304          | 0289           | -   |     | 533              |
| 114 | 375265            | 375472 | hypothetical protein                                    | -    | 0311          | 0296           | -   |     | 208              |
| 115 | 379743            | 379890 | hypothetical protein                                    | -    | 0318          | 0301           | P   |     | 148              |
| 116 | 380474            | 380565 | hypothetical protein                                    | -    | 0318          | 0301           | P   |     | 92               |
|     |                   |        | arginyl-tRNA synthetase                                 | argS | 0319          | 0302           | J   |     |                  |
| 117 | 381519            | 382423 | arginyl-tRNA synthetase                                 | argS | 0319          | 0302           | J   |     | 905              |
|     |                   |        | hypothetical protein                                    | -    | 0320          | 0303           | U   |     |                  |
| 118 | 384040            | 384475 | poly E-rich protein                                     | -    | 0322          | 0305           | -   |     | 436              |
| 119 | 386824            | 386945 | CMP-N-acetylneuraminic acid synthetase (neuA)           | -    | 0326          | 0309           | M   |     | 122              |
| 120 | 387588            | 392316 | CMP-N-acetylneuraminic acid synthetase (neuA)           | -    | 0326          | 0309           | M   |     | 4729             |
|     |                   |        | putative flagellar biosynthesis protein                 | flaG | 0327          | 0310           | J   |     |                  |
|     |                   |        | tetraacyldisaccharide 4'-kinase                         | lpxK | 0328          | 0311           | M   |     |                  |
|     |                   |        | NAD synthetase                                          | nadE | 0329          | 0312           | H   |     |                  |
|     |                   |        | ketol-acid reductoisomerase                             | ilvC | 0330          | 0313           | EH  |     |                  |
|     |                   |        | cell division inhibitor                                 | minD | 0331          | 0314           | D   |     |                  |
| 121 | 392874            | 392877 | hypothetical protein                                    | -    | 0333          | 0316           | LU  |     | 4                |
| 122 | 394850            | 397160 | hypothetical protein                                    | -    | 0337          | 0319           | -   |     | 2311             |
|     |                   |        | hypothetical protein                                    | -    | 0338          | 0320           | -   |     |                  |
|     |                   |        | hypothetical protein                                    | -    | 0347          | 0321           | J   |     |                  |
|     |                   |        | putative single-stranded -DNA-specific exonuclease RecJ | recJ | 0348          | 0322           | L   |     |                  |
| 123 | 402842            | 403956 | flagellar motor switch protein G                        | fliG | 0352          | 0326           | N   |     | 1115             |
|     |                   |        | flagellar assembly protein H                            | fliH | 0353          | 0327           | NU  |     |                  |
| 124 | 404189            | 405272 | 1-deoxy-D-xylulose-5-phosphate synthase                 | dxs  | 0354          | 0328           | HI  |     | 1084             |
| 125 | 416114            | 416197 | hypothetical protein                                    | -    | 1089          | 0336           | L   |     | 84               |
| 126 | 416957            | 417258 | hypothetical protein                                    | -    | 1089          | 0336           | L   |     | 302              |
|     |                   |        | transketolase                                           | tktA | 1088          | 0337           | G   |     |                  |
| 127 | 418878            | 419032 | transketolase                                           | tktA | 1088          | 0337           | G   |     | 155              |
| 128 | 421604            | 422834 | aspartate carbamoyltransferase catalytic subunit        | pyrB | 1084          | 0341           | F   |     | 1231             |
|     |                   |        | putative outer membrane protein                         | -    | 1083          | 0342           | -   | hof |                  |
| 129 | 423375            | 423380 | putative outer membrane protein                         | -    | 1083          | 0342           | -   | hof | 6                |
| 130 | 423898            | 424298 | multi-drug resistance protein                           | msbA | 1082          | 0343           | V   |     | 401              |
| 131 | 431088            | 432499 | hypothetical protein                                    | -    | 1075          | 0350           | R   |     | 1412             |
|     |                   |        | hypothetical protein                                    | -    | 1074          | 0351           | -   |     |                  |
| 132 | 433742            | 434079 | copper-transporting P-type ATPase                       | copA | 1072          | 0353           | P   |     | 338              |
| 133 | 434286            | 434832 | copper-transporting P-type ATPase                       | copA | 1072          | 0353           | P   |     | 547              |
| 134 | 435608            | 435800 | phosphatidylserine synthase                             | pssA | 1071          | 0354           | I   |     | 193              |
| 135 | 443583            | 443758 | sec-independent translocase                             | -    | 1060          | 0365           | U   |     | 176              |
| 136 | 448426            | 448720 | hypothetical protein                                    | -    | 1055          | 0370           | -   |     | 295              |

| No  | Position in NQ352 |        | Annotation <sup>a</sup>                                      |        |           |            |    | COG | OMP  | Import length |
|-----|-------------------|--------|--------------------------------------------------------------|--------|-----------|------------|----|-----|------|---------------|
|     | start             | end    | Description                                                  | gene   | HP-number | jhp-number |    |     |      |               |
|     |                   |        | hypothetical protein                                         | -      | 1054      | 0371       | M  |     |      |               |
| 137 | 448947            | 449527 | hypothetical protein                                         | -      | 1054      | 0371       | M  |     | 581  |               |
| 138 | 449729            | 449885 | hypothetical protein                                         | -      | 1054      | 0371       | M  |     | 157  |               |
|     |                   |        | septum formation inhibitor                                   | minC   | 1053      | 0372       | D  |     |      |               |
| 139 | 450221            | 450680 | septum formation inhibitor                                   | minC   | 1053      | 0372       | D  |     | 460  |               |
|     |                   |        | UDP-3-O-[3-hydroxymyristoyl] N-acetylglucosamine deacetylase | lpxC   | 1052      | 0373       | M  |     |      |               |
| 140 | 451489            | 451737 | hypothetical protein                                         | -      | 1051      | 0374       | O  |     | 249  |               |
| 141 | 454593            | 455784 | translation initiation factor IF-2                           | infB   | 1048      | 0377       | J  |     | 1192 |               |
| 142 | 457010            | 457227 | acetyl-coA synthetase                                        | -      | 1045      |            | I  |     | 218  |               |
| 143 | 457704            | 457995 | acetyl-coA synthetase                                        | -      | 1045      |            | I  |     | 292  |               |
| 144 | 459242            | 459299 | hypothetical protein                                         | -      | 1044      | 0380       | R  |     | 58   |               |
| 145 | 460116            | 460701 | putative transcriptional regulator                           | -      | 1043      | 0381       | TK |     | 586  |               |
| 146 | 463705            | 468397 | flagellar biosynthesis protein FlhA                          | flhA   | 1041      | 0383       | NU |     | 4693 |               |
|     |                   |        | 30S ribosomal protein S15                                    | rpsO   | 1040      | 0384       | J  |     |      |               |
|     |                   |        | hypothetical protein                                         | -      | 1039      | 0385       | M  |     |      |               |
|     |                   |        | 3-dehydroquinase dehydratase                                 | aroD   | 1038      | 0386       | E  |     |      |               |
|     |                   |        | putative proline peptidase                                   | pepQ   | 1037      | 0387       | E  |     |      |               |
| 147 | 472642            | 472747 | flagellar motor switch protein FliM                          | fliM   | 1031      | 0393       | N  |     | 106  |               |
| 148 | 473083            | 474187 | flagellar motor switch protein FliM                          | fliM   | 1031      | 0393       | N  |     | 1105 |               |
|     |                   |        | flagellar motor switch protein FliY                          | -      | 1030      | 0394       | NT |     |      |               |
| 149 | 483537            | 483975 | protease DO                                                  | htrA   | 1019      | 0405       | O  |     | 439  |               |
| 150 | 485033            | 485896 | amino acid permease                                          | -      | 1017      | 0406       | E  |     | 864  |               |
| 151 | 489111            | 492003 | dihydrodipicolinate synthase                                 | dapA   | 1013      | 0410       | EM |     | 2893 |               |
|     |                   |        | putative zinc protease                                       | -      | 1012      | 0411       | R  |     |      |               |
|     |                   |        | dihydroorotate dehydrogenase 2                               | pyrD   | 1011      | 0412       | F  |     |      |               |
|     |                   |        | polyphosphate kinase                                         | ppk    | 1010      | 0413       | P  |     |      |               |
| 152 | 492803            | 493617 | polyphosphate kinase                                         | ppk    | 1010      | 0413       | P  |     | 815  |               |
| 153 | 496592            | 499771 | type I restriction enzyme (modification subunit)             | hsdM_1 | 0463      | 0415       | V  |     | 3180 |               |
|     |                   |        | type I restriction enzyme R protein (hsdR)                   | -      | 0464      | 0416       | V  |     |      |               |
| 154 | 500844            | 500857 | hypothetical protein                                         | -      | 0465      | 0417       | S  |     | 14   |               |
| 155 | 502970            | 504228 | hypothetical protein                                         | -      | 0467      | 0419       | -  |     | 1259 |               |
|     |                   |        | hypothetical protein                                         | -      | 0468      | 0420       | C  |     |      |               |
| 156 | 504629            | 504863 | hypothetical protein                                         | -      | 0469      | 0421       | -  |     | 235  |               |
| 157 | 507323            | 507446 | glutathione-regulated potassium-efflux system protein        | kefB   | 0471      | 0423       | P  |     | 124  |               |
| 158 | 507959            | 508835 | glutathione-regulated potassium-efflux system protein        | kefB   | 0471      | 0423       | P  |     | 877  |               |
|     |                   |        | putative outer membrane protein                              | -      | 0472      | 0424       | -  | hor |      |               |
| 159 | 511542            | 511746 | glutamyl-tRNA synthetase                                     | gltX   | 0476      | 0428       | J  |     | 205  |               |
| 160 | 513657            | 514894 | type II DNA modification enzyme (methyltransferase)          | -      | 0478      | 0430       | L  |     | 1238 |               |
|     |                   |        | hypothetical protein                                         | -      | 0479      | 0431       | M  |     |      |               |
| 161 | 521315            | 521323 | hypothetical protein                                         | -      | 0485      | 0437       | P  |     | 9    |               |
| 162 | 548648            | 548654 | putative glycolate oxidase                                   | glcD   | 0509      | 0459       | C  |     | 7    |               |
| 163 | 548873            | 550323 | putative glycolate oxidase                                   | glcD   | 0509      | 0459       | C  |     | 1451 |               |
|     |                   |        | dihydrodipicolinate reductase                                | dapB   | 0510      | 0460       | E  |     |      |               |
| 164 | 551883            | 551889 | glutamine synthetase                                         | glnA   | 0512      | 0461       | E  |     | 7    |               |

| No  | Position in NQ352 |        | Annotation <sup>a</sup><br>Description                                          | gene       | HP-number     | jhp-number | COG | OMP | Import length |
|-----|-------------------|--------|---------------------------------------------------------------------------------|------------|---------------|------------|-----|-----|---------------|
|     | start             | end    |                                                                                 |            |               |            |     |     |               |
| 165 | 555576            | 556850 | 50S ribosomal protein L9                                                        | rplI       | 0514          | 0463       | J   |     | 1275          |
|     |                   |        | ATP-dependent protease peptidase subunit                                        | hslV       | 0515          | 0464       | O   |     |               |
|     |                   |        | ATP-dependent protease ATP-binding subunit HslU                                 | hslU       | 0516          | 0465       | O   |     |               |
| 166 | 567575            | 567930 | cag island protein, DNA transfer protein                                        | virB11_1   | 0525          | 0474       | NU  |     | 356           |
|     |                   |        | cag island protein                                                              | orf12      | 0526          | 0475       | -   |     |               |
| 167 | 590359            | 590383 | DNA transfer protein                                                            | cagE       | 0544          | 0492       | U   |     | 25            |
| 168 | 591958            | 592953 | cag island protein                                                              | cagC       | 0546          | 0494       | -   |     | 996           |
|     |                   |        | cag pathogenicity island protein B                                              | HPAG1_0523 |               |            | -   |     |               |
| 169 | 605363            | 605714 | 3-oxoacyl-(acyl carrier protein) synthase II                                    | fabB       | 0558          | 0505       | IQ  |     | 352           |
| 170 | 608934            | 610055 | hypothetical protein                                                            | -          | 0563          | 0510       | -   |     | 1122          |
|     |                   |        | hypothetical protein                                                            | -          | 0564          | 0511       | -   |     |               |
|     |                   |        | hypothetical protein                                                            | -          | 0565          | 0512       | S   |     |               |
| 171 | 620695            | 622759 | methylenetetrahydrofolate dehydrogenase/methenyltetrahydrofolate cyclohydrolase | folD       | 0577          | 0524       | H   |     | 2065          |
|     |                   |        | hypothetical protein                                                            | -          | 0578          | 0525       | M   |     |               |
| 172 | 623267            | 623523 | hypothetical protein                                                            | -          | 0578          | 0525       | M   |     | 257           |
|     |                   |        | hypothetical protein                                                            | -          | 0579          | 0526       | -   |     |               |
| 173 | 623766            | 623803 | hypothetical protein                                                            | -          | 0579          | 0526       | -   |     | 38            |
| 174 | 637187            | 637396 | hypothetical protein                                                            | -          |               | 0540       | R   |     | 210           |
| 175 | 650432            | 651140 | uroporphyrinogen decarboxylase                                                  | hemE       | 0604          | 0551       | H   |     | 709           |
| 176 | 659156            | 659186 | putative vacuolating cytotoxin (VacA) paralog                                   | -          | 0609/<br>0610 | 0556       | N   |     | 31            |
| 177 | 660011            | 660034 | putative vacuolating cytotoxin (VacA) paralog                                   | -          | 0609/<br>0610 | 0556       | N   |     | 24            |
| 178 | 662753            | 663776 | putative vacuolating cytotoxin (VacA) paralog                                   | -          | 0609/<br>0610 | 0556       | N   |     | 1024          |
| 179 | 667090            | 667275 | no annotation / intergenic                                                      |            |               |            |     |     | 186           |
| 180 | 667623            | 671079 | hypothetical protein                                                            | -          | 0614          | 0557       | -   |     | 3457          |
|     |                   |        | NAD-dependent DNA ligase LigA                                                   | ligA       | 0615          | 0558       | L   |     |               |
|     |                   |        | putative chemotaxis protein                                                     | cheV_2     | 0616          | 0559       | NT  |     |               |
|     |                   |        | aspartyl-tRNA synthetase                                                        | aspS       | 0617          | 0560       | J   |     |               |
| 181 | 675270            | 675471 | putative lipopolysaccharide biosynthesis protein                                | -          | 0619          | 0563       | M   |     | 202           |
| 182 | 679696            | 679863 | UDP-N-acetylmuramate-L-alanine ligase                                           | murC       | 0623          | 0567       | M   |     | 168           |
| 183 | 681181            | 681488 | hypothetical protein                                                            | -          | 0624          | 0568       | E   |     | 308           |
| 184 | 683542            | 684608 | putative 2,3,4,5-tetrahydropyridine-2-carboxylate N-succinyltransferase         | dapD       | 0626          | 0570       | E   |     | 1067          |
|     |                   |        | hypothetical protein                                                            | -          | 0627/<br>0628 | 0571       | R   |     |               |
| 185 | 685473            | 689879 | hypothetical protein                                                            | -          | 0629          | 0572       | S   |     | 4407          |
|     |                   |        | hypothetical protein                                                            | -          | 0630          | 0573       | R   |     |               |
|     |                   |        | hydrogenase, small subunit                                                      | hyaA       | 0631          | 0574       | C   |     |               |
|     |                   |        | hydrogenase, large subunit                                                      | hyaB       | 0632          | 0575       | C   |     |               |
| 186 | 690347            | 696251 | hydrogenase, large subunit                                                      | hyaB       | 0632          | 0575       | C   |     | 5905          |
|     |                   |        | hydrogenase, cytochrome subunit                                                 | hyaC       | 0633          | 0576       | C   |     |               |
|     |                   |        | hydrogenase expression/formation protein                                        | hyaD       | 0634          | 0577       | C   |     |               |
|     |                   |        | hypothetical protein                                                            | -          | 0635          | 0578       | -   |     |               |
|     |                   |        | hypothetical protein                                                            | -          | 0636          | 0579       | -   |     |               |

| No  | Position in NQ352 |        | Annotation <sup>a</sup>                            |        |                       |              | COG     | OMP      | Import length |
|-----|-------------------|--------|----------------------------------------------------|--------|-----------------------|--------------|---------|----------|---------------|
|     | start             | end    | Description                                        | gene   | HP-number             | jhp-number   |         |          |               |
|     |                   |        | hypothetical protein                               | -      | 0637                  | 0580         | -       |          |               |
|     |                   |        | putative outer membrane protein                    | -      | 0638                  | 0581         | -       | hop      |               |
|     |                   |        | hypothetical protein                               | -      | 0639                  | 0582         | R       |          |               |
| 187 | 697677            | 702328 | polynucleotide adenylyltransferase                 | pcnB   | 0640                  | 0583         | J       |          | 4652          |
|     |                   |        | hypothetical protein                               | -      | 0641                  | 0584         | -       |          |               |
|     |                   |        | putative 3-hydroxyacid dehydrogenase               | -      |                       | 0585         | I       |          |               |
|     |                   |        | NAD(P)H-flavin oxidoreductase                      | -      | 0642                  | 0586         | C       |          |               |
|     |                   |        | glutamylglutaminyl-tRNA synthetase                 | gltX   | 0643                  | 0588         | J       |          |               |
|     |                   |        | hypothetical protein                               | -      | 0644                  | 0589         | -       |          |               |
|     |                   |        | lytic murein transglycosylase                      | -      | 0645                  | 0590         | M       |          |               |
| 188 | 703021            | 703494 | lytic murein transglycosylase                      | -      | 0645                  | 0590         | M       |          | 474           |
|     |                   |        | UTP-glucose-1-phosphate uridylyltransferase        | galU   | 0646                  | 0591         | M       |          |               |
| 189 | 703710            | 703948 | UTP-glucose-1-phosphate uridylyltransferase        | galU   | 0646                  | 0591         | M       |          | 239           |
| 190 | 704791            | 704830 | UDP-N-acetylglucosamine 1-carboxyvinyltransferase  | murA   | 0648                  | 0593         | M       |          | 40            |
| 191 | 705741            | 705751 | UDP-N-acetylglucosamine 1-carboxyvinyltransferase  | murA   | 0648                  | 0593         | M       |          | 11            |
| 192 | 706861            | 707448 | aspartate ammonia-lyase                            | aspA   | 0649                  | 0594         | E       |          | 588           |
|     |                   |        | hypothetical protein                               | -      | 0650                  | 0595         | L       |          |               |
| 193 | 709456            | 709522 | nonheme iron-containing ferritin                   | pfr    | 0653                  | 0598         | P       |          | 67            |
| 194 | 709755            | 709808 | no annotation / intergenic                         |        |                       |              |         |          | 54            |
| 195 | 713541            | 713565 | protective surface antigen D15                     | -      | 0655                  | 0600         | M       | other    | 25            |
| 196 | 713884            | 714598 | hypothetical protein                               | -      | 0656                  | 0601         | HR      |          | 715           |
| 197 | 718155            | 718260 | hypothetical protein                               | -      | 0659                  | 0604         | -       |          | 106           |
| 198 | 719991            | 721024 | ribonuclease HI                                    | rnhA   | 0661                  | 0606         | L       |          | 1034          |
|     |                   |        | ribonuclease III                                   | rnc    | 0662                  | 0607         | K       |          |               |
| 199 | 721250            | 721269 | chorismate synthase                                | aroC   | 0663                  | 0608         | E       |          | 20            |
| 200 | 722271            | 722292 | hypothetical protein                               | -      | 0664                  | 0609         | -       |          | 22            |
| 201 | 723503            | 727019 | coproporphyrinogen III oxidase                     | hemN_1 | 0665                  | 0610         | H       |          | 3517          |
|     |                   |        | glycerol-3-phosphate dehydrogenase                 | glpC   | 0666                  | 0611         | C       |          |               |
|     |                   |        | hypothetical protein                               | -      | 0667/<br>0668         | 0612         | R       |          |               |
|     |                   |        | hypothetical protein                               | -      | 0669                  | 0613         | R       |          |               |
| 202 | 727319            | 727672 | hypothetical protein                               | -      | 0669                  | 0613         | R       |          | 354           |
| 203 | 733577            | 734125 | putative, "similar to jhp0914"                     | -      | -                     | -            | -       |          | 549           |
| 204 | 740675            | 740735 | ribonucleotide-diphosphate reductase subunit alpha | nrdA   | 0680                  | 0621         | F       |          | 61            |
| 205 | 741020            | 741248 | UDP-N-acetylglucosamine pyrophosphorylase          | glmU   | 0683                  | 0624         | M       |          | 229           |
| 206 | 741518            | 742870 | UDP-N-acetylglucosamine pyrophosphorylase          | glmU   | 0683<br>0684/<br>0685 | 0624<br>0625 | M<br>NU |          | 1353          |
|     |                   |        | flagellar biosynthesis protein FliP                | fliP   |                       |              |         |          |               |
| 207 | 744804            | 745371 | iron (III) dicitrate transport protein             | fecA_1 | 0686                  | 0626         | P       | family 4 | 568           |
| 208 | 746103            | 747348 | ferrous iron transport protein B                   | feoB   | 0687                  | 0627         | P       |          | 1246          |
| 209 | 749718            | 749915 | acetyl-coA-acetyltransferase                       | thl    | 0690                  | 0638         | I       |          | 198           |
| 210 | 750741            | 750822 | 3-oxoacid coA-transferase subunit A                | scoA   | 0691                  | 0637         | I       |          | 82            |
| 211 | 763252            | 765930 | DNA gyrase subunit A                               | gyrA   | 0701                  | 0641         | L       |          | 2679          |
|     |                   |        | hypothetical protein                               | -      | 0702                  | 0642         | -       |          |               |

| No  | Position in NQ352 |        | Annotation <sup>a</sup><br>Description                                                   | gene       | HP-number     | jhp-number | COG | OMP | Import length |
|-----|-------------------|--------|------------------------------------------------------------------------------------------|------------|---------------|------------|-----|-----|---------------|
|     | start             | end    |                                                                                          |            |               |            |     |     |               |
|     |                   |        | putative transcriptional regulator                                                       | -          | 0703          | 0643       | T   |     |               |
|     |                   |        | hypothetical protein                                                                     | -          | 0704          | -          | -   |     |               |
|     |                   |        | excinuclease ABC subunit A                                                               | uvrA       | 0705          | 0644       | L   |     |               |
| 212 | 766915            | 772018 | excinuclease ABC subunit A                                                               | uvrA       | 0705          | 0644       | L   | hop | 5104          |
|     |                   |        | outer membrane protein/porin                                                             | hopE       | 0706          | 0645       | -   |     |               |
|     |                   |        | S-adenosyl-methyltransferase MraW                                                        | mraW       | 0707          | 0646       | M   |     |               |
|     |                   |        | hypothetical protein                                                                     | -          | 0708          | 0647       | -   |     |               |
|     |                   |        | hypothetical protein                                                                     | -          | 0709          | 0648       | S   |     |               |
| 213 | 776532            | 776586 | ABC transporter ATP-binding protein                                                      | -          | 0715          | 0653       | R   |     | 55            |
| 214 | 795129            | 795285 | hypothetical protein                                                                     | -          | 0734          | 0671       | J   |     | 157           |
| 215 | 800155            | 800157 | D-alanyl-D-alanine-adding enzyme                                                         | murF       | 0740          | 0677       | M   |     | 3             |
| 216 | 800554            | 800555 | D-alanyl-D-alanine-adding enzyme                                                         | murF       | 0740          | 0677       | M   |     | 2             |
| 217 | 808062            | 808075 | tRNA (guanine-N(7))-methyltransferase                                                    | trmB       | 0747          | 0684       | R   |     | 14            |
| 218 | 813411            | 813413 | flagellar capping protein                                                                | fliD       | 0752          | 0689       | N   |     | 3             |
| 219 | 817999            | 818311 | hypothetical protein                                                                     | -          | 0759          | 0696       | V   |     | 313           |
| 220 | 832244            | 832832 | tyrosyl-tRNA synthetase                                                                  | tyrS       | 0774          | 0711       | J   |     | 589           |
| 221 | 835981            | 836094 | uridylylate kinase                                                                       | pyrH       | 0777          | 0714       | F   |     | 114           |
| 222 | 836821            | 837185 | hypothetical protein                                                                     | -          | 0778          | 0715       | R   |     | 365           |
| 223 | 837429            | 837544 | bifunctional aconitate hydratase 2/2-methylisocitrate dehydratase                        | acnB       | 0779          | 0716       | C   |     | 116           |
| 224 | 838209            | 839125 | bifunctional aconitate hydratase 2/2-methylisocitrate dehydratase                        | acnB       | 0779          | 0716       | C   |     | 917           |
| 225 | 839890            | 841175 | bifunctional aconitate hydratase 2/2-methylisocitrate dehydratase                        | acnB       | 0779          | 0716       | C   |     | 1286          |
|     |                   |        | hypothetical protein                                                                     | -          | 0780          | 0717       | -   |     |               |
|     |                   |        | hypothetical protein                                                                     | HPAG1_0766 |               |            | -   |     |               |
|     |                   |        | hypothetical protein                                                                     | -          | 0781          | 0718       | L   |     |               |
| 226 | 849156            | 849164 | putative outer membrane protein                                                          | -          | 0788          | 0725       | -   | hof | 9             |
| 227 | 854551            | 855196 | putative heavy-metal cation-transporting P-type ATPase                                   | hmcT       | 0791          | 0727       | P   |     | 646           |
|     |                   |        | hypothetical protein                                                                     | -          | 0792          | 0728       | O   |     |               |
| 228 | 855553            | 857603 | hypothetical protein                                                                     | -          | 0792          | 0728       | O   |     | 2051          |
|     |                   |        | peptide deformylase                                                                      | def        | 0793          | 0729       | J   |     |               |
|     |                   |        | ATP-dependent Clp protease proteolytic subunit                                           | clpP       | 0794          | 0730       | OU  |     |               |
| 229 | 863090            | 863109 | GTP cyclohydrolase II                                                                    | ribA       | 0802          | 0738       | H   |     | 20            |
| 230 | 864621            | 864954 | bifunctional 3,4-dihydroxy-2-butanone 4-phosphate synthase/GTP cyclohydrolase II protein | ribBA      | 0804          | 0740       | H   |     | 334           |
| 231 | 874313            | 874412 | molybdopterin-synthase sulfurylase                                                       | moeB       | 0814          | 0750       | H   |     | 100           |
|     |                   |        | flagellar motor protein MotA                                                             | motA       | 0815          | 0751       | N   |     |               |
| 232 | 899033            | 899276 | bifunctional phosphopantothenoylcysteine decarboxylase/ phosphopantothenate synthase     | dfp        | 0841          | 0779       | H   |     | 244           |
| 233 | 905767            | 906276 | type I restriction enzyme (restriction subunit)                                          | hsdR_2     | 0846          | 0784       | V   |     | 510           |
|     |                   |        | type I restrictionenzyme (specifity subunit)                                             | hsdS_2     | 0848/<br>0849 | 0785       | V   |     |               |
| 234 | 909604            | 910988 | hypothetical protein                                                                     | -          | 0851          | 0787       | I   |     | 1385          |
|     |                   |        | hypothetical protein                                                                     | -          | 0852          | 0788       | S   |     |               |
|     |                   |        | ABC transporter ATP-binding protein                                                      | -          | 0853          | 0789       | R   |     |               |

| No  | Position in NQ352 |        | Annotation <sup>a</sup><br>Description                    | gene | HP-<br>number | jhp-<br>number | COG | OMP | Import<br>length |
|-----|-------------------|--------|-----------------------------------------------------------|------|---------------|----------------|-----|-----|------------------|
|     | start             | end    |                                                           |      |               |                |     |     |                  |
| 235 | 912230            | 912728 | ABC transporter ATP-binding protein                       | -    | 0853          | 0789           | R   |     | 499              |
| 236 | 914608            | 914611 | putative ADP-D-glycero-D-mannoheptose synthase            | waaE | 0858          | 0792           | M   |     | 4                |
| 237 | 916051            | 919553 | ADP-L-glycero-D-mannoheptose-6-epimerase                  | gmhD | 0859          | 0793           | MG  |     | 3503             |
|     |                   |        | hypothetical protein                                      | -    | 0860          | 0794           | E   |     |                  |
|     |                   |        | hypothetical protein                                      | -    | 0861          | 0795           | S   |     |                  |
|     |                   |        | pantothenate kinase                                       | -    | 0862          | 0796           | K   |     |                  |
|     |                   |        | hypothetical protein                                      | -    | 0863          | 0797           | -   |     |                  |
| 238 | 922799            | 924044 | lipid-A-disaccharide synthase                             | lpxB | 0867          | 0801           | M   |     | 1246             |
|     |                   |        | hypothetical protein                                      | -    | 0868          | 0802           | -   |     |                  |
|     |                   |        | hydrogenase nickel incorporation protein                  | hypA | 0869          | 0803           | R   |     |                  |
|     |                   |        | flagellar hook protein FlgE                               | flgE | 0870          | 0804           | N   |     |                  |
| 239 | 924521            | 924647 | flagellar hook protein FlgE                               | flgE | 0870          | 0804           | N   |     | 127              |
| 240 | 936697            | 941666 | holliday junction DNA helicase RuvA                       | ruvA | 0883          | 0815           | L   |     | 4970             |
|     |                   |        | hypothetical protein                                      | -    | 0884          | 0816           | -   |     |                  |
|     |                   |        | hypothetical protein                                      | -    | 0885          | 0817           | R   |     |                  |
|     |                   |        | cysteinyl-tRNA synthetase                                 | cysS | 0886          | 0818           | J   |     |                  |
| 241 | 942627            | 942651 | vacuolating cytotoxin                                     | vacA | 0887          | 0819           | -   |     | 25               |
| 242 | 943900            | 945057 | vacuolating cytotoxin                                     | vacA | 0887          | 0819           | -   |     | 1158             |
| 243 | 946923            | 948696 | putative lipopolysaccharide biosynthesis protein          | -    |               | 0820           | M   |     | 1774             |
|     |                   |        | iron (III) dicitrate transport system ATP-binding protein | fecE | 0888          | 0821           | PH  |     |                  |
|     |                   |        | iron (III) dicitrate transport system permease protein    | fecD | 0889          | 0822           | P   |     |                  |
| 244 | 952101            | 953177 | outer membrane protein - adhesin                          | babA | 1243          | 0833           | -   | hop | 1077             |
| 245 | 953394            | 953434 | outer membrane protein - adhesin                          | babA | 1243          | 0833           | -   | hop | 41               |
| 246 | 953717            | 953792 | outer membrane protein - adhesin                          | babA | 1243          | 0833           | -   | hop | 76               |
| 247 | 954466            | 954593 | no annotation / intergenic                                |      |               |                |     |     | 128              |
| 248 | 955257            | 957031 | hypothetical protein                                      | -    |               | 0834           | O   |     | 1775             |
|     |                   |        | hydrogenase expression/formation protein                  | hypD | 0898          | 0835           | O   |     |                  |
|     |                   |        | hydrogenase expression/formation protein                  | hypC | 0899          | 0836           | O   |     |                  |
|     |                   |        | hydrogenase expression/formation protein                  | hypB | 0900          | 0837           | OK  |     |                  |
| 249 | 958269            | 959802 | acetate kinase                                            | ackA | 0903          | 0840           | C   |     | 1534             |
|     |                   |        | phosphotransacetylase                                     | pta  | 0904/<br>0905 | 0841           | C   |     |                  |
| 250 | 963460            | 965937 | flagellar basal body rod modification protein             | flgD | 0907          | 0843           | N   |     | 2478             |
|     |                   |        | flagellar hook protein FlgE                               | flgE | 0908          | 0844           | N   |     |                  |
|     |                   |        | hypothetical protein                                      | -    | 0909          | 0845           | -   |     |                  |
| 251 | 966424            | 967371 | type II DNA modification enzyme (methyltransferase)       | -    | 0910          | 0846           | L   |     | 948              |
|     |                   |        | putative ATP-dependent helicase                           | -    | 0911          | 0847           | L   |     |                  |
| 252 | 967851            | 968433 | putative ATP-dependent helicase                           | -    | 0911          | 0847           | L   |     | 583              |
| 253 | 970250            | 970454 | outer membrane protein/porin                              | hopC | 0912          | 0848           | -   | hop | 205              |
| 254 | 970884            | 970996 | outer membrane protein/porin                              | hopC | 0912          | 0848           | -   | hop | 113              |
| 255 | 971499            | 971796 | outer membrane protein/porin                              | hopC | 0912          | 0848           | -   | hop | 298              |
| 256 | 972555            | 972891 | outer membrane protein/porin                              | hopB | 0913          | 0849           | -   | hop | 337              |
| 257 | 973113            | 974779 | outer membrane protein/porin                              | hopB | 0913          | 0849           | -   | hop | 1667             |



| No  | Position in NQ352 |         | Annotation <sup>a</sup>                        |        | gene          | HP-number | jhp-number | COG      | OMP  | Import length |
|-----|-------------------|---------|------------------------------------------------|--------|---------------|-----------|------------|----------|------|---------------|
|     | start             | end     | Description                                    |        |               |           |            |          |      |               |
|     |                   |         | putative outer membrane protein                | -      | 0914          | 0850      | -          | hof      |      |               |
| 258 | 977575            | 977726  | putative iron-regulated outer membrane protein | frpB_2 | 0915/<br>0916 | 0851      | P          | family 4 | 152  |               |
| 259 | 978893            | 979135  | hypothetical protein                           | -      | 0918          | 0852      | J          |          | 243  |               |
|     |                   |         | carbamoyl-phosphate synthase large subunit     | carB   | 0919          | 0853      | EF         |          |      |               |
| 260 | 985405            | 989484  | putative vacuolating cytotoxin (VacA) paralog  | -      | 0922          | 0856      | N          |          | 4080 |               |
| 261 | 991367            | 991441  | putative vacuolating cytotoxin (VacA) paralog  | -      | 0922          | 0856      | N          |          | 75   |               |
| 262 | 992299            | 992313  | recombination protein RecR                     | recR   | 0925          | 0859      | L          |          | 15   |               |
| 263 | 994617            | 994801  | heat shock protein HtpX                        | htpX   | 0927          | 0861      | O          |          | 185  |               |
|     |                   |         | GTP cyclohydrolase I                           | folE   | 0928          | 0863      | H          |          |      |               |
| 264 | 995847            | 995985  | geranyltranstransferase                        | ispA   | 0929          | 0864      | H          |          | 139  |               |
| 265 | 998744            | 999571  | hypothetical protein                           | -      | 0934          | 0868      | O          |          | 828  |               |
|     |                   |         | hypothetical protein                           | -      | 0935          | 0869      | R          |          |      |               |
| 266 | 1002962           | 1003540 | proline/betaine transporter                    | proP   | 0936          | 0871      | -          |          | 579  |               |
| 267 | 1003743           | 1004543 | hypothetical protein                           | -      | 0937          | 0872      | -          |          | 801  |               |
| 268 | 1010772           | 1010971 | D-amino acid dehydrogenase                     | dadA   | 0943          | 0878      | E          |          | 200  |               |
|     |                   |         | hypothetical protein                           | -      | 0944          | 0879      | J          |          |      |               |
| 269 | 1011238           | 1011283 | hypothetical protein                           | -      | 0944          | 0879      | J          |          | 46   |               |
| 270 | 1014453           | 1015558 | hypothetical protein                           | -      | 0948          | 0882      | -          |          | 1106 |               |
| 271 | 1017194           | 1018660 | putative recombination protein RecO            | -      | 0951          | 0885      | -          |          | 1467 |               |
|     |                   |         | hypothetical protein                           | -      | 0952          | 0886      | R          |          |      |               |
|     |                   |         | hypothetical protein                           | -      | 0953          | 0887      | -          |          |      |               |
| 272 | 1020422           | 1021594 | prolipoprotein diacylglyceryl transferase      | lgt    | 0955          | 0889      | M          |          | 1173 |               |
|     |                   |         | hypothetical protein                           | -      | 0956          | 0890      | J          |          |      |               |
|     |                   |         | 3-deoxy-D-manno-octulosonic-acid transferase   | waaA   | 0957          | 0891      | M          |          |      |               |
| 273 | 1060686           | 1061010 | hypothetical protein                           | -      |               | 0949      | U          |          | 325  |               |
|     |                   |         | hypothetical protein                           | -      |               | 0950      | -          |          |      |               |
| 274 | 1062754           | 1062833 | integrase/recombinase (XERCD family)           | -      |               | 0951      | L          |          | 80   |               |
| 275 | 1066577           | 1067881 | arginine decarboxylase                         | speA   | 0422          | 0962      | E          |          | 1305 |               |
| 276 | 1070545           | 1070620 | hypothetical protein                           | -      | 0419          | 0965      | -          |          | 76   |               |
| 277 | 1070857           | 1071928 | hypothetical protein                           | -      | 0419          | 0965      | -          |          | 1072 |               |
|     |                   |         | hypothetical protein                           | -      | 0418          | 0966      | -          |          |      |               |
|     |                   |         | methionine-tRNA synthetase                     | metG   | 0417          | 0967      | J          |          |      |               |
| 278 | 1073408           | 1073487 | methionine-tRNA synthetase                     | metG   | 0417          | 0967      | J          |          | 80   |               |
| 279 | 1074410           | 1074910 | cyclopocyclopropane fatty acid synthase        | cfa    | 0416          | 0968      | M          |          | 501  |               |
| 280 | 1075501           | 1076656 | hypothetical protein                           | -      | 0415          | 0969      | M          |          | 1156 |               |
| 281 | 1077408           | 1077702 | hypothetical protein                           | -      | 0412          | 0970      | -          |          | 295  |               |
| 282 | 1077963           | 1078006 | no annotation / intergenic                     |        |               |           |            |          | 44   |               |
| 283 | 1078273           | 1079007 | hypothetical protein                           | -      | 0411          |           | -          |          | 735  |               |
|     |                   |         | putative paralogue of HpaA                     | -      | 0410          | 0971      | -          |          |      |               |
| 284 | 1079466           | 1080397 | GMP synthase                                   | guaA   | 0409          | 0972      | F          |          | 932  |               |
| 285 | 1080926           | 1081014 | hypothetical protein                           | -      | 0408          | 0973      | -          |          | 89   |               |
| 286 | 1084351           | 1084366 | hypothetical protein                           | -      | 0406          | 0975      | -          |          | 16   |               |
| 287 | 1087588           | 1087623 | phenylalanyl-tRNA synthetase subunit beta      | pheT   | 0402          | 0979      | J          |          | 36   |               |
| 288 | 1088184           | 1088211 | phenylalanyl-tRNA synthetase subunit beta      | pheT   | 0402          | 0979      | J          |          | 28   |               |
| 289 | 1089468           | 1091103 | phenylalanyl-tRNA synthetase subunit beta      | pheT   | 0402          | 0979      | J          |          | 1636 |               |

| No  | Position in NQ352 |         | Annotation <sup>a</sup><br>Description                       | gene   | HP-<br>number | jhp-<br>number | COG | OMP | Import<br>length |
|-----|-------------------|---------|--------------------------------------------------------------|--------|---------------|----------------|-----|-----|------------------|
|     | start             | end     |                                                              |        |               |                |     |     |                  |
|     |                   |         | 3-phosphoshikimate 1-carboxyvinyltransferase                 | aroA   | 0401          | 0980           | E   |     |                  |
|     |                   |         | 4-hydroxy-3-methylbut-2-enyl diphosphate reductase           | ispH   | 0400          | 0981           | IM  |     |                  |
| 290 | 1092076           | 1092184 | 30S ribosomal protein S1                                     | rpsA   | 0399          | 0982           | J   |     | 109              |
| 291 | 1092502           | 1092784 | 30S ribosomal protein S1                                     | rpsA   | 0399          | 0982           | J   |     | 283              |
| 292 | 1095098           | 1095233 | D-3-phosphoglycerate dehydrogenase                           | serA   | 0397          | 0984           | HE  |     | 136              |
| 293 | 1096652           | 1097225 | hypothetical protein                                         | -      | 0396          | 0985           | H   |     | 574              |
| 294 | 1098838           | 1099479 | hypothetical protein                                         | -      | 0394          | 0987           | S   |     | 642              |
|     |                   |         | putative chemotaxis protein                                  | cheV_3 | 0393          | 0988           | NT  |     |                  |
| 295 | 1100234           | 1102217 | histidine kinase                                             | cheA   | 0392          | 0989           | NT  |     | 1984             |
| 296 | 1102453           | 1103993 | histidine kinase - MCP coupling protein                      | cheW   | 0391          | 0990           | NT  |     | 1541             |
|     |                   |         | thiol peroxidase                                             | tpx    | 0390          | 0991           | O   |     |                  |
|     |                   |         | iron-dependent superoxide dismutase                          | sodF   | 0389          | 0992           | P   |     |                  |
| 297 | 1104232           | 1106127 | iron-dependent superoxide dismutase                          | sodF   | 0389          | 0992           | P   |     | 1896             |
|     |                   |         | hypothetical protein                                         | -      | 0388          | 0993           | H   |     |                  |
|     |                   |         | primosome assembly protein PriA                              | priA   | 0387          | 0994           | L   |     |                  |
| 298 | 1106507           | 1108214 | primosome assembly protein PriA                              | priA   | 0387          | 0994           | L   |     | 1708             |
|     |                   |         | hypothetical protein                                         | -      | 0386          | 0995           | -   |     |                  |
|     |                   |         | hypothetical protein                                         | -      | 0385          | 0996           | -   |     |                  |
|     |                   |         | hypothetical protein                                         | -      | 0384          | 0997           | -   |     |                  |
| 299 | 1111534           | 1113187 | protoporphyrinogen oxidase                                   | hemG   | 0381          | 1000           | J   |     | 1654             |
|     |                   |         | glutamate dehydrogenase                                      | gdhA   | 0380          | 1001           | E   |     |                  |
|     |                   |         | alpha-(1,3)-fucosyltransferase                               | fucU   | 0379          | 1002           | -   |     |                  |
| 300 | 1113253           | 1113287 | alpha-(1,3)-fucosyltransferase                               | fucU   | 0379          | 1002           | -   |     | 35               |
| 301 | 1113523           | 1114226 | putative cytochrome C-type biogenesis protein                | -      | 0378          | 1003           | O   |     | 704              |
| 302 | 1114714           | 1115283 | putative cytochrome C-type biogenesis protein                | -      | 0378          | 1003           | O   |     | 570              |
| 303 | 1115847           | 1116351 | putative cytochrome C-type biogenesis protein                | -      | 0378          | 1003           | O   |     | 505              |
|     |                   |         | hypothetical protein                                         | -      | 0377          | 1004           | O   |     |                  |
| 304 | 1118119           | 1118120 | hypothetical protein                                         | -      | 0375          | 1006           | -   |     | 2                |
| 305 | 1119408           | 1120243 | putative outer membrane protein                              | -      | 0373          | 1008           | -   | hom | 836              |
| 306 | 1120557           | 1122747 | putative outer membrane protein                              | -      | 0373          | 1008           | -   | hom | 2191             |
|     |                   |         | deoxycytidine triphosphate deaminase                         | dcd    | 0372          | 1009           | F   |     |                  |
|     |                   |         | biotin carboxyl carrier protein                              | accB   | 0371          | 1010           | I   |     |                  |
|     |                   |         | biotin carboxylase                                           | accC   | 0370          | 1011           | I   |     |                  |
| 307 | 1124961           | 1128451 | putative type II DNA modification enzyme (methyltransferase) | -      | 0369          | 1012           | -   |     | 3491             |
|     |                   |         | hypothetical protein                                         | -      | 0368          | 1013           | -   |     |                  |
|     |                   |         | hypothetical protein                                         | -      | 0367          | 1014           | -   |     |                  |
|     |                   |         | spore coat polysaccharide biosynthesis protein C             | -      | 0366          | 1015           | M   |     |                  |
|     |                   |         | hypothetical protein                                         | -      | 0365          |                | -   |     |                  |
| 308 | 1129548           | 1130590 | ribonucleotide-diphosphate reductase subunit beta            | nrdF   | 0364          | 1016           | F   |     | 1043             |
|     |                   |         | protein-L-isoaspartate O-methyltransferase                   | pcm    | 0363          | 1017           | O   |     |                  |
|     |                   |         | hypothetical protein                                         | -      | 0362          | 1018           | R   |     |                  |
| 309 | 1152255           | 1152913 | adenylosuccinate lyase                                       | purB   | 1112          | 1039           | F   |     | 659              |

| No  | Position in NQ352 |         | Annotation <sup>a</sup><br>Description                                                                                                                                                | gene                   | HP-<br>number                        | jhp-<br>number                       | COG                    | OMP         | Import<br>length |
|-----|-------------------|---------|---------------------------------------------------------------------------------------------------------------------------------------------------------------------------------------|------------------------|--------------------------------------|--------------------------------------|------------------------|-------------|------------------|
|     | start             | end     |                                                                                                                                                                                       |                        |                                      |                                      |                        |             |                  |
|     |                   |         | putative outer membrane protein                                                                                                                                                       | -                      | 1113                                 | 1040                                 | -                      | hor         |                  |
| 310 | 1153306           | 1153309 | putative outer membrane protein                                                                                                                                                       | -                      | 1113                                 | 1040                                 | -                      | hor         | 4                |
| 311 | 1153542           | 1155458 | excinuclease ABC subunit B                                                                                                                                                            | uvrB                   | 1114                                 | 1041                                 | L                      |             | 1917             |
| 312 | 1165776           | 1165781 | type II DNA modification enzyme<br>(methyltransferase)                                                                                                                                | -                      | 1121                                 | 1050                                 | L                      |             | 6                |
| 313 | 1173515           | 1174168 | F0F1 ATP synthase subunit beta<br>F0F1 ATP synthase subunit gamma                                                                                                                     | atpD<br>atpG           | 1132<br>1133                         | 1060<br>1061                         | C<br>C                 |             | 654              |
| 314 | 1175397           | 1175961 | F0F1 ATP synthase subunit alpha                                                                                                                                                       | atpA                   | 1134                                 | 1062                                 | C                      |             | 565              |
| 315 | 1176400           | 1176530 | F0F1 ATP synthase subunit delta                                                                                                                                                       | atpH                   | 1135                                 | 1063                                 | C                      |             | 131              |
| 316 | 1180406           | 1181083 | methionyl-tRNA formyltransferase                                                                                                                                                      | fmt                    | 1141                                 | 1069                                 | J                      |             | 678              |
| 317 | 1181744           | 1184501 | ATPase, HPP12_1108<br>hypothetical protein                                                                                                                                            | -<br>-                 | <br>1143                             | <br>1071                             | PH<br>S                |             | 2758             |
| 318 | 1201754           | 1201882 | putative outer membrane protein                                                                                                                                                       | -                      | 1157                                 | 1084                                 | -                      | hop         | 129              |
| 319 | 1202818           | 1202831 | putative outer membrane protein                                                                                                                                                       | -                      | 1157                                 | 1084                                 | -                      | hop         | 14               |
| 320 | 1206831           | 1206920 | hypothetical protein                                                                                                                                                                  | -                      | 1162                                 | 1089                                 | S                      |             | 90               |
| 321 | 1213235           | 1214027 | hypothetical protein                                                                                                                                                                  | -                      | 1168                                 | 1095                                 | T                      |             | 793              |
| 322 | 1214836           | 1218177 | hypothetical protein<br>amino acid ABC transporter permease<br>amino acid ABC transporter permease<br>amino acid ABC transporter ATP-binding<br>protein<br>amino acid ABC transporter | -<br>-<br>-<br>-<br>-  | 1168<br>1169<br>1170<br>1171<br>1172 | 1095<br>1096<br>1097<br>1098<br>1099 | T<br>E<br>E<br>E<br>ET |             | 3342             |
| 323 | 1218694           | 1219204 | hypothetical protein                                                                                                                                                                  | -                      | 1173                                 | 1100                                 | -                      |             | 511              |
| 324 | 1219841           | 1222739 | glucose/galactose transporter<br>hypothetical protein<br>putative outer membrane function                                                                                             | gluP<br>-<br>-         | 1174<br>1175<br>1177                 | 1101<br>1102<br>1103                 | G<br>R<br>-            | <br><br>hop | 2899             |
| 325 | 1223060           | 1223250 | putative outer membrane function                                                                                                                                                      | -                      | 1177                                 | 1103                                 | -                      | hop         | 191              |
| 326 | 1224452           | 1225024 | hypothetical protein<br>purine nucleoside phosphorylase                                                                                                                               | HPAG1_<br>1116<br>deoD | <br><br>1178                         | <br><br>1104                         | -<br><br>F             |             | 573              |
| 327 | 1225426           | 1225583 | purine nucleoside phosphorylase<br>phosphopentomutase                                                                                                                                 | deoD<br>deoB           | 1178<br>1179                         | 1104<br>1105                         | F<br>G                 |             | 158              |
| 328 | 1225908           | 1225965 | phosphopentomutase                                                                                                                                                                    | deoB                   | 1179                                 | 1105                                 | G                      |             | 58               |
| 329 | 1226627           | 1226693 | phosphopentomutase                                                                                                                                                                    | deoB                   | 1179                                 | 1105                                 | G                      |             | 67               |
| 330 | 1232892           | 1233172 | hypothetical protein<br>sugar efflux transporter                                                                                                                                      | -<br>-                 | 1184<br>1185                         | 1110<br>1111                         | V<br>G                 |             | 281              |
| 331 | 1236944           | 1237605 | aspartate-semialdehyde dehydrogenase                                                                                                                                                  | asd                    | 1189                                 | 1114                                 | E                      |             | 662              |
| 332 | 1237875           | 1238518 | aspartate-semialdehyde dehydrogenase<br>histidyl-tRNA synthetase                                                                                                                      | asd<br>hisS            | 1189<br>1190                         | 1114<br>1115                         | E<br>J                 |             | 644              |
| 333 | 1238773           | 1241697 | histidyl-tRNA synthetase<br>ADP-heptose-LPS heptosyltransferase II<br>putative motility protein<br>aldo-keto reductase, putative                                                      | hisS<br>waaF<br>-<br>- | 1190<br>1191<br>1192<br>1193         | 1115<br>1116<br>1117                 | J<br>M<br>-<br>C       |             | 2925             |
| 334 | 1241902           | 1241955 | aldo-keto reductase, putative                                                                                                                                                         | -                      | 1193                                 |                                      | C                      |             | 54               |
| 335 | 1242715           | 1243966 | elongation factor G                                                                                                                                                                   | fusA                   | 1195                                 | 1118                                 | J                      |             | 1252             |
| 336 | 1246495           | 1247434 | DNA-directed RNA polymerase subunit<br>beta/beta'                                                                                                                                     | rpoB                   | 1198                                 | 1121                                 | K                      |             | 940              |
| 337 | 1250773           | 1250962 | DNA-directed RNA polymerase subunit<br>beta/beta'                                                                                                                                     | rpoB                   | 1198                                 | 1121                                 | K                      |             | 190              |

| No                           | Position in NQ352 |         | Annotation <sup>a</sup><br>Description                                                 | gene   | HP-<br>number | jhp-<br>number | COG | OMP | Import<br>length |
|------------------------------|-------------------|---------|----------------------------------------------------------------------------------------|--------|---------------|----------------|-----|-----|------------------|
|                              | start             | end     |                                                                                        |        |               |                |     |     |                  |
| 338                          | 1251682           | 1252936 | DNA-directed RNA polymerase subunit beta/beta'                                         | rpoB   | 1198          | 1121           | K   |     | 1255             |
| 339                          | 1256874           | 1257566 | 50S ribosomal protein L11                                                              | rplK   | 1202          | 1125           | J   |     | 693              |
|                              |                   |         | transcription antitermination protein NusG                                             | nusG   | 1203          | 1126           | K   |     |                  |
|                              |                   |         | preprotein translocase subunit SecE                                                    | secE   | 1203          | 1126a          | -   |     |                  |
| 340                          | 1257809           | 1258301 | 50S ribosomal protein L33                                                              | rpmG   | 1204          | 1127           | J   |     | 493              |
|                              |                   |         | elongation factor Tu                                                                   | tuf    | 1205          | 1128           | J   |     |                  |
| 341                          | 1272475           | 1272732 | glycinamide ribonucleotide synthetase                                                  | purD   | 1218          | 1140           | F   |     | 258              |
| 342                          | 1273152           | 1273353 | hypothetical protein                                                                   | -      | 1219          |                | -   |     | 202              |
|                              |                   |         | putative ABC transporter, ATP-binding protein                                          | -      | 1220          | 1141           | V   |     |                  |
| 343                          | 1279761           | 1280570 | coproporphyrinogen III oxidase                                                         | hemN_2 | 1226          | 1147           | H   |     | 810              |
|                              |                   |         | periplasmic cytochrome C-553                                                           | -      | 1227          | 1148           | C   |     |                  |
| 344                          | 1281795           | 1281909 | aspartate kinase                                                                       | lysC   | 1229          | 1150           | E   |     | 115              |
| 345                          | 1284894           | 1285397 | hypothetical protein                                                                   | -      | 1233          | 1154           | -   |     | 504              |
| 346                          | 1287585           | 1288045 | hypothetical protein                                                                   | -      | 1235          | 1156           | -   |     | 461              |
|                              |                   |         | hypothetical protein                                                                   | -      | 1236          | 1157           | S   |     |                  |
| 347                          | 1290817           | 1291848 | hypothetical protein                                                                   | -      | 1239          |                | -   |     | 1032             |
|                              |                   |         | hypothetical protein                                                                   | -      |               | 1160           | -   |     |                  |
|                              |                   |         | Maf-like protein                                                                       | maf    | 1240          | 1161           | D   |     |                  |
| 348                          | 1293248           | 1293401 | alanyl-tRNA synthetase                                                                 | alaS   | 1241          | 1162           | J   |     | 154              |
| 349                          | 1294648           | 1295102 | alanyl-tRNA synthetase                                                                 | alaS   | 1241          | 1162           | J   |     | 455              |
|                              |                   |         | hypothetical protein                                                                   | -      | 1242          | 1163           | S   |     |                  |
| 350                          | 1295730           | 1297432 | outer membrane protein - adhesin                                                       | babB   | 0896          | 1164           | -   | hop | 1703             |
| 351                          | 1300432           | 1300433 | ribonuclease II family protein                                                         | vacB   | 1248          | 1169           | K   |     | 2                |
| 352                          | 1308505           | 1312772 | preprotein translocase subunit SecG                                                    | secG   | 1255          | 1176           | U   |     | 4268             |
|                              |                   |         | ribosome recycling factor                                                              | frf    | 1256          | 1177           | J   |     |                  |
|                              |                   |         | orotate phosphoribosyltransferase                                                      | pyrE   | 1257          | 1178           | F   |     |                  |
|                              |                   |         | hypothetical protein                                                                   | -      | 1258          | 1179           | -   |     |                  |
|                              |                   |         | hypothetical protein                                                                   | -      | 1259          | 1180           | K   |     |                  |
|                              |                   |         | NADH dehydrogenase subunit A                                                           | nuoA   | 1260          | 1181           | C   |     |                  |
|                              |                   |         | NADH dehydrogenase subunit B                                                           | nuoB   | 1261          | 1182           | C   |     |                  |
| NADH dehydrogenase subunit C | nuoC              | 1262    | 1183                                                                                   | C      |               |                |     |     |                  |
| 353                          | 1313205           | 1313751 | NADH dehydrogenase subunit D                                                           | nuoD   | 1263          | 1184           | C   |     | 547              |
| 354                          | 1314204           | 1315722 | NADH dehydrogenase subunit D                                                           | nuoD   | 1263          | 1184           | C   |     | 1519             |
|                              |                   |         | putative NADH oxidoreductase I                                                         | nuoE   | 1264          | 1185           | -   |     |                  |
|                              |                   |         | putative NADH oxidoreductase I                                                         | nuoF   | 1265          | 1186           | -   |     |                  |
|                              |                   |         | NADH dehydrogenase subunit G                                                           | nuoG   | 1266          | 1187           | C   |     |                  |
| 355                          | 1316818           | 1316868 | NADH dehydrogenase subunit G                                                           | nuoG   | 1266          | 1187           | C   |     | 51               |
| 356                          | 1318466           | 1321283 | NADH dehydrogenase subunit H                                                           | nuoH   | 1267          | 1188           | C   |     | 2818             |
|                              |                   |         | NADH dehydrogenase subunit I                                                           | nuoI   | 1268          | 1189           | C   |     |                  |
|                              |                   |         | NADH dehydrogenase subunit J                                                           | nuoJ   | 1269          | 1190           | C   |     |                  |
|                              |                   |         | NADH dehydrogenase subunit K                                                           | nuoK   | 1270          | 1191           | C   |     |                  |
|                              |                   |         | NADH dehydrogenase subunit L                                                           | nuoL   | 1271          | 1192           | CP  |     |                  |
| 357                          | 1331924           | 1333136 | tryptophan synthase subunit beta                                                       | trpB   | 1278          | 1199           | E   |     | 1213             |
|                              |                   |         | bifunctional indole-3-glycerol phosphate synthase/phosphoribosylanthranilate isomerase | trpC   | 1279          | 1200           | E   |     |                  |

| No  | Position in NQ352 |         | Annotation <sup>a</sup><br>Description              | gene   | HP-<br>number | jhp-<br>number | COG | OMP      | Import<br>length |
|-----|-------------------|---------|-----------------------------------------------------|--------|---------------|----------------|-----|----------|------------------|
|     | start             | end     |                                                     |        |               |                |     |          |                  |
| 358 | 1333801           | 1333836 | anthranilate phosphoribosyltransferase              | trpD   | 1280          | 1201           | E   |          | 36               |
| 359 | 1334352           | 1334953 | anthranilate synthase component II                  | trpG   | 1281          | 1202           | EH  |          | 602              |
|     |                   |         | anthranilate synthase component I                   | trpE   | 1282          | 1203           | EH  |          |                  |
| 360 | 1335272           | 1335668 | anthranilate synthase component I                   | trpE   | 1282          | 1203           | EH  |          | 397              |
| 361 | 1339139           | 1339788 | hypothetical protein                                | -      | 1286          | 1206           | S   |          | 650              |
|     |                   |         | putative transcriptional regulator                  | -      | 1287          | 1207           | K   |          |                  |
| 362 | 1340596           | 1341163 | nicotinamide mononucleotide transporter             | pnuC   | 1290          | 1210           | H   |          | 568              |
| 363 | 1350302           | 1352465 | 30S ribosomal protein S14                           | rpsN   | 1306          | 1226           | J   |          | 2164             |
|     |                   |         | 50S ribosomal protein L5                            | rplE   | 1307          | 1227           | J   |          |                  |
|     |                   |         | 50S ribosomal protein L24                           | rplX   | 1308          | 1228           | J   |          |                  |
|     |                   |         | 50S ribosomal protein L14                           | rplN   | 1309          | 1229           | J   |          |                  |
|     |                   |         | 30S ribosomal protein S17                           | rpsQ   | 1310          | 1230           | J   |          |                  |
|     |                   |         | 50S ribosomal protein L29                           | rpmC   | 1311          | 1231           | -   |          |                  |
|     |                   |         | 50S ribosomal protein L16                           | rplP   | 1312          | 1232           | J   |          |                  |
| 364 | 1352698           | 1353220 | 30S ribosomal protein S3                            | rpsC   | 1313          | 1233           | J   |          | 523              |
| 365 | 1353433           | 1353554 | 50S ribosomal protein L22                           | rplV   | 1314          | 1234           | J   |          | 122              |
| 366 | 1358149           | 1358578 | hypothetical protein                                | -      | 1322          | 1242           | -   |          | 430              |
| 367 | 1358803           | 1358804 | ribonuclease HII                                    | rnhB   | 1323          | 1243           | L   |          | 2                |
| 368 | 1362051           | 1366180 | fumarate hydratase                                  | fumC   | 1325          | 1245           | C   |          | 4130             |
|     |                   |         | hypothetical protein                                | -      | 1326          | 1246           | -   |          |                  |
|     |                   |         | hypothetical protein                                | -      | 1327          | 1247           | MU  | family 5 |                  |
|     |                   |         | cation efflux system protein                        | czcB_2 | 1328          | 1248           | M   |          |                  |
| 369 | 1366428           | 1366752 | cation efflux system protein                        | czcA_2 | 1329          | 1249           | P   |          | 325              |
| 370 | 1371765           | 1371767 | hypothetical protein                                | -      | 1333          | 1253           | -   |          | 3                |
| 371 | 1377802           | 1377811 | no annotation / intergenic                          |        |               |                |     |          | 10               |
| 372 | 1378284           | 1378886 | hypothetical protein                                | -      | 1343          | 1262           | P   |          | 603              |
|     |                   |         | magnesium/ cobalt transporter CorA                  | corA   | 1344          | 1263           | P   |          |                  |
| 373 | 1379483           | 1381284 | magnesium/ cobalt transporter CorA                  | corA   | 1344          | 1263           | P   |          | 1802             |
|     |                   |         | phosphoglycerate kinase                             | pgk    | 1345          | 1264           | G   |          |                  |
|     |                   |         | glyceraldehyde-3-phosphate dehydrogenase            | gap_2  | 1346          | 1265           | G   |          |                  |
| 374 | 1381700           | 1381996 | glyceraldehyde-3-phosphate dehydrogenase            | gap_2  | 1346          | 1265           | G   |          | 297              |
|     |                   |         | uracil-DNA glycosylase                              | ung    | 1347          | 1266           | L   |          |                  |
| 375 | 1382211           | 1382629 | uracil-DNA glycosylase                              | ung    | 1347          | 1266           | L   |          | 419              |
| 376 | 1382889           | 1383499 | 1-acyl-SN-glycerol-3-phosphate acyltransferase      | plsC   | 1348          | 1267           | I   |          | 611              |
|     |                   |         | hypothetical protein                                | -      | 1349          | 1268           | -   |          |                  |
| 377 | 1384447           | 1384461 | hypothetical protein                                | -      | 1349          | 1268           | -   |          | 15               |
| 378 | 1385137           | 1385455 | carboxyl-terminal protease                          | prc    | 1350          | 1269           | M   |          | 319              |
| 379 | 1386062           | 1386447 | hypothetical protein                                | -      | 1351          | 1270           | -   |          | 386              |
| 380 | 1386697           | 1388100 | hypothetical protein                                | -      | 1351          | 1270           | -   |          | 1404             |
|     |                   |         | type II DNA modification enzyme (methyltransferase) | -      | 1352          | 1271           | L   |          |                  |
| 381 | 1388856           | 1388922 | hypothetical protein                                | -      | 1353/<br>1354 | 1272           | R   |          | 67               |
|     |                   |         | hypothetical protein                                | -      | 1353/<br>1354 | 1272           | R   |          |                  |
| 382 | 1389555           | 1390977 | hypothetical protein                                | -      | 1354          | 1272           | R   |          | 1423             |
| 383 | 1392902           | 1393053 | quinolinate synthetase                              | nadA   | 1356          | 1274           | H   |          | 152              |
| 384 | 1394193           | 1394678 | phosphatidylserine decarboxylase                    | psd    | 1357          | 1275           | I   |          | 486              |
|     |                   |         | hypothetical protein                                | -      | 1358          | 1276           | -   |          |                  |

| No  | Position in NQ352 |         | Annotation <sup>a</sup><br>Description                                   | gene  | HP-<br>number | jhp-<br>number | COG | OMP | Import<br>length |
|-----|-------------------|---------|--------------------------------------------------------------------------|-------|---------------|----------------|-----|-----|------------------|
|     | start             | end     |                                                                          |       |               |                |     |     |                  |
| 385 | 1395128           | 1396918 | hypothetical protein                                                     | -     | 1359          | 1277           | -   |     | 1791             |
|     |                   |         | prenyltransferase                                                        | ubiA  | 1360          | 1278           | H   |     |                  |
|     |                   |         | DNA transfer protein                                                     | comEC | 1361          | 1279           | R   |     |                  |
| 386 | 1397203           | 1401597 | DNA transfer protein                                                     | comEC | 1361          | 1279           | R   |     | 4395             |
|     |                   |         | replicative DNA helicase                                                 | dnaB  | 1362          | 1280           | L   |     |                  |
|     |                   |         | hypothetical protein                                                     | -     | 1363          | 1281           | S   |     |                  |
|     |                   |         | putative histidine kinase sensor protein                                 | -     | 1364          | 1282           | T   |     |                  |
| 387 | 1401816           | 1402333 | putative transcriptional regulator                                       | -     | 1365          | 1283           | TK  |     | 518              |
| 388 | 1402371           | 1402396 | putative transcriptional regulator                                       | -     | 1365          | 1283           | TK  |     | 26               |
| 389 | 1418863           | 1418918 | "putative" plasticity zone and typeIV secretion system tfs3 gene cluster | -     |               |                | -   |     | 56               |
| 390 | 1420651           | 1420805 | "putative" plasticity zone and typeIV secretion system tfs3 gene cluster | -     |               |                | -   |     | 155              |
| 391 | 1421971           | 1422070 | hypothetical protein                                                     | -     |               | 0935           | D   |     | 100              |
| 392 | 1422336           | 1422413 | hypothetical protein                                                     | -     |               | 0935           | D   |     | 78               |
| 393 | 1427449           | 1427560 | "putative"                                                               |       |               |                | -   |     | 112              |
| 394 | 1453798           | 1453888 | type III restriciton enzyme R protein                                    | -     | 1371          | 1285           | -   |     | 91               |
| 395 | 1456398           | 1458370 | rod shape-determining protein MreB                                       | mreB  | 1373          | 1287           | D   |     | 1973             |
|     |                   |         | ATP-dependent protease ATP-binding subunit ClpX                          | clpX  | 1374          | 1288           | O   |     |                  |
| 396 | 1459497           | 1460383 | (3R)-hydroxymyristoyl-ACP dehydratase                                    | fabZ  | 1376          | 1290           | I   |     | 887              |
|     |                   |         | flagellar assembly protein FliW                                          | -     | 1377          | 1291           | S   |     |                  |
| 397 | 1461076           | 1461286 | hypothetical protein                                                     | -     | 1378          | 1292           | R   |     | 211              |
| 398 | 1466174           | 1466782 | putative type III DNA modification enzyme (methyltransferase)            | mod_1 |               | 1296           | L   |     | 609              |
| 399 | 1467123           | 1468136 | putative type III DNA modification enzyme (methyltransferase)            | mod_1 |               | 1296           | L   |     | 1014             |
|     |                   |         | putative type III restriction enzyme                                     | res_1 |               | 1297           | S   |     |                  |
| 400 | 1470438           | 1472749 | putative type III restriction enzyme                                     | res_1 |               | 1297           | S   |     | 2312             |
|     |                   |         | biotin synthase                                                          | bioB  | 1406          | 1298           | H   |     |                  |
|     |                   |         | putative ribonuclease N                                                  | rbn   | 1407          | 1299           | S   |     |                  |
| 401 | 1472755           | 1472777 | no annotation / intergenic                                               |       |               |                |     |     | 23               |
| 402 | 1473244           | 1473300 | no annotation / intergenic                                               |       |               |                |     |     | 57               |
| 403 | 1477311           | 1477480 | hypothetical protein                                                     | -     | 1409          | 1301           | S   |     | 170              |
| 404 | 1478393           | 1479308 | hypothetical protein                                                     | -     | 1409          | 1302           | -   |     | 916              |
|     |                   |         | hypothetical protein                                                     | -     | 1410          | 1303           | L   |     |                  |
| 405 | 1479621           | 1480414 | hypothetical protein                                                     | -     | 1410          | 1303           | L   |     | 794              |
|     |                   |         | hypothetical protein                                                     | -     | 1411          | 1304           | -   |     |                  |
| 406 | 1481558           | 1481588 | hypothetical protein                                                     | -     | 1411          | 1305           | -   |     | 31               |
| 407 | 1487879           | 1488110 | UDP-N-acetylenolpyruvoylglucosamine reductase                            | murB  | 1418          | 1313           | M   |     | 232              |
|     |                   |         | flagellar biosynthesis protein FliQ                                      | fliQ  | 1419          | 1314           | NU  |     |                  |
| 408 | 1488693           | 1489341 | flagellum-specific ATP synthase                                          | fliI  | 1420          | 1315           | NU  |     | 649              |
| 409 | 1491132           | 1492189 | isoleucyl-tRNA synthetase                                                | ileS  | 1422          | 1317           | J   |     | 1058             |
| 410 | 1494528           | 1494594 | no annotation / intergenic                                               |       |               |                |     |     | 67               |
| 411 | 1496859           | 1499776 | hypothetical protein                                                     | -     | 1430          | 1323           | R   |     | 2918             |
|     |                   |         | hypothetical protein                                                     | -     | 1429          | 1324           | M   |     |                  |
|     |                   |         | hypothetical protein                                                     | -     | 1428          | 1325           | R   |     |                  |
| 412 | 1500464           | 1502546 | hypothetical protein                                                     | -     | 1433          | 1326           | -   |     | 2083             |

| No                   | Position in NQ352 |         | Annotation <sup>a</sup>                                      |        |           |            |    | COG | OMP  | Import length |
|----------------------|-------------------|---------|--------------------------------------------------------------|--------|-----------|------------|----|-----|------|---------------|
|                      | start             | end     | Description                                                  | gene   | HP-number | jhp-number |    |     |      |               |
| 413                  | 1509925           | 1510029 | 4-diphosphocytidyl-2-C-methyl-D-erythritol kinase            | -      | 1443      | 1336       | I  |     | 105  |               |
|                      |                   |         | SsrA-binding protein                                         | smpB   | 1444      | 1337       | O  |     |      |               |
| 414                  | 1515176           | 1515527 | tRNA modification GTPase TrmE                                | trmE   | 1452      | 1345       | R  |     | 352  |               |
| 415                  | 1515777           | 1516593 | tRNA modification GTPase TrmE                                | trmE   | 1452      | 1345       | R  |     | 817  |               |
|                      |                   |         | putative outer membrane protein                              | -      | 1453      | 1346       | -  | hom |      |               |
| 416                  | 1519381           | 1520100 | hypothetical protein                                         | -      | 1454      | 1347       | -  |     | 720  |               |
|                      |                   |         | hypothetical protein                                         | -      | 1455      | 1348       | -  |     |      |               |
| 417                  | 1523726           | 1526902 | DNA polymerase III subunit alpha                             | dnaE   | 1460      | 1353       | L  |     | 3177 |               |
| 418                  | 1545640           | 1551952 | thymidylate kinase                                           | tmk    | 1474      | 1367       | F  |     | 6313 |               |
|                      |                   |         | phosphopantetheine adenylyltransferase                       | coaD   | 1475      | 1368       | H  |     |      |               |
|                      |                   |         | 3-octaprenyl-4-hydroxybenzoate carboxy-lyase                 | ubiD   | 1476      | 1369       | H  |     |      |               |
|                      |                   |         | flagellar basal body P-ring biosynthesis protein FlgA        | flgA   | 1477      | 1370       | NO |     |      |               |
|                      |                   |         | putative ATP-dependent DNA helicase                          | rep    | 1478      | 1371       | L  |     |      |               |
| hypothetical protein | -                 | 1479    | 1372                                                         | O      |           |            |    |     |      |               |
| 419                  | 1556074           | 1556274 | hypothetical protein                                         | -      | 1485      | 1378       | S  |     | 201  |               |
| 420                  | 1566606           | 1566607 | transaldolase                                                | tal    | 1495      | 1388       | G  |     | 2    |               |
| 421                  | 1571558           | 1572241 | putative outer membrane protein                              | -      | 1501      | 1394       | -  | hor | 684  |               |
| 422                  | 1572450           | 1572576 | hypothetical protein                                         | -      | 1502      | 1395       | S  |     | 127  |               |
| 423                  | 1572798           | 1574085 | hypothetical protein                                         | -      | 1502      | 1395       | S  |     | 1288 |               |
|                      |                   |         | putative component of cation transport for cbb3-type oxidase | fixI   | 1503      | 1396       | P  |     |      |               |
| 424                  | 1574607           | 1574741 | putative component of cation transport for cbb3-type oxidase | fixI   | 1503      | 1396       | P  |     | 135  |               |
| 425                  | 1578170           | 1580172 | hypothetical protein                                         | -      | 1507      | 1400       | E  |     | 2003 |               |
|                      |                   |         | ferredoxin-like protein                                      | -      | 1508      | 1401       | C  |     |      |               |
| 426                  | 1581042           | 1581105 | putative glycerol-3-phosphate acyltransferase PlsY           | -      | 1509      | 1402       | S  |     | 64   |               |
| 427                  | 1581470           | 1581472 | dihydroneopterin aldolase                                    | folB   | 1510      | 1403       | H  |     | 3    |               |
|                      |                   |         | hypothetical protein                                         | -      | 1511      | 1404       | -  |     |      |               |
| 428                  | 1584657           | 1587413 | selenocysteine synthase                                      | selA   | 1513      | 1406       | E  |     | 2757 |               |
|                      |                   |         | transcription elongation factor NusA                         | nusA   | 1514      | 1407       | K  |     |      |               |
|                      |                   |         | hypothetical protein                                         | -      |           | 1408       | -  |     |      |               |
| 429                  | 1587834           | 1588309 | hypothetical protein                                         | -      |           | 1408       | -  |     | 476  |               |
| 430                  | 1591444           | 1591829 | putative type II DNA modification enzyme (methyltransferase) | -      |           | 1409       | V  |     | 386  |               |
| 431                  | 1592186           | 1599163 | putative type II DNA modification enzyme (methyltransferase) | -      |           | 1409       | V  |     | 6978 |               |
|                      |                   |         | type III restriction enzyme                                  | res_2  | 1521      | 1410       | V  |     |      |               |
|                      |                   |         | type III DNA modification enzyme (methyltransferase)         | mod_2  | 1522      | 1411       | L  |     |      |               |
|                      |                   |         | ATP-dependent DNA helicase RecG                              | recG   | 1523      | 1412       | LK |     |      |               |
| 432                  | 1603386           | 1603643 | chromosomal replication initiation protein                   | dnaA   | 1529      | 1417       | L  |     | 258  |               |
| 433                  | 1606960           | 1607708 | glucosamine-fructose-6-phosphate aminotransferase            | glmS   | 1532      | 1420       | M  |     | 749  |               |
|                      |                   |         | FAD-dependent thymidylate synthase                           | thyX   | 1533      | 1421       | F  |     |      |               |
| 434                  | 1611754           | 1612728 | type I restriction enzyme modification subunit               | hsdM_3 | 1403      | 1423       | V  |     | 975  |               |
|                      |                   |         | type I restricton enzyme restriction subunit                 | hsdR_3 | 1402      | 1424       | V  |     |      |               |
| 435                  | 1618518           | 1618651 | arginase                                                     | rocF   | 1399      | 1427       | E  |     | 134  |               |

| No  | Position in NQ352 |         | Annotation <sup>a</sup>                                                                                                    |                 |                      |                      |             |     |               |
|-----|-------------------|---------|----------------------------------------------------------------------------------------------------------------------------|-----------------|----------------------|----------------------|-------------|-----|---------------|
|     | start             | end     | Description                                                                                                                | gene            | HP-number            | jhp-number           | COG         | OMP | Import length |
| 436 | 1619944           | 1620040 | amino acid permease -HPAG1_1471                                                                                            | -               |                      | -                    | E           |     | 97            |
| 437 | 1621021           | 1621670 | amino acid permease -HPAG1_1471<br>L-alanine dehydrogenase                                                                 | -<br>ald        | <br>1398             | <br>1428             | E<br>E      |     | 650           |
| 438 | 1627671           | 1629463 | DNA repair protein (recombination protein N)<br>fibronectin/ fibrinogen-binding protein                                    | recN<br>-       | 1393<br>1392         | 1434<br>1435         | L<br>K      |     | 1793          |
| 439 | 1634151           | 1635370 | ribulose-phosphate 3-epimerase<br>fructose-1,6-bisphosphatase<br>hypothetical protein                                      | rpe<br>fbp<br>- | 1386<br>1385<br>1384 | 1439<br>1440<br>1441 | G<br>G<br>- |     | 1220          |
| 440 | 1635627           | 1636901 | type IIS restriction enzyme M2 protein (mod)<br>type IIS restriction enzyme M1 protein (mod)<br>type II restriction enzyme | -<br>-<br>-     | 1368<br>1367<br>1366 | <br><br>1442         | L<br>L<br>- |     | 1275          |
| 441 | 1638527           | 1639210 | type II restriction enzyme                                                                                                 | -               | 1366                 | 1442                 | -           |     | 684           |

- <sup>a</sup> Annotation is based on an automatic annotation, generated with the Kodon software using the J99 annotation as a reference. The annotation of predicted ORFs with no homologue in J99 was done manually by means of BLAST searches. COG classifications are primarily based on J99 as of May 2010.



**Table S10: Clusters of nucleotide polymorphisms (CNPs)/ imports in strain pair NQ392/4060. Positions refer to the position in the virtual genome of the first isolate NQ392.**

| No | Position in NQ392 |         | Corresponding import in NQ1707 | Annotation <sup>a</sup><br>Description                                                                            | gene              | HP-number            | jhp-number           | COG         | OMP      | Import length |
|----|-------------------|---------|--------------------------------|-------------------------------------------------------------------------------------------------------------------|-------------------|----------------------|----------------------|-------------|----------|---------------|
|    | start             | end     |                                |                                                                                                                   |                   |                      |                      |             |          |               |
| 1  | 181               | 340     |                                | putative type II DNA modification enzyme (methyltransferase)                                                      | -                 |                      | 1409                 | V           |          | 160           |
| 2  | 19264             | 19897   |                                | putative type I restriction enzyme specificity subunit<br>type I restriction enzyme modification subunit          | hsdS_3a<br>hsdM_3 | 1403                 | 1422<br>1423         | V<br>V      |          | 634           |
| 3  | 21205             | 21303   |                                | type I restriction enzyme modification subunit                                                                    | hsdM_3            | 1403                 | 1423                 | V           |          | 99            |
| 4  | 103596            | 104211  |                                | putative outer membrane protein                                                                                   | -                 | 0009                 | 0007                 | -           | hop      | 616           |
| 5  | 265304            | 265362  |                                | putative transcriptional regulator                                                                                | -                 | 0166                 | 0152                 | TK          |          | 59            |
| 6  | 355503            | 355692  |                                | ABC transporter, ATP-binding protein                                                                              | -                 | 0250                 | 0235                 | R           |          | 190           |
| 7  | 359083            | 359130  |                                | putative outer membrane protein                                                                                   | -                 | 0253/<br>0254        | 0238                 | -           | hop      | 48            |
| 8  | 411601            | 411698  |                                | periplasmic dipeptide transport substrate-binding protein                                                         | dppA              | 0298                 | 0283                 | E           |          | 98            |
| 9  | 411948            | 412642  |                                | periplasmic dipeptide transport substrate-binding protein                                                         | dppA              | 0298                 | 0283                 | E           |          | 695           |
| 10 | 413618            | 413987  |                                | peptide ABC transporter permease                                                                                  | dppB              | 0299                 | 0284                 | EP          |          | 370           |
| 11 | 430781            | 430785  |                                | no annotation/ intergenic                                                                                         |                   |                      |                      |             |          | 5             |
| 12 | 432110            | 432153  |                                | outer membrane protein-adhesin                                                                                    | babA              | 1243                 | 0833                 | -           | hop      | 44            |
| 13 | 432994            | 433236  |                                | hypothetical protein                                                                                              | -                 | 0318                 | 0301                 | P           |          | 243           |
| 14 | 433556            | 433674  |                                | hypothetical protein                                                                                              | -                 | 0318                 | 0301                 | P           |          | 119           |
| 15 | 704485            | 704795  |                                | putative efflux transporter<br>putative efflux transporter                                                        | -<br>-            | 0606<br>0607         | 0553<br>0554         | M<br>V      |          | 311           |
| 16 | 705305            | 705512  |                                | putative efflux transporter                                                                                       | -                 | 0607                 | 0554                 | V           |          | 208           |
| 17 | 760307            | 760315  |                                | alpha (1,3)-fucosyltransferase                                                                                    | fucT              | 0651                 | 0596                 | -           |          | 9             |
| 18 | 787411            | 787602  |                                | hypothetical protein                                                                                              | -                 |                      | 0616                 | -           |          | 192           |
| 19 | 789932            | 790082  |                                | "putative" - similar to jhp0914                                                                                   |                   |                      |                      | -           |          | 151           |
| 20 | 799727            | 799819  |                                | iron(III) dicitrate transport protein                                                                             | fecA_1            | 0686                 | 0626                 | P           | family 4 | 93            |
| 21 | 841413            | 841548  |                                | putative outer membrane protein                                                                                   | -                 | 0722                 | 0659                 | -           | hop      | 136           |
| 22 | 846387            | 846389  | CNP 4                          | putative outer membrane protein                                                                                   | -                 | 0725                 | 0662                 | -           | hop      | 3             |
| 23 | 846996            | 847011  | CNP 5                          | putative outer membrane protein                                                                                   | -                 | 0725                 | 0662                 | -           | hop      | 16            |
| 24 | 913426            | 913441  | CNP 6 (partially)              | anti-codon nuclease masking agent                                                                                 | prrB              | 0790                 |                      | V           |          | 16            |
| 25 | 936676            | 936891  |                                | flagellar motor protein MotB<br>hypothetical protein                                                              | motB<br>-         | 0816<br>0817         | 0752<br>0753         | N<br>-      |          | 216           |
| 26 | 958047            | 958165  |                                | putative outer membrane protein                                                                                   | -                 | 0839                 | 0777                 | I           | other    | 119           |
| 27 | 1076240           | 1079370 |                                | prolipoprotein diacylglyceryl transferase<br>hypothetical protein<br>3-deoxy-D-manno-octulosonic-acid transferase | lgt<br>-<br>waaA  | 0955<br>0956<br>0957 | 0889<br>0890<br>0891 | M<br>J<br>M |          | 3131          |

| No | Position in NQ392 |         | Corresponding import in NQ1707 | Annotation <sup>a</sup>                    |  | gene | HP-number     | jhp-number | COG | OMP | Import length |
|----|-------------------|---------|--------------------------------|--------------------------------------------|--|------|---------------|------------|-----|-----|---------------|
|    | start             | end     |                                | Description                                |  |      |               |            |     |     |               |
|    |                   |         |                                | hypothetical protein                       |  | -    | 0958          | 0892       | R   |     |               |
|    |                   |         |                                | hypothetical protein                       |  | -    | 0959          | 0893       | S   |     |               |
| 28 | 1079679           | 1079977 |                                | hypothetical protein                       |  | -    | 0959          | 0893       | S   |     | 299           |
|    |                   |         |                                | glycyl-tRNA synthetase subunit alpha       |  | glyQ | 0960          | 0894       | J   |     |               |
| 29 | 1189463           | 1189597 |                                | protein-L-isoaspartate O-methyltransferase |  | pcm  | 0363          | 1017       | O   |     | 135           |
| 30 | 1204822           | 1204874 |                                | no annotation/ intergenic                  |  |      |               |            |     |     | 53            |
| 31 | 1244241           | 1244417 |                                | no annotation/ intergenic                  |  |      |               |            |     |     | 177           |
| 32 | 1247046           | 1247215 |                                | hypothetical protein                       |  | -    | 1145<br>/1146 | 1073       | S   |     | 170           |
| 33 | 1279671           | 1280404 |                                | hypothetical protein                       |  | -    | 1175          | 1102       | R   |     | 734           |
| 34 | 1282180           | 1282562 |                                | putative outer membrane function           |  | -    | 1177          | 1103       | -   | hop | 383           |
| 35 | 1282853           | 1283089 |                                | putative outer membrane function           |  | -    | 1177          | 1103       | -   | hop | 237           |
| 36 | 1301534           | 1301602 |                                | putative motility protein                  |  | -    | 1192          | 1117       | -   |     | 69            |
| 37 | 1413271           | 1413304 |                                | 50S ribosomal protein L16                  |  | rplP | 1312          | 1232       | J   |     | 34            |
| 38 | 1419026           | 1419188 |                                | hypothetical protein                       |  | -    | 1322          | 1242       | -   |     | 163           |
| 39 | 1437957           | 1437984 |                                | putative outer membrane protein            |  | -    | 1342          | 1261       | -   | hop | 28            |
| 40 | 1571118           | 1571131 |                                | no annotation/ intergenic                  |  |      |               |            |     |     | 14            |
| 41 | 1646081           | 1646547 |                                | selenocysteine synthase                    |  | selA | 1513          | 1406       | E   |     | 467           |
|    |                   |         |                                | transcription elongation factor NusA       |  | nusA | 1514          | 1407       | K   |     |               |

<sup>a</sup> Annotation is based on an automatic annotation, generated with the Kodon software using the J99 annotation as a reference. The annotation of predicted ORFs with no homologue in J99 was done manually by means of BLAST searches. COG classifications are primarily based on J99 as of May 2010.

**Table S11: Clusters of nucleotide polymorphisms (CNPs)/ imports in strain pair NQ367/4191. Positions refer to the position in the virtual genome of the first isolate NQ367.**

| No | Position in NQ367 |        | Corresponding import in NQ1671 | Annotation <sup>a</sup><br>Description        | Gene   | HP-number     | jhp-number | COG | OMP | Import length |
|----|-------------------|--------|--------------------------------|-----------------------------------------------|--------|---------------|------------|-----|-----|---------------|
|    | start             | end    |                                |                                               |        |               |            |     |     |               |
| 1  | 54489             | 54515  | -                              | 6,7-dimethyl-8-ribityllumazine synthase       | ribH   | 0002          | 0002       | H   |     | 27            |
| 2  | 88260             | 89334  | -                              | hypothetical protein                          | -      | 0035          | 0031       | S   |     | 1075          |
|    |                   |        |                                | hypothetical protein                          | -      | 0036          | 0032       | -   |     |               |
|    |                   |        |                                | hypothetical protein                          | -      | 0037          | 0033       | U   |     |               |
| 3  | 92434             | 93107  | -                              | DNA transformation competency                 | comB3  | 0041/<br>0042 | 0036       | U   |     | 674           |
| 4  | 110917            | 110919 | -                              | proline/pyrroline-5-carboxylate dehydrogenase | putA   | 0056          | 0048       | C   |     | 3             |
| 5  | 116116            | 116144 | -                              | hypothetical protein                          | -      | 0060          | 0055       | -   |     | 29            |
| 6  | 117842            | 118200 | -                              | hypothetical protein                          | -      | 0063          | 0058       | -   |     | 359           |
| 7  | 118486            | 118564 | -                              | hypothetical protein                          | -      | 0063          | 0058       | -   |     | 79            |
| 8  | 121924            | 122022 | -                              | hypothetical protein                          | -      | 0066          | 0061       | D   |     | 99            |
| 9  | 127317            | 129003 | -                              | urease subunit beta                           | ureB   | 0072          | 0067       | E   |     | 1687          |
|    |                   |        |                                | urease subunit alpha                          | ureA   | 0073          | 0068       | E   |     |               |
|    |                   |        |                                | lipoprotein signal peptidase                  | lspA   | 0074          | 0069       | MU  |     |               |
|    |                   |        |                                | phosphoglucosamine mutase                     | glmM   | 0075          | 0070       | G   |     |               |
| 10 | 136704            | 138632 | -                              | methyl-accepting chemotaxis protein (MCP)     | -      | 0082          | 0075       | NT  |     | 1929          |
| 11 | 140648            | 140926 | -                              | hypothetical protein                          | -      | 0086          | 0079       | R   |     | 279           |
| 12 | 154047            | 154439 | -                              | methyl-accepting chemotaxis protein (MCP)     | -      | 0099          | 0091       | NT  |     | 393           |
| 13 | 161882            | 161932 | -                              | 2',3'-cyclic-nucleotide 2'-phosphodiesterase  | cpdB   | 0104          | 0096       | F   |     | 51            |
| 14 | 178652            | 178824 | -                              | hypothetical protein                          | -      | 0118          | 0110       | -   |     | 173           |
| 15 | 184565            | 184568 | CNP 1                          | translation initiation factor IF-3            | infC   | 0124          | 0114       | J   |     | 4             |
| 16 | 184985            | 185277 | CNP 2                          | translation initiation factor IF-3            | infC   | 0124          | 0114       | J   |     | 293           |
|    |                   |        |                                | 50S ribosomal protein L35                     | rpmI   | 0125          | 0115       | J   |     |               |
| 17 | 185526            | 186814 | CNP 3                          | 50S ribosomal protein L20                     | rpIT   | 0126          | 0116       | J   |     | 1289          |
|    |                   |        |                                | putative outer membrane protein               | -      | 0127          | 0117       | -   | hor |               |
| 18 | 199704            | 199784 | SNP                            | L-lactate permease                            | lldP_1 | 0140          | 0128       | C   |     | 81            |
| 19 | 200401            | 201190 | CNP 4 (partially)              | L-lactate permease                            | lldp_2 | 0141          | 0129       | C   |     | 790           |
| 20 | 201646            | 203016 | CNP 5 (partially)              | DNA glycosylase MutY                          | mutY   | 0142          | 0130       | L   |     | 1371          |

| No | Position in NQ367 |        | Corresponding import in NQ1671 | Annotation <sup>a</sup>                                   |  | Gene | HP-number | jhp-number | COG | OMP | Import length |
|----|-------------------|--------|--------------------------------|-----------------------------------------------------------|--|------|-----------|------------|-----|-----|---------------|
|    | start             | end    |                                | Description                                               |  |      |           |            |     |     |               |
|    |                   |        |                                | hypothetical protein                                      |  | -    | 0143      | 0131       | P   |     |               |
| 21 | 203223            | 203470 | <i>CNP 6 (partially)</i>       | hypothetical protein                                      |  | -    | 0143      | 0131       | P   |     | 248           |
| 22 | 207219            | 207815 | CNP 7                          | cytochrome oxidase (CBB3-TYPE)                            |  | fixP | 0147      | 0135       | C   |     | 597           |
|    |                   |        |                                | hypothetical protein                                      |  | -    | 0148      | 0136       | -   |     |               |
|    |                   |        |                                | hypothetical protein                                      |  | -    | 0149      | 0137       | -   |     |               |
| 23 | 216807            | 217075 | <i>CNP 8 (partially)</i>       | hypothetical protein                                      |  | -    | 0160      | 0148       | R   |     | 269           |
| 24 | 239750            | 240212 | -                              | apolipoprotein N-acyltransferase                          |  | Int  | 0180      | 0168       | M   |     | 463           |
| 25 | 263546            | 263696 | -                              | hypothetical protein                                      |  | -    | 0205      | 0191       | E   |     | 151           |
| 26 | 267351            | 267854 | -                              | putative outer membrane protein                           |  | -    | 0209      | 0195       | -   | hof | 504           |
| 27 | 279747            | 281472 | -                              | hypothetical protein                                      |  | -    | 0219      | 0205       | -   |     | 1726          |
|    |                   |        |                                | cysteine desulfurase                                      |  | -    | 0220      | 0206       | E   |     |               |
| 28 | 283552            | 284660 | -                              | DNA repair protein RadA                                   |  | radA | 0223      | 0209       | O   |     | 1109          |
|    |                   |        |                                | bifunctional methionine sulfoxide reductase A/B protein   |  | -    | 0224      | 0210       | O   |     |               |
| 29 | 287257            | 287294 | -                              | putative outer membrane protein                           |  | -    | 0227      | 0212       | -   | hop | 38            |
| 30 | 287300            | 288386 | -                              | putative outer membrane protein                           |  | -    | 0227      | 0212       | -   | hop | 1087          |
| 31 | 291746            | 292044 | -                              | 3-deoxy-manno-oculosonate cytidyltransferase              |  | kdsB | 0230      | 0215       | M   |     | 299           |
| 32 | 293524            | 294489 | -                              | hypothetical protein                                      |  | -    | 0232      | 0217       | -   |     | 966           |
|    |                   |        |                                | hypothetical protein                                      |  | -    | 0233      | 0218       | E   |     |               |
| 33 | 296879            | 297905 | -                              | hypothetical protein                                      |  | -    | 0235      | 0220       | R   |     | 1027          |
|    |                   |        |                                | hypothetical protein                                      |  | -    | 0236      | 0221       | -   |     |               |
| 34 | 320772            | 322081 | -                              | exodeoxyribonuclease VII large subunit                    |  | xseA | 0259      | 0243       | L   |     | 1310          |
|    |                   |        |                                | type II DNA modification enzyme (methyltransferase)       |  | -    | 0260      | 0244       | L   |     |               |
|    |                   |        |                                | hypothetical protein                                      |  | -    | 0261      | 0245       | -   |     |               |
| 35 | 323818            | 324442 | -                              | type II DNA modification enzyme (methyltransferase)       |  | -    | 0263      | 0248       | L   |     | 625           |
|    |                   |        |                                | heat shock protein                                        |  | clpB | 0264      | 0249       | O   |     |               |
| 36 | 345358            | 345391 | -                              | hypothetical protein                                      |  | -    | 0284      | 0269       | M   |     | 34            |
| 37 | 355391            | 357551 | <i>SNP</i>                     | putative vacuolating cytotoxin (VacA) paralog             |  | -    | 0289      | 0274       | N   |     | 2161          |
| 38 | 368110            | 368533 | -                              | periplasmic dipeptide transport substrate-binding protein |  | dppA | 0298      | 0283       | E   |     | 424           |
| 39 | 397362            | 397364 | -                              | cell division inhibitor                                   |  | minD | 0331      | 0314       | D   |     | 3             |
| 40 | 458034            | 460119 | -                              | translation initiation factor IF-2                        |  | infB | 1048      | 0377       | J   |     | 2086          |
| 41 | 460375            | 460526 | -                              | ribosome binding factor A                                 |  | rbfA | 1047      | 0378       | J   |     | 152           |
| 42 | 496825            | 497803 | -                              | polyphosphate kinase                                      |  | ppk  | 1010      | 0413       | P   |     | 979           |
| 43 | 498444            | 498560 | -                              | no annotation/ intergenic                                 |  |      |           |            |     |     | 117           |

| No | Position in NQ367 |        | Corresponding import in NQ1671 | Annotation <sup>a</sup>                                            |        | Gene          | HP-number | jhp-number | COG | OMP  | Import length |
|----|-------------------|--------|--------------------------------|--------------------------------------------------------------------|--------|---------------|-----------|------------|-----|------|---------------|
|    | start             | end    |                                | Description                                                        |        |               |           |            |     |      |               |
| 44 | 498927            | 499856 | -                              | type I restriction enzyme S protein (hsdS)                         | -      | 0462          |           | V          |     | 930  |               |
|    |                   |        |                                | type I restriction enzyme (modification subunit)                   | hsdM_1 | 0463          | 0415      | V          |     |      |               |
| 45 | 500072            | 500082 | -                              | type I restriction enzyme (modification subunit)                   | hsdM_1 | 0463          | 0415      | V          |     | 11   |               |
| 46 | 500829            | 501361 | -                              | type I restriction enzyme (modification subunit)                   | hsdM_1 | 0463          | 0415      | V          |     | 533  |               |
|    |                   |        |                                | fragment of type I restriction enzyme R protein (hsdR)             | -      | 0464          | 0416      | V          |     |      |               |
| 47 | 527296            | 527692 | -                              | outer membrane protein                                             | -      | 0486          | 0438      | -          | hof | 397  |               |
| 48 | 541655            | 542116 | -                              | putative phospholipase A1                                          | p1dA   | 0499          | 0451      | M          |     | 462  |               |
| 49 | 542790            | 542797 | -                              | DNA polymerase III subunit beta                                    | dnaN   | 0500          | 0452      | L          |     | 8    |               |
| 50 | 550896            | 551456 | -                              | hypothetical protein                                               | -      | 0508          | 0458      | -          |     | 561  |               |
|    |                   |        |                                | putative glycolate oxidase                                         | glcD   | 0509          | 0459      | C          |     |      |               |
| 51 | 576609            | 577181 | -                              | cag island protein                                                 | orf15  | 0528          | 0477      | U          |     | 573  |               |
| 52 | 577417            | 577428 | -                              | cag island protein                                                 | orf16  | 0529          | 0478      | -          |     | 12   |               |
| 53 | 597023            | 597257 | CNP 10 (partially)             | cag island protein, cytotoxicity associated immunodominant antigen | cagA   | 0547          | 0495      | -          |     | 235  |               |
| 54 | 598485            | 598614 | -                              | cag island protein, cytotoxicity associated immunodominant antigen | cagA   | 0547          | 0495      | -          |     | 130  |               |
| 55 | 608002            | 608770 | -                              | acetyl-coenzyme A carboxylase subunit alpha                        | accA   | 0557          | 0504      | I          |     | 769  |               |
|    |                   |        |                                | 3-oxoacyl-(acyl carrier protein) synthase II                       | fabB   | 0558          | 0505      | IQ         |     |      |               |
| 56 | 665272            | 665368 | -                              | putative vacuolating cytotoxin (VacA) paralog                      | -      | 0609/<br>0610 | 0556      | N          |     | 97   |               |
| 57 | 690907            | 692173 | -                              | hydrogenase, small subunit                                         | hyaA   | 0631          | 0574      | C          |     | 1267 |               |
|    |                   |        |                                | hydrogenase, large subunit                                         | hyaB   | 0632          | 0575      | C          |     |      |               |
| 58 | 696460            | 696612 | -                              | hypothetical protein                                               | -      | 0636          | 0579      | -          |     | 153  |               |
| 59 | 736230            | 736459 | -                              | integrase-recombinase protein (XERCDC family)                      | -      | 0675          | 0617      | L          |     | 230  |               |
| 60 | 736667            | 737772 | -                              | integrase-recombinase protein (XERCDC family)                      | -      | 0675          | 0617      | L          |     | 1106 |               |
|    |                   |        |                                | methylated-DNA-protein-cysteine methyltransferase                  | ogt    | 0676          | 0618      | L          |     |      |               |
| 61 | 738035            | 739130 | -                              | hypothetical protein                                               | -      | 0677          | 0619      | R          |     | 1096 |               |
|    |                   |        |                                | putative lipopolysaccharide biosynthesis protein                   | -      | 0679          | 0620      | R          |     |      |               |
| 62 | 739344            | 739594 | -                              | putative lipopolysaccharide biosynthesis protein                   | -      | 0679          | 0620      | R          |     | 251  |               |
| 63 | 739836            | 741206 | -                              | ribonucleotide-diphosphate reductase subunit alpha                 | nrdA   | 0680          | 0621      | F          |     | 1371 |               |
| 64 | 741821            | 741977 | -                              | ribonucleotide-diphosphate reductase subunit alpha                 | nrdA   | 0680          | 0621      | F          |     | 157  |               |
| 65 | 742558            | 742624 | -                              | hypothetical protein                                               | -      | 0681          | 0622      | -          |     | 67   |               |
| 66 | 787373            | 788028 | SNP                            | putative outer membrane protein                                    | -      | 0725          | 0662      | -          | hop | 656  |               |

| No | Position in NQ367 |        | Corresponding import in NQ1671 | Annotation <sup>a</sup>                                                                  |        | Gene       | HP-number | jhp-number | COG      | OMP  | Import length |
|----|-------------------|--------|--------------------------------|------------------------------------------------------------------------------------------|--------|------------|-----------|------------|----------|------|---------------|
|    | start             | end    |                                | Description                                                                              |        |            |           |            |          |      |               |
| 67 | 788647            | 789174 | -                              | putative outer membrane protein                                                          | -      | 0725       | 0662      | -          | hop      | 528  |               |
| 68 | 792285            | 794068 | -                              | putative outer membrane protein                                                          | -      | 0722       | 0659      | -          | hop      | 1784 |               |
|    |                   |        |                                | putative outer membrane protein                                                          | -      | 0726       | 0663      | -          | other    |      |               |
| 69 | 828238            | 828245 | -                              | phosphodiesterase                                                                        | -      | 0760       | 0697      | R          |          | 8    |               |
|    |                   |        |                                | hypothetical protein                                                                     | -      | 0761       | 0698      | H          |          |      |               |
| 70 | 849294            | 850422 | -                              | hypothetical protein                                                                     | -      | 0781       | 0718      | L          |          | 1129 |               |
|    |                   |        |                                | putative outer membrane protein                                                          | -      | 0782       | 0719      | -          | hof      |      |               |
| 71 | 870771            | 871722 | -                              | bifunctional 3,4-dihydroxy-2-butanone 4-phosphate synthase/GTP cyclohydrolase II protein | ribBA  | 0804       | 0740      | H          |          | 952  |               |
| 72 | 872477            | 874100 | -                              | putative lipopolysaccharide biosynthesis protein                                         | -      | 0805       | 0741      | M          |          | 1624 |               |
|    |                   |        |                                | hypothetical protein                                                                     | -      | 0806       | 0742      | R          |          |      |               |
|    |                   |        |                                | iron(III) dicitrate transport protein                                                    | fecA_2 | 0807       | 0743      | P          | family 4 |      |               |
| 73 | 880037            | 880209 | -                              | molybdopterin-synthase sulfurylase                                                       | moeB   | 0814       | 0750      | H          |          | 173  |               |
| 74 | 880733            | 881135 | -                              | molybdopterin-synthase sulfurylase                                                       | moeB   | 0814       | 0750      | H          |          | 403  |               |
|    |                   |        |                                | flagellar motor protein MotA                                                             | motA   | 0815       | 0751      | N          |          |      |               |
| 75 | 886549            | 888062 | -                              | excinuclease ABC subunit C                                                               | uvrC   | 0821       | 0760      | L          |          | 1514 |               |
|    |                   |        |                                | homoserine dehydrogenase                                                                 | hom    | 0822       | 0761      | E          |          |      |               |
| 76 | 893161            | 894358 | -                              | F0F1 ATP synthase subunit A                                                              | atpB   | 0828       | 0767      | C          |          | 1198 |               |
|    |                   |        |                                | inosine-5'-monophosphate dehydrogenase                                                   | guaB   | 0829       | 0768      | F          |          |      |               |
| 77 | 895074            | 895082 | -                              | aspartyl/glutamyl-tRNA amidotransferase subunit A                                        | gatA   | 0830       | 0769      | J          |          | 9    |               |
| 78 | 900054            | 902239 | -                              | GTP-binding protein EngA                                                                 | engA   | 0834       | 0773      | R          |          | 2186 |               |
|    |                   |        |                                | DNA-binding protein Hu                                                                   | -      | 0835       | 0774      | L          |          |      |               |
|    |                   |        |                                | hypothetical protein                                                                     | -      | 0836/ 0837 | 0775      | S          |          |      |               |
|    |                   |        |                                | hypothetical protein                                                                     | -      | 0838       | 0776      | -          |          |      |               |
| 79 | 910113            | 910373 | -                              | type I restriction enzyme (restriction subunit)                                          | hsdR_2 | 0846       | 0784      | V          |          | 261  |               |
| 80 | 911288            | 913314 | -                              | type I restriction enzyme (restriction subunit)                                          | hsdR_2 | 0846       | 0784      | V          |          | 2027 |               |
|    |                   |        |                                | anti-codon nuclease masking agent (prfB)                                                 | -      | 0790       |           | V          |          |      |               |
| 81 | 919474            | 921004 | -                              | guanosine 5'-monophosphate oxidoreductase                                                | guaC   | 0854       | 0790      | F          |          | 1531 |               |
|    |                   |        |                                | phosphoheptose isomerase                                                                 | gmhA   | 0857       | 0791      | G          |          |      |               |
|    |                   |        |                                | putative ADP-D-glycero-D-mannoheptose synthase"                                          | waaE   | 0858       | 0792      | M          |          |      |               |
| 82 | 921214            | 922287 | -                              | putative ADP-D-glycero-D-mannoheptose synthase                                           | waaE   | 0858       | 0792      | M          |          | 1074 |               |
|    |                   |        |                                | ADP-L-glycero-D-mannoheptose-6-epimerase                                                 | gmhD   | 0859       | 0793      | MG         |          |      |               |
| 83 | 923004            | 923007 | -                              | ADP-L-glycero-D-mannoheptose-6-epimerase                                                 | gmhD   | 0859       | 0793      | MG         |          | 4    |               |

| No  | Position in NQ367 |         | Corresponding import in NQ1671 | Annotation <sup>a</sup>                                      |      | Gene | HP-number | jhp-number | COG | OMP  | Import length |
|-----|-------------------|---------|--------------------------------|--------------------------------------------------------------|------|------|-----------|------------|-----|------|---------------|
|     | start             | end     |                                | Description                                                  |      |      |           |            |     |      |               |
| 84  | 923388            | 923794  | -                              | hypothetical protein                                         | -    | 0860 | 0794      | E          |     | 407  |               |
|     |                   |         |                                | hypothetical protein                                         | -    | 0861 | 0795      | S          |     |      |               |
| 85  | 924377            | 924379  | CNP 16                         | hypothetical protein                                         | -    | 0861 | 0795      | S          |     | 3    |               |
| 86  | 929445            | 929501  | -                              | hypothetical protein                                         | -    | 0868 | 0802      | -          |     | 57   |               |
| 87  | 936705            | 937184  | CNP 17 (partially)             | catalase                                                     | katA | 0875 | 0809      | P          |     | 480  |               |
| 88  | 946383            | 946827  | -                              | hypothetical protein                                         | -    | 0885 | 0817      | R          |     | 445  |               |
| 89  | 947061            | 947064  | -                              | cysteinyl-tRNA synthetase                                    | cysS | 0886 | 0818      | J          |     | 4    |               |
| 90  | 959612            | 959874  | -                              | outer membrane protein-adhesin                               | babA | 1243 | 0833      | -          | hop | 263  |               |
| 91  | 963928            | 964230  | -                              | acetate kinase                                               | ackA | 0903 | 0840      | C          |     | 303  |               |
| 92  | 1018022           | 1018691 | -                              | hypothetical protein                                         | -    | 0946 | 0880      | C          |     | 670  |               |
|     |                   |         |                                | hypothetical protein                                         | -    | 0947 | 0881      | -          |     |      |               |
| 93  | 1019663           | 1020471 | -                              | hypothetical protein                                         | -    | 0948 | 0882      | -          |     | 809  |               |
|     |                   |         |                                | rRNA large subunit methyltransferase                         | -    | 0949 | 0883      | S          |     |      |               |
| 94  | 1020704           | 1020750 | -                              | rRNA large subunit methyltransferase                         | -    | 0949 | 0883      | S          |     | 47   |               |
| 95  | 1078887           | 1080577 | -                              | hypothetical protein                                         | -    |      | 0928      | KL         |     | 1691 |               |
| 96  | 1097117           | 1097486 | -                              | arginine decarboxylase                                       | speA | 0422 | 0962      | E          |     | 370  |               |
| 97  | 1128133           | 1129204 | -                              | hypothetical protein                                         | -    | 0395 | 0986      | R          |     | 1072 |               |
|     |                   |         |                                | hypothetical protein                                         | -    | 0394 | 0987      | S          |     |      |               |
| 98  | 1131411           | 1133183 | -                              | histidine kinase                                             | cheA | 0392 | 0989      | NT         |     | 1773 |               |
|     |                   |         |                                | histidine kinase-MCP coupling protein                        | cheW | 0391 | 0990      | NT         |     |      |               |
| 99  | 1143361           | 1143508 | -                              | alpha-(1,3)-fucosyltransferase                               | fucU | 0379 | 1002      | -          |     | 148  |               |
|     |                   |         |                                | putative cytochrome C-type biogenesis protein                | -    | 0378 | 1003      | O          |     |      |               |
| 100 | 1155688           | 1155792 | -                              | putative type II DNA modification enzyme (methyltransferase) | -    | 0369 | 1012      | -          |     | 105  |               |
| 101 | 1156094           | 1156244 | -                              | putative type II DNA modification enzyme (methyltransferase) | -    | 0369 | 1012      | -          |     | 151  |               |
|     |                   |         |                                | hypothetical protein                                         | -    | 0368 | 1013      | -          |     |      |               |
| 102 | 1172779           | 1173423 | -                              | glucokinase                                                  | glk  | 1103 | 1029      | G          |     | 645  |               |
|     |                   |         |                                | zinc-dependent alcohol dehydrogenase                         | -    | 1104 | 1030      | R          |     |      |               |
| 103 | 1173626           | 1174328 | -                              | zinc-dependent alcohol dehydrogenase                         | -    | 1104 | 1030      | R          |     | 703  |               |
|     |                   |         |                                | putative lipopolysaccharide biosynthesis protein             | -    | 1105 | 1031      | M          |     |      |               |
| 104 | 1175249           | 1175573 | -                              | putative lipopolysaccharide biosynthesis protein             | -    |      | 1032      | M          |     | 325  |               |
| 105 | 1175829           | 1175989 | -                              | putative lipopolysaccharide biosynthesis protein             | -    |      | 1032      | M          |     | 161  |               |
| 106 | 1184522           | 1185290 | -                              | excinuclease ABC subunit B                                   | uvrB | 1114 | 1041      | L          |     | 769  |               |

| No  | Position in NQ367 |         | Corresponding import in NQ1671 | Annotation <sup>a</sup>                                                         |        | Gene | HP-number | jhp-number | COG   | OMP | Import length |
|-----|-------------------|---------|--------------------------------|---------------------------------------------------------------------------------|--------|------|-----------|------------|-------|-----|---------------|
|     | start             | end     |                                | Description                                                                     |        |      |           |            |       |     |               |
| 107 | 1185512           | 1186486 | -                              | excinuclease ABC subunit B                                                      | uvrB   | 1114 | 1041      | L          |       |     | 975           |
|     |                   |         |                                | hypothetical protein                                                            | -      | 0489 | 0441      | -          |       |     |               |
| 108 | 1187919           | 1189421 | -                              | hypothetical protein                                                            | -      | 0488 | 0440      | -          |       |     | 1503          |
|     |                   |         |                                | hypothetical protein                                                            | -      | 1117 | 1045      | R          |       |     |               |
| 109 | 1189928           | 1190997 | -                              | gamma-glutamyltranspeptidase                                                    | ggt    | 1118 | 1046      | E          |       |     | 1070          |
| 110 | 1197408           | 1197823 | -                              | putative outer membrane protein                                                 | -      | 1125 | 1054      | M          | other |     | 416           |
| 111 | 1198037           | 1198532 | -                              | translocation protein TolB                                                      | tolB   | 1126 | 1055      | U          |       |     | 496           |
| 112 | 1220571           | 1220726 | -                              | hypothetical protein                                                            | rimM   | 1149 | 1076      | J          |       |     | 156           |
| 113 | 1221616           | 1221743 | -                              | putative signal recognition particle protein                                    | ffh    | 1152 | 1079      | U          |       |     | 128           |
| 114 | 1221980           | 1224054 | -                              | putative signal recognition particle protein                                    | ffh    | 1152 | 1079      | U          |       |     | 2075          |
|     |                   |         |                                | valyl-tRNA synthetase                                                           | valS   | 1153 | 1080      | J          |       |     |               |
| 115 | 1224519           | 1224528 | -                              | valyl-tRNA synthetase                                                           | valS   | 1153 | 1080      | J          |       |     | 10            |
| 116 | 1225274           | 1225588 | -                              | valyl-tRNA synthetase                                                           | valS   | 1153 | 1080      | J          |       |     | 315           |
|     |                   |         |                                | flagellar assembly protein FliW                                                 | -      | 1154 | 1081      | S          |       |     |               |
| 117 | 1226381           | 1226382 | -                              | undecaprenyldiphospho-muramoylpentapeptide beta-N-acetylglucosaminyltransferase | murG   | 1155 | 1082      | M          |       |     | 2             |
| 118 | 1229561           | 1229964 | -                              | putative outer membrane protein                                                 | -      | 1157 | 1084      | -          | hop   |     | 404           |
| 119 | 1230879           | 1230887 | -                              | putative outer membrane protein                                                 | -      | 1157 | 1084      | -          | hop   |     | 9             |
| 120 | 1231763           | 1234424 | -                              | putative outer membrane protein                                                 | -      | 1157 | 1084      | -          | hop   |     | 2662          |
|     |                   |         |                                | pyrroline-5-carboxylate reductase                                               | proC   | 1158 | 1085      | E          |       |     |               |
|     |                   |         |                                | putative cAMP-induced cell filamentation protein                                | fic    | 1159 | 1086      | D          |       |     |               |
| 121 | 1234716           | 1234826 | -                              | putative metalloprotease                                                        | -      | 1160 | 1087      | R          |       |     | 111           |
| 122 | 1240516           | 1240763 | -                              | putative outer membrane protein                                                 | -      | 1167 | 1094      | -          | hof   |     | 248           |
| 123 | 1252393           | 1253748 | -                              | putative outer membrane function                                                | -      | 1177 | 1103      | -          | hop   |     | 1356          |
| 124 | 1263637           | 1263642 | -                              | hypothetical protein                                                            | -      | 1184 | 1110      | V          |       |     | 6             |
| 125 | 1275912           | 1276329 | -                              | DNA-directed RNA polymerase subunit beta/beta'                                  | rpoB   | 1198 | 1121      | K          |       |     | 418           |
| 126 | 1277452           | 1278612 | SNP                            | DNA-directed RNA polymerase subunit beta/beta'                                  | rpoB   | 1198 | 1121      | K          |       |     | 1161          |
| 127 | 1288692           | 1289961 | -                              | ABC transporter ATP-binding protein                                             | -      | 1206 | 1129      | V          |       |     | 1270          |
| 128 | 1290230           | 1292705 | -                              | ABC transporter ATP-binding protein                                             | -      | 1206 | 1129      | V          |       |     | 2476          |
|     |                   |         |                                | hypothetical protein                                                            | -      | 1207 | 1130      | R          |       |     |               |
|     |                   |         |                                | type II DNA modification enzyme (methyltransferase)                             | M.HpyI | 1208 | 1131      | L          |       |     |               |
| 129 | 1293895           | 1293979 | -                              | O-serine acetyltransferase                                                      | cysE   | 1210 | 1133      | E          |       |     | 85            |
| 130 | 1294180           | 1296543 | -                              | hypothetical protein                                                            | -      | 1211 | 1134      | -          |       |     | 2364          |



| No  | Position in NQ367 |         | Corresponding import in NQ1671 | Annotation <sup>a</sup>                       |        | Gene | HP-number | jhp-number | COG | OMP | Import length |
|-----|-------------------|---------|--------------------------------|-----------------------------------------------|--------|------|-----------|------------|-----|-----|---------------|
|     | start             | end     |                                | Description                                   |        |      |           |            |     |     |               |
|     |                   |         |                                | F0F1 ATP synthase subunit C                   | atpE   | 1212 | 1135      | C          |     |     |               |
|     |                   |         |                                | polynucleotide phosphorylase/polyadenylase    | pnp    | 1213 | 1136      | J          |     |     |               |
| 131 | 1302752           | 1306486 | -                              | putative ABC transporter, ATP-binding protein | -      | 1220 | 1141      | V          |     |     | 3735          |
|     |                   |         |                                | hypothetical protein                          | -      | 1221 | 1142      | I          |     |     |               |
|     |                   |         |                                | D-lactate dehydrogenase                       | dld    | 1222 | 1143      | C          |     |     |               |
| 132 | 1307038           | 1307234 | -                              | uroporphyrinogen-III synthase                 | hemD   | 1224 | 1145      | H          |     |     | 197           |
| 133 | 1310170           | 1311087 | -                              | dinucleoside polyphosphate hydrolase          | mutT   | 1228 | 1149      | LR         |     |     | 918           |
|     |                   |         |                                | aspartate kinase                              | lysC   | 1229 | 1150      | E          |     |     |               |
| 134 | 1324969           | 1325063 | -                              | outer membrane protein-adhesin                | babB   | 0896 | 1164      | -          | hop |     | 95            |
| 135 | 1325416           | 1326846 | -                              | outer membrane protein-adhesin                | babB   | 0896 | 1164      | -          | hop |     | 1431          |
| 136 | 1335980           | 1336391 | -                              | hypothetical protein                          | -      | 1252 | 1173      | E          |     |     | 412           |
|     |                   |         |                                | tryptophanyl-tRNA synthetase                  | trpS   | 1253 | 1174      | J          |     |     |               |
| 137 | 1360346           | 1360473 | -                              | no annotation/ intergenic                     |        |      |           |            |     |     | 128           |
| 138 | 1360679           | 1360818 | -                              | tryptophan synthase subunit alpha             | trpA   | 1277 | 1198      | E          |     |     | 140           |
| 139 | 1361124           | 1361264 | -                              | tryptophan synthase subunit alpha             | trpA   | 1277 | 1198      | E          |     |     | 141           |
| 140 | 1382301           | 1382304 | -                              | 50S ribosomal protein L5                      | rplE   | 1307 | 1227      | J          |     |     | 4             |
| 141 | 1385966           | 1386073 | -                              | 50S ribosomal protein L2                      | rplB   | 1316 | 1236      | J          |     |     | 108           |
| 142 | 1386322           | 1386610 | -                              | 50S ribosomal protein L23                     | rplW   | 1317 | 1237      | J          |     |     | 289           |
|     |                   |         |                                | 50S ribosomal protein L4                      | rplD   | 1318 | 1238      | J          |     |     |               |
| 143 | 1389012           | 1389099 | -                              | hypothetical protein                          | -      | 1321 | 1241      | R          |     |     | 88            |
| 144 | 1390389           | 1390394 | -                              | ribonuclease HII                              | rnhB   | 1323 | 1243      | L          |     |     | 6             |
| 145 | 1396455           | 1396945 | -                              | cation efflux system protein                  | czcA_2 | 1329 | 1249      | P          |     |     | 491           |
| 146 | 1404898           | 1405288 | -                              | hypothetical protein                          | -      | 1337 | 1256      | H          |     |     | 391           |
|     |                   |         |                                | nickel responsive regulator                   | -      | 1338 | 1257      | K          |     |     |               |
| 147 | 1406007           | 1406202 | -                              | biopolymer transport protein                  | exbB_2 | 1339 | 1258      | U          |     |     | 196           |
| 148 | 1406735           | 1407856 | -                              | biopolymer transport EXBD protein             | exbD_2 | 1340 | 1259      | U          |     |     | 1122          |
|     |                   |         |                                | siderophore-mediated iron transport protein   | tonB_2 | 1341 | 1260      | M          |     |     |               |
|     |                   |         |                                | putative outer membrane protein               | -      | 0227 | 0212      | -          | hop |     |               |
| 149 | 1408174           | 1409258 | -                              | putative outer membrane protein               | -      | 0227 | 0212      | -          | hop |     | 1085          |
| 150 | 1409776           | 1409809 | -                              | putative outer membrane protein               | -      | 0227 | 0212      | -          | hop |     | 34            |
| 151 | 1415785           | 1416999 | -                              | hypothetical protein                          | -      | 1349 | 1268      | -          |     |     | 1215          |
|     |                   |         |                                | carboxyl-terminal protease                    | prc    | 1350 | 1269      | M          |     |     |               |
| 152 | 1417494           | 1417824 | -                              | carboxyl-terminal protease                    | prc    | 1350 | 1269      | M          |     |     | 331           |

| No  | Position in NQ367 |         | Corresponding import in NQ1671 | Annotation <sup>a</sup>                                       |  | Gene   | HP-number | jhp-number | COG | OMP      | Import length |
|-----|-------------------|---------|--------------------------------|---------------------------------------------------------------|--|--------|-----------|------------|-----|----------|---------------|
|     | start             | end     |                                | Description                                                   |  |        |           |            |     |          |               |
| 153 | 1418038           | 1418277 | -                              | no annotation/ intergenic                                     |  |        |           |            |     |          | 240           |
| 154 | 1418715           | 1420306 | -                              | hypothetical protein                                          |  | -      | 1351      | 1270       | -   |          | 1592          |
|     |                   |         |                                | type II DNA modification enzyme (methyltransferase)           |  | -      | 1352      | 1271       | L   |          |               |
|     |                   |         |                                | hypothetical protein                                          |  | -      | 1354      | 1272       | R   |          |               |
| 155 | 1420959           | 1421010 | -                              | hypothetical protein                                          |  | -      | 1354      | 1272       | R   |          | 52            |
| 156 | 1421293           | 1422216 | -                              | hypothetical protein                                          |  | -      | 1354      | 1272       | R   |          | 924           |
| 157 | 1434040           | 1434055 | CNP 19                         | putative transcriptional regulator                            |  | -      | 1365      | 1283       | TK  |          | 16            |
| 158 | 1434393           | 1434430 | CNP 20                         | no annotation/ intergenic                                     |  |        |           |            |     |          | 38            |
| 159 | 1442119           | 1444661 | -                              | DNA repair protein (recombination protein N)                  |  | recN   | 1393      | 1434       | L   |          | 2543          |
|     |                   |         |                                | hypothetical protein                                          |  | -      | 1394      | 1433       | G   |          |               |
|     |                   |         |                                | hypothetical protein                                          |  | -      | 1395      | 1432       | -   | hor      |               |
| 160 | 1446949           | 1447717 | -                              | L-alanine dehydrogenase                                       |  | ald    | 1398      | 1428       | E   |          | 769           |
| 161 | 1447967           | 1448266 | -                              | amino acid permease                                           |  | -      | 1017      | 0406       | E   |          | 300           |
| 162 | 1448470           | 1448845 | -                              | amino acid permease                                           |  | -      | 1017      | 0406       | E   |          | 376           |
| 163 | 1456339           | 1459549 | -                              | type I restriction enzyme (restriction subunit)               |  | hsdR_3 | 1402      | 1424       | V   |          | 3211          |
|     |                   |         |                                | type I restriction enzyme (modification subunit)              |  | hsdM_3 | 1403      | 1423       | V   |          |               |
| 164 | 1465978           | 1466118 | -                              | chromosomal replication initiation protein                    |  | dnaA   | 1529      | 1417       | L   |          | 141           |
| 165 | 1468776           | 1468987 | CNP 22                         | exodeoxyribonuclease III                                      |  | exoA   | 1526      | 1415       | L   |          | 212           |
| 166 | 1485283           | 1487636 | -                              | putative iron-regulated outer membrane protein                |  | frpB_3 | 1512      | 1405       | P   | family 4 | 2354          |
| 167 | 1536937           | 1537102 | -                              | hypothetical protein                                          |  | -      | 1464      | 1357       | Q   |          | 166           |
| 168 | 1596264           | 1596339 | -                              | no annotation/ intergenic                                     |  |        |           |            |     |          | 76            |
| 169 | 1601621           | 1602000 | -                              | putative type III DNA modification enzyme (methyltransferase) |  | mod_1  |           | 1296       | L   |          | 380           |
| 170 | 1615236           | 1619177 | -                              | type III restriction enzyme R protein                         |  | -      | 1371      | 1285       | -   |          | 3942          |
|     |                   |         |                                | type II DNA modification enzyme (methyltransferase)           |  | -      |           | 1284       | L   |          |               |

<sup>a</sup> Annotation is based on an automatic annotation, generated with the Kodon software using the J99 annotation as a reference. The annotation of predicted ORFs with no homologue in J99 was done manually by means of BLAST searches. COG classifications are primarily based on J99 as of May 2010.

**Table S11: Clusters of nucleotide polymorphisms (CNPs)/ imports in strain pair NQ367/4191. Positions refer to the position in the virtual genome of the first isolate NQ367.**

| No | Position in NQ367 |        | Corresponding import in NQ1671 | Annotation <sup>a</sup><br>Description        | Gene   | HP-number     | jhp-number | COG | OMP | Import length |
|----|-------------------|--------|--------------------------------|-----------------------------------------------|--------|---------------|------------|-----|-----|---------------|
|    | start             | end    |                                |                                               |        |               |            |     |     |               |
| 1  | 54489             | 54515  | -                              | 6,7-dimethyl-8-ribityllumazine synthase       | ribH   | 0002          | 0002       | H   |     | 27            |
| 2  | 88260             | 89334  | -                              | hypothetical protein                          | -      | 0035          | 0031       | S   |     | 1075          |
|    |                   |        |                                | hypothetical protein                          | -      | 0036          | 0032       | -   |     |               |
|    |                   |        |                                | hypothetical protein                          | -      | 0037          | 0033       | U   |     |               |
| 3  | 92434             | 93107  | -                              | DNA transformation competency                 | comB3  | 0041/<br>0042 | 0036       | U   |     | 674           |
| 4  | 110917            | 110919 | -                              | proline/pyrroline-5-carboxylate dehydrogenase | putA   | 0056          | 0048       | C   |     | 3             |
| 5  | 116116            | 116144 | -                              | hypothetical protein                          | -      | 0060          | 0055       | -   |     | 29            |
| 6  | 117842            | 118200 | -                              | hypothetical protein                          | -      | 0063          | 0058       | -   |     | 359           |
| 7  | 118486            | 118564 | -                              | hypothetical protein                          | -      | 0063          | 0058       | -   |     | 79            |
| 8  | 121924            | 122022 | -                              | hypothetical protein                          | -      | 0066          | 0061       | D   |     | 99            |
| 9  | 127317            | 129003 | -                              | urease subunit beta                           | ureB   | 0072          | 0067       | E   |     | 1687          |
|    |                   |        |                                | urease subunit alpha                          | ureA   | 0073          | 0068       | E   |     |               |
|    |                   |        |                                | lipoprotein signal peptidase                  | lspA   | 0074          | 0069       | MU  |     |               |
|    |                   |        |                                | phosphoglucosamine mutase                     | glmM   | 0075          | 0070       | G   |     |               |
| 10 | 136704            | 138632 | -                              | methyl-accepting chemotaxis protein (MCP)     | -      | 0082          | 0075       | NT  |     | 1929          |
| 11 | 140648            | 140926 | -                              | hypothetical protein                          | -      | 0086          | 0079       | R   |     | 279           |
| 12 | 154047            | 154439 | -                              | methyl-accepting chemotaxis protein (MCP)     | -      | 0099          | 0091       | NT  |     | 393           |
| 13 | 161882            | 161932 | -                              | 2',3'-cyclic-nucleotide 2'-phosphodiesterase  | cpdB   | 0104          | 0096       | F   |     | 51            |
| 14 | 178652            | 178824 | -                              | hypothetical protein                          | -      | 0118          | 0110       | -   |     | 173           |
| 15 | 184565            | 184568 | CNP 1                          | translation initiation factor IF-3            | infC   | 0124          | 0114       | J   |     | 4             |
| 16 | 184985            | 185277 | CNP 2                          | translation initiation factor IF-3            | infC   | 0124          | 0114       | J   |     | 293           |
|    |                   |        |                                | 50S ribosomal protein L35                     | rpmI   | 0125          | 0115       | J   |     |               |
| 17 | 185526            | 186814 | CNP 3                          | 50S ribosomal protein L20                     | rpIT   | 0126          | 0116       | J   |     | 1289          |
|    |                   |        |                                | putative outer membrane protein               | -      | 0127          | 0117       | -   | hor |               |
| 18 | 199704            | 199784 | SNP                            | L-lactate permease                            | lldP_1 | 0140          | 0128       | C   |     | 81            |
| 19 | 200401            | 201190 | CNP 4 (partially)              | L-lactate permease                            | lldp_2 | 0141          | 0129       | C   |     | 790           |
| 20 | 201646            | 203016 | CNP 5 (partially)              | DNA glycosylase MutY                          | mutY   | 0142          | 0130       | L   |     | 1371          |

| No | Position in NQ367 |        | Corresponding import in NQ1671 | Annotation <sup>a</sup>                                   |  | Gene | HP-number | jhp-number | COG | OMP | Import length |
|----|-------------------|--------|--------------------------------|-----------------------------------------------------------|--|------|-----------|------------|-----|-----|---------------|
|    | start             | end    |                                | Description                                               |  |      |           |            |     |     |               |
|    |                   |        |                                | hypothetical protein                                      |  | -    | 0143      | 0131       | P   |     |               |
| 21 | 203223            | 203470 | <i>CNP 6 (partially)</i>       | hypothetical protein                                      |  | -    | 0143      | 0131       | P   |     | 248           |
| 22 | 207219            | 207815 | CNP 7                          | cytochrome oxidase (CBB3-TYPE)                            |  | fixP | 0147      | 0135       | C   |     | 597           |
|    |                   |        |                                | hypothetical protein                                      |  | -    | 0148      | 0136       | -   |     |               |
|    |                   |        |                                | hypothetical protein                                      |  | -    | 0149      | 0137       | -   |     |               |
| 23 | 216807            | 217075 | <i>CNP 8 (partially)</i>       | hypothetical protein                                      |  | -    | 0160      | 0148       | R   |     | 269           |
| 24 | 239750            | 240212 | -                              | apolipoprotein N-acyltransferase                          |  | Int  | 0180      | 0168       | M   |     | 463           |
| 25 | 263546            | 263696 | -                              | hypothetical protein                                      |  | -    | 0205      | 0191       | E   |     | 151           |
| 26 | 267351            | 267854 | -                              | putative outer membrane protein                           |  | -    | 0209      | 0195       | -   | hof | 504           |
| 27 | 279747            | 281472 | -                              | hypothetical protein                                      |  | -    | 0219      | 0205       | -   |     | 1726          |
|    |                   |        |                                | cysteine desulfurase                                      |  | -    | 0220      | 0206       | E   |     |               |
| 28 | 283552            | 284660 | -                              | DNA repair protein RadA                                   |  | radA | 0223      | 0209       | O   |     | 1109          |
|    |                   |        |                                | bifunctional methionine sulfoxide reductase A/B protein   |  | -    | 0224      | 0210       | O   |     |               |
| 29 | 287257            | 287294 | -                              | putative outer membrane protein                           |  | -    | 0227      | 0212       | -   | hop | 38            |
| 30 | 287300            | 288386 | -                              | putative outer membrane protein                           |  | -    | 0227      | 0212       | -   | hop | 1087          |
| 31 | 291746            | 292044 | -                              | 3-deoxy-manno-oculosonate cytidyltransferase              |  | kdsB | 0230      | 0215       | M   |     | 299           |
| 32 | 293524            | 294489 | -                              | hypothetical protein                                      |  | -    | 0232      | 0217       | -   |     | 966           |
|    |                   |        |                                | hypothetical protein                                      |  | -    | 0233      | 0218       | E   |     |               |
| 33 | 296879            | 297905 | -                              | hypothetical protein                                      |  | -    | 0235      | 0220       | R   |     | 1027          |
|    |                   |        |                                | hypothetical protein                                      |  | -    | 0236      | 0221       | -   |     |               |
| 34 | 320772            | 322081 | -                              | exodeoxyribonuclease VII large subunit                    |  | xseA | 0259      | 0243       | L   |     | 1310          |
|    |                   |        |                                | type II DNA modification enzyme (methyltransferase)       |  | -    | 0260      | 0244       | L   |     |               |
|    |                   |        |                                | hypothetical protein                                      |  | -    | 0261      | 0245       | -   |     |               |
| 35 | 323818            | 324442 | -                              | type II DNA modification enzyme (methyltransferase)       |  | -    | 0263      | 0248       | L   |     | 625           |
|    |                   |        |                                | heat shock protein                                        |  | clpB | 0264      | 0249       | O   |     |               |
| 36 | 345358            | 345391 | -                              | hypothetical protein                                      |  | -    | 0284      | 0269       | M   |     | 34            |
| 37 | 355391            | 357551 | <i>SNP</i>                     | putative vacuolating cytotoxin (VacA) paralog             |  | -    | 0289      | 0274       | N   |     | 2161          |
| 38 | 368110            | 368533 | -                              | periplasmic dipeptide transport substrate-binding protein |  | dppA | 0298      | 0283       | E   |     | 424           |
| 39 | 397362            | 397364 | -                              | cell division inhibitor                                   |  | minD | 0331      | 0314       | D   |     | 3             |
| 40 | 458034            | 460119 | -                              | translation initiation factor IF-2                        |  | infB | 1048      | 0377       | J   |     | 2086          |
| 41 | 460375            | 460526 | -                              | ribosome binding factor A                                 |  | rbfA | 1047      | 0378       | J   |     | 152           |
| 42 | 496825            | 497803 | -                              | polyphosphate kinase                                      |  | ppk  | 1010      | 0413       | P   |     | 979           |
| 43 | 498444            | 498560 | -                              | no annotation/ intergenic                                 |  |      |           |            |     |     | 117           |

| No | Position in NQ367 |        | Corresponding import in NQ1671 | Annotation <sup>a</sup>                                            |        | Gene          | HP-number | jhp-number | COG | OMP  | Import length |
|----|-------------------|--------|--------------------------------|--------------------------------------------------------------------|--------|---------------|-----------|------------|-----|------|---------------|
|    | start             | end    |                                | Description                                                        |        |               |           |            |     |      |               |
| 44 | 498927            | 499856 | -                              | type I restriction enzyme S protein (hsdS)                         | -      | 0462          |           | V          |     | 930  |               |
|    |                   |        |                                | type I restriction enzyme (modification subunit)                   | hsdM_1 | 0463          | 0415      | V          |     |      |               |
| 45 | 500072            | 500082 | -                              | type I restriction enzyme (modification subunit)                   | hsdM_1 | 0463          | 0415      | V          |     | 11   |               |
| 46 | 500829            | 501361 | -                              | type I restriction enzyme (modification subunit)                   | hsdM_1 | 0463          | 0415      | V          |     | 533  |               |
|    |                   |        |                                | fragment of type I restriction enzyme R protein (hsdR)             | -      | 0464          | 0416      | V          |     |      |               |
| 47 | 527296            | 527692 | -                              | outer membrane protein                                             | -      | 0486          | 0438      | -          | hof | 397  |               |
| 48 | 541655            | 542116 | -                              | putative phospholipase A1                                          | p1dA   | 0499          | 0451      | M          |     | 462  |               |
| 49 | 542790            | 542797 | -                              | DNA polymerase III subunit beta                                    | dnaN   | 0500          | 0452      | L          |     | 8    |               |
| 50 | 550896            | 551456 | -                              | hypothetical protein                                               | -      | 0508          | 0458      | -          |     | 561  |               |
|    |                   |        |                                | putative glycolate oxidase                                         | glcD   | 0509          | 0459      | C          |     |      |               |
| 51 | 576609            | 577181 | -                              | cag island protein                                                 | orf15  | 0528          | 0477      | U          |     | 573  |               |
| 52 | 577417            | 577428 | -                              | cag island protein                                                 | orf16  | 0529          | 0478      | -          |     | 12   |               |
| 53 | 597023            | 597257 | CNP 10 (partially)             | cag island protein, cytotoxicity associated immunodominant antigen | cagA   | 0547          | 0495      | -          |     | 235  |               |
| 54 | 598485            | 598614 | -                              | cag island protein, cytotoxicity associated immunodominant antigen | cagA   | 0547          | 0495      | -          |     | 130  |               |
| 55 | 608002            | 608770 | -                              | acetyl-coenzyme A carboxylase subunit alpha                        | accA   | 0557          | 0504      | I          |     | 769  |               |
|    |                   |        |                                | 3-oxoacyl-(acyl carrier protein) synthase II                       | fabB   | 0558          | 0505      | IQ         |     |      |               |
| 56 | 665272            | 665368 | -                              | putative vacuolating cytotoxin (VacA) paralog                      | -      | 0609/<br>0610 | 0556      | N          |     | 97   |               |
| 57 | 690907            | 692173 | -                              | hydrogenase, small subunit                                         | hyaA   | 0631          | 0574      | C          |     | 1267 |               |
|    |                   |        |                                | hydrogenase, large subunit                                         | hyaB   | 0632          | 0575      | C          |     |      |               |
| 58 | 696460            | 696612 | -                              | hypothetical protein                                               | -      | 0636          | 0579      | -          |     | 153  |               |
| 59 | 736230            | 736459 | -                              | integrase-recombinase protein (XERCDC family)                      | -      | 0675          | 0617      | L          |     | 230  |               |
| 60 | 736667            | 737772 | -                              | integrase-recombinase protein (XERCDC family)                      | -      | 0675          | 0617      | L          |     | 1106 |               |
|    |                   |        |                                | methylated-DNA-protein-cysteine methyltransferase                  | ogt    | 0676          | 0618      | L          |     |      |               |
| 61 | 738035            | 739130 | -                              | hypothetical protein                                               | -      | 0677          | 0619      | R          |     | 1096 |               |
|    |                   |        |                                | putative lipopolysaccharide biosynthesis protein                   | -      | 0679          | 0620      | R          |     |      |               |
| 62 | 739344            | 739594 | -                              | putative lipopolysaccharide biosynthesis protein                   | -      | 0679          | 0620      | R          |     | 251  |               |
| 63 | 739836            | 741206 | -                              | ribonucleotide-diphosphate reductase subunit alpha                 | nrdA   | 0680          | 0621      | F          |     | 1371 |               |
| 64 | 741821            | 741977 | -                              | ribonucleotide-diphosphate reductase subunit alpha                 | nrdA   | 0680          | 0621      | F          |     | 157  |               |
| 65 | 742558            | 742624 | -                              | hypothetical protein                                               | -      | 0681          | 0622      | -          |     | 67   |               |
| 66 | 787373            | 788028 | SNP                            | putative outer membrane protein                                    | -      | 0725          | 0662      | -          | hop | 656  |               |

| No | Position in NQ367 |        | Corresponding import in NQ1671 | Annotation <sup>a</sup>                                                                  |        | Gene       | HP-number | jhp-number | COG      | OMP  | Import length |
|----|-------------------|--------|--------------------------------|------------------------------------------------------------------------------------------|--------|------------|-----------|------------|----------|------|---------------|
|    | start             | end    |                                | Description                                                                              |        |            |           |            |          |      |               |
| 67 | 788647            | 789174 | -                              | putative outer membrane protein                                                          | -      | 0725       | 0662      | -          | hop      | 528  |               |
| 68 | 792285            | 794068 | -                              | putative outer membrane protein                                                          | -      | 0722       | 0659      | -          | hop      | 1784 |               |
|    |                   |        |                                | putative outer membrane protein                                                          | -      | 0726       | 0663      | -          | other    |      |               |
| 69 | 828238            | 828245 | -                              | phosphodiesterase                                                                        | -      | 0760       | 0697      | R          |          | 8    |               |
|    |                   |        |                                | hypothetical protein                                                                     | -      | 0761       | 0698      | H          |          |      |               |
| 70 | 849294            | 850422 | -                              | hypothetical protein                                                                     | -      | 0781       | 0718      | L          |          | 1129 |               |
|    |                   |        |                                | putative outer membrane protein                                                          | -      | 0782       | 0719      | -          | hof      |      |               |
| 71 | 870771            | 871722 | -                              | bifunctional 3,4-dihydroxy-2-butanone 4-phosphate synthase/GTP cyclohydrolase II protein | ribBA  | 0804       | 0740      | H          |          | 952  |               |
| 72 | 872477            | 874100 | -                              | putative lipopolysaccharide biosynthesis protein                                         | -      | 0805       | 0741      | M          |          | 1624 |               |
|    |                   |        |                                | hypothetical protein                                                                     | -      | 0806       | 0742      | R          |          |      |               |
|    |                   |        |                                | iron(III) dicitrate transport protein                                                    | fecA_2 | 0807       | 0743      | P          | family 4 |      |               |
| 73 | 880037            | 880209 | -                              | molybdopterin-synthase sulfurylase                                                       | moeB   | 0814       | 0750      | H          |          | 173  |               |
| 74 | 880733            | 881135 | -                              | molybdopterin-synthase sulfurylase                                                       | moeB   | 0814       | 0750      | H          |          | 403  |               |
|    |                   |        |                                | flagellar motor protein MotA                                                             | motA   | 0815       | 0751      | N          |          |      |               |
| 75 | 886549            | 888062 | -                              | excinuclease ABC subunit C                                                               | uvrC   | 0821       | 0760      | L          |          | 1514 |               |
|    |                   |        |                                | homoserine dehydrogenase                                                                 | hom    | 0822       | 0761      | E          |          |      |               |
| 76 | 893161            | 894358 | -                              | F0F1 ATP synthase subunit A                                                              | atpB   | 0828       | 0767      | C          |          | 1198 |               |
|    |                   |        |                                | inosine-5'-monophosphate dehydrogenase                                                   | guaB   | 0829       | 0768      | F          |          |      |               |
| 77 | 895074            | 895082 | -                              | aspartyl/glutamyl-tRNA amidotransferase subunit A                                        | gatA   | 0830       | 0769      | J          |          | 9    |               |
| 78 | 900054            | 902239 | -                              | GTP-binding protein EngA                                                                 | engA   | 0834       | 0773      | R          |          | 2186 |               |
|    |                   |        |                                | DNA-binding protein Hu                                                                   | -      | 0835       | 0774      | L          |          |      |               |
|    |                   |        |                                | hypothetical protein                                                                     | -      | 0836/ 0837 | 0775      | S          |          |      |               |
|    |                   |        |                                | hypothetical protein                                                                     | -      | 0838       | 0776      | -          |          |      |               |
| 79 | 910113            | 910373 | -                              | type I restriction enzyme (restriction subunit)                                          | hsdR_2 | 0846       | 0784      | V          |          | 261  |               |
| 80 | 911288            | 913314 | -                              | type I restriction enzyme (restriction subunit)                                          | hsdR_2 | 0846       | 0784      | V          |          | 2027 |               |
|    |                   |        |                                | anti-codon nuclease masking agent (prfB)                                                 | -      | 0790       |           | V          |          |      |               |
| 81 | 919474            | 921004 | -                              | guanosine 5'-monophosphate oxidoreductase                                                | guaC   | 0854       | 0790      | F          |          | 1531 |               |
|    |                   |        |                                | phosphoheptose isomerase                                                                 | gmhA   | 0857       | 0791      | G          |          |      |               |
|    |                   |        |                                | putative ADP-D-glycero-D-mannoheptose synthase"                                          | waaE   | 0858       | 0792      | M          |          |      |               |
| 82 | 921214            | 922287 | -                              | putative ADP-D-glycero-D-mannoheptose synthase                                           | waaE   | 0858       | 0792      | M          |          | 1074 |               |
|    |                   |        |                                | ADP-L-glycero-D-mannoheptose-6-epimerase                                                 | gmhD   | 0859       | 0793      | MG         |          |      |               |
| 83 | 923004            | 923007 | -                              | ADP-L-glycero-D-mannoheptose-6-epimerase                                                 | gmhD   | 0859       | 0793      | MG         |          | 4    |               |

| No  | Position in NQ367 |         | Corresponding import in NQ1671 | Annotation <sup>a</sup>                                      |      | Gene | HP-number | jhp-number | COG | OMP  | Import length |
|-----|-------------------|---------|--------------------------------|--------------------------------------------------------------|------|------|-----------|------------|-----|------|---------------|
|     | start             | end     |                                | Description                                                  |      |      |           |            |     |      |               |
| 84  | 923388            | 923794  | -                              | hypothetical protein                                         | -    | 0860 | 0794      | E          |     | 407  |               |
|     |                   |         |                                | hypothetical protein                                         | -    | 0861 | 0795      | S          |     |      |               |
| 85  | 924377            | 924379  | CNP 16                         | hypothetical protein                                         | -    | 0861 | 0795      | S          |     | 3    |               |
| 86  | 929445            | 929501  | -                              | hypothetical protein                                         | -    | 0868 | 0802      | -          |     | 57   |               |
| 87  | 936705            | 937184  | CNP 17 (partially)             | catalase                                                     | katA | 0875 | 0809      | P          |     | 480  |               |
| 88  | 946383            | 946827  | -                              | hypothetical protein                                         | -    | 0885 | 0817      | R          |     | 445  |               |
| 89  | 947061            | 947064  | -                              | cysteinyl-tRNA synthetase                                    | cysS | 0886 | 0818      | J          |     | 4    |               |
| 90  | 959612            | 959874  | -                              | outer membrane protein-adhesin                               | babA | 1243 | 0833      | -          | hop | 263  |               |
| 91  | 963928            | 964230  | -                              | acetate kinase                                               | ackA | 0903 | 0840      | C          |     | 303  |               |
| 92  | 1018022           | 1018691 | -                              | hypothetical protein                                         | -    | 0946 | 0880      | C          |     | 670  |               |
|     |                   |         |                                | hypothetical protein                                         | -    | 0947 | 0881      | -          |     |      |               |
| 93  | 1019663           | 1020471 | -                              | hypothetical protein                                         | -    | 0948 | 0882      | -          |     | 809  |               |
|     |                   |         |                                | rRNA large subunit methyltransferase                         | -    | 0949 | 0883      | S          |     |      |               |
| 94  | 1020704           | 1020750 | -                              | rRNA large subunit methyltransferase                         | -    | 0949 | 0883      | S          |     | 47   |               |
| 95  | 1078887           | 1080577 | -                              | hypothetical protein                                         | -    |      | 0928      | KL         |     | 1691 |               |
| 96  | 1097117           | 1097486 | -                              | arginine decarboxylase                                       | speA | 0422 | 0962      | E          |     | 370  |               |
| 97  | 1128133           | 1129204 | -                              | hypothetical protein                                         | -    | 0395 | 0986      | R          |     | 1072 |               |
|     |                   |         |                                | hypothetical protein                                         | -    | 0394 | 0987      | S          |     |      |               |
| 98  | 1131411           | 1133183 | -                              | histidine kinase                                             | cheA | 0392 | 0989      | NT         |     | 1773 |               |
|     |                   |         |                                | histidine kinase-MCP coupling protein                        | cheW | 0391 | 0990      | NT         |     |      |               |
| 99  | 1143361           | 1143508 | -                              | alpha-(1,3)-fucosyltransferase                               | fucU | 0379 | 1002      | -          |     | 148  |               |
|     |                   |         |                                | putative cytochrome C-type biogenesis protein                | -    | 0378 | 1003      | O          |     |      |               |
| 100 | 1155688           | 1155792 | -                              | putative type II DNA modification enzyme (methyltransferase) | -    | 0369 | 1012      | -          |     | 105  |               |
| 101 | 1156094           | 1156244 | -                              | putative type II DNA modification enzyme (methyltransferase) | -    | 0369 | 1012      | -          |     | 151  |               |
|     |                   |         |                                | hypothetical protein                                         | -    | 0368 | 1013      | -          |     |      |               |
| 102 | 1172779           | 1173423 | -                              | glucokinase                                                  | glk  | 1103 | 1029      | G          |     | 645  |               |
|     |                   |         |                                | zinc-dependent alcohol dehydrogenase                         | -    | 1104 | 1030      | R          |     |      |               |
| 103 | 1173626           | 1174328 | -                              | zinc-dependent alcohol dehydrogenase                         | -    | 1104 | 1030      | R          |     | 703  |               |
|     |                   |         |                                | putative lipopolysaccharide biosynthesis protein             | -    | 1105 | 1031      | M          |     |      |               |
| 104 | 1175249           | 1175573 | -                              | putative lipopolysaccharide biosynthesis protein             | -    |      | 1032      | M          |     | 325  |               |
| 105 | 1175829           | 1175989 | -                              | putative lipopolysaccharide biosynthesis protein             | -    |      | 1032      | M          |     | 161  |               |
| 106 | 1184522           | 1185290 | -                              | excinuclease ABC subunit B                                   | uvrB | 1114 | 1041      | L          |     | 769  |               |

| No  | Position in NQ367 |         | Corresponding import in NQ1671 | Annotation <sup>a</sup>                                                         |        | Gene | HP-number | jhp-number | COG   | OMP | Import length |
|-----|-------------------|---------|--------------------------------|---------------------------------------------------------------------------------|--------|------|-----------|------------|-------|-----|---------------|
|     | start             | end     |                                | Description                                                                     |        |      |           |            |       |     |               |
| 107 | 1185512           | 1186486 | -                              | excinuclease ABC subunit B                                                      | uvrB   | 1114 | 1041      | L          |       |     | 975           |
|     |                   |         |                                | hypothetical protein                                                            | -      | 0489 | 0441      | -          |       |     |               |
| 108 | 1187919           | 1189421 | -                              | hypothetical protein                                                            | -      | 0488 | 0440      | -          |       |     | 1503          |
|     |                   |         |                                | hypothetical protein                                                            | -      | 1117 | 1045      | R          |       |     |               |
| 109 | 1189928           | 1190997 | -                              | gamma-glutamyltranspeptidase                                                    | ggt    | 1118 | 1046      | E          |       |     | 1070          |
| 110 | 1197408           | 1197823 | -                              | putative outer membrane protein                                                 | -      | 1125 | 1054      | M          | other |     | 416           |
| 111 | 1198037           | 1198532 | -                              | translocation protein TolB                                                      | tolB   | 1126 | 1055      | U          |       |     | 496           |
| 112 | 1220571           | 1220726 | -                              | hypothetical protein                                                            | rimM   | 1149 | 1076      | J          |       |     | 156           |
| 113 | 1221616           | 1221743 | -                              | putative signal recognition particle protein                                    | ffh    | 1152 | 1079      | U          |       |     | 128           |
| 114 | 1221980           | 1224054 | -                              | putative signal recognition particle protein                                    | ffh    | 1152 | 1079      | U          |       |     | 2075          |
|     |                   |         |                                | valyl-tRNA synthetase                                                           | valS   | 1153 | 1080      | J          |       |     |               |
| 115 | 1224519           | 1224528 | -                              | valyl-tRNA synthetase                                                           | valS   | 1153 | 1080      | J          |       |     | 10            |
| 116 | 1225274           | 1225588 | -                              | valyl-tRNA synthetase                                                           | valS   | 1153 | 1080      | J          |       |     | 315           |
|     |                   |         |                                | flagellar assembly protein FliW                                                 | -      | 1154 | 1081      | S          |       |     |               |
| 117 | 1226381           | 1226382 | -                              | undecaprenyldiphospho-muramoylpentapeptide beta-N-acetylglucosaminyltransferase | murG   | 1155 | 1082      | M          |       |     | 2             |
| 118 | 1229561           | 1229964 | -                              | putative outer membrane protein                                                 | -      | 1157 | 1084      | -          | hop   |     | 404           |
| 119 | 1230879           | 1230887 | -                              | putative outer membrane protein                                                 | -      | 1157 | 1084      | -          | hop   |     | 9             |
| 120 | 1231763           | 1234424 | -                              | putative outer membrane protein                                                 | -      | 1157 | 1084      | -          | hop   |     | 2662          |
|     |                   |         |                                | pyrroline-5-carboxylate reductase                                               | proC   | 1158 | 1085      | E          |       |     |               |
|     |                   |         |                                | putative cAMP-induced cell filamentation protein                                | fic    | 1159 | 1086      | D          |       |     |               |
| 121 | 1234716           | 1234826 | -                              | putative metalloprotease                                                        | -      | 1160 | 1087      | R          |       |     | 111           |
| 122 | 1240516           | 1240763 | -                              | putative outer membrane protein                                                 | -      | 1167 | 1094      | -          | hof   |     | 248           |
| 123 | 1252393           | 1253748 | -                              | putative outer membrane function                                                | -      | 1177 | 1103      | -          | hop   |     | 1356          |
| 124 | 1263637           | 1263642 | -                              | hypothetical protein                                                            | -      | 1184 | 1110      | V          |       |     | 6             |
| 125 | 1275912           | 1276329 | -                              | DNA-directed RNA polymerase subunit beta/beta'                                  | rpoB   | 1198 | 1121      | K          |       |     | 418           |
| 126 | 1277452           | 1278612 | SNP                            | DNA-directed RNA polymerase subunit beta/beta'                                  | rpoB   | 1198 | 1121      | K          |       |     | 1161          |
| 127 | 1288692           | 1289961 | -                              | ABC transporter ATP-binding protein                                             | -      | 1206 | 1129      | V          |       |     | 1270          |
| 128 | 1290230           | 1292705 | -                              | ABC transporter ATP-binding protein                                             | -      | 1206 | 1129      | V          |       |     | 2476          |
|     |                   |         |                                | hypothetical protein                                                            | -      | 1207 | 1130      | R          |       |     |               |
|     |                   |         |                                | type II DNA modification enzyme (methyltransferase)                             | M.HpyI | 1208 | 1131      | L          |       |     |               |
| 129 | 1293895           | 1293979 | -                              | O-serine acetyltransferase                                                      | cysE   | 1210 | 1133      | E          |       |     | 85            |
| 130 | 1294180           | 1296543 | -                              | hypothetical protein                                                            | -      | 1211 | 1134      | -          |       |     | 2364          |



| No  | Position in NQ367 |         | Corresponding import in NQ1671 | Annotation <sup>a</sup>                       |        | Gene | HP-number | jhp-number | COG | OMP | Import length |
|-----|-------------------|---------|--------------------------------|-----------------------------------------------|--------|------|-----------|------------|-----|-----|---------------|
|     | start             | end     |                                | Description                                   |        |      |           |            |     |     |               |
|     |                   |         |                                | F0F1 ATP synthase subunit C                   | atpE   | 1212 | 1135      | C          |     |     |               |
|     |                   |         |                                | polynucleotide phosphorylase/polyadenylase    | pnp    | 1213 | 1136      | J          |     |     |               |
| 131 | 1302752           | 1306486 | -                              | putative ABC transporter, ATP-binding protein | -      | 1220 | 1141      | V          |     |     | 3735          |
|     |                   |         |                                | hypothetical protein                          | -      | 1221 | 1142      | I          |     |     |               |
|     |                   |         |                                | D-lactate dehydrogenase                       | dld    | 1222 | 1143      | C          |     |     |               |
| 132 | 1307038           | 1307234 | -                              | uroporphyrinogen-III synthase                 | hemD   | 1224 | 1145      | H          |     |     | 197           |
| 133 | 1310170           | 1311087 | -                              | dinucleoside polyphosphate hydrolase          | mutT   | 1228 | 1149      | LR         |     |     | 918           |
|     |                   |         |                                | aspartate kinase                              | lysC   | 1229 | 1150      | E          |     |     |               |
| 134 | 1324969           | 1325063 | -                              | outer membrane protein-adhesin                | babB   | 0896 | 1164      | -          | hop |     | 95            |
| 135 | 1325416           | 1326846 | -                              | outer membrane protein-adhesin                | babB   | 0896 | 1164      | -          | hop |     | 1431          |
| 136 | 1335980           | 1336391 | -                              | hypothetical protein                          | -      | 1252 | 1173      | E          |     |     | 412           |
|     |                   |         |                                | tryptophanyl-tRNA synthetase                  | trpS   | 1253 | 1174      | J          |     |     |               |
| 137 | 1360346           | 1360473 | -                              | no annotation/ intergenic                     |        |      |           |            |     |     | 128           |
| 138 | 1360679           | 1360818 | -                              | tryptophan synthase subunit alpha             | trpA   | 1277 | 1198      | E          |     |     | 140           |
| 139 | 1361124           | 1361264 | -                              | tryptophan synthase subunit alpha             | trpA   | 1277 | 1198      | E          |     |     | 141           |
| 140 | 1382301           | 1382304 | -                              | 50S ribosomal protein L5                      | rplE   | 1307 | 1227      | J          |     |     | 4             |
| 141 | 1385966           | 1386073 | -                              | 50S ribosomal protein L2                      | rplB   | 1316 | 1236      | J          |     |     | 108           |
| 142 | 1386322           | 1386610 | -                              | 50S ribosomal protein L23                     | rplW   | 1317 | 1237      | J          |     |     | 289           |
|     |                   |         |                                | 50S ribosomal protein L4                      | rplD   | 1318 | 1238      | J          |     |     |               |
| 143 | 1389012           | 1389099 | -                              | hypothetical protein                          | -      | 1321 | 1241      | R          |     |     | 88            |
| 144 | 1390389           | 1390394 | -                              | ribonuclease HII                              | rnhB   | 1323 | 1243      | L          |     |     | 6             |
| 145 | 1396455           | 1396945 | -                              | cation efflux system protein                  | czcA_2 | 1329 | 1249      | P          |     |     | 491           |
| 146 | 1404898           | 1405288 | -                              | hypothetical protein                          | -      | 1337 | 1256      | H          |     |     | 391           |
|     |                   |         |                                | nickel responsive regulator                   | -      | 1338 | 1257      | K          |     |     |               |
| 147 | 1406007           | 1406202 | -                              | biopolymer transport protein                  | exbB_2 | 1339 | 1258      | U          |     |     | 196           |
| 148 | 1406735           | 1407856 | -                              | biopolymer transport EXBD protein             | exbD_2 | 1340 | 1259      | U          |     |     | 1122          |
|     |                   |         |                                | siderophore-mediated iron transport protein   | tonB_2 | 1341 | 1260      | M          |     |     |               |
|     |                   |         |                                | putative outer membrane protein               | -      | 0227 | 0212      | -          | hop |     |               |
| 149 | 1408174           | 1409258 | -                              | putative outer membrane protein               | -      | 0227 | 0212      | -          | hop |     | 1085          |
| 150 | 1409776           | 1409809 | -                              | putative outer membrane protein               | -      | 0227 | 0212      | -          | hop |     | 34            |
| 151 | 1415785           | 1416999 | -                              | hypothetical protein                          | -      | 1349 | 1268      | -          |     |     | 1215          |
|     |                   |         |                                | carboxyl-terminal protease                    | prc    | 1350 | 1269      | M          |     |     |               |
| 152 | 1417494           | 1417824 | -                              | carboxyl-terminal protease                    | prc    | 1350 | 1269      | M          |     |     | 331           |

| No  | Position in NQ367 |         | Corresponding import in NQ1671 | Annotation <sup>a</sup>                                       |  | Gene   | HP-number | jhp-number | COG | OMP      | Import length |
|-----|-------------------|---------|--------------------------------|---------------------------------------------------------------|--|--------|-----------|------------|-----|----------|---------------|
|     | start             | end     |                                | Description                                                   |  |        |           |            |     |          |               |
| 153 | 1418038           | 1418277 | -                              | no annotation/ intergenic                                     |  |        |           |            |     |          | 240           |
| 154 | 1418715           | 1420306 | -                              | hypothetical protein                                          |  | -      | 1351      | 1270       | -   |          | 1592          |
|     |                   |         |                                | type II DNA modification enzyme (methyltransferase)           |  | -      | 1352      | 1271       | L   |          |               |
|     |                   |         |                                | hypothetical protein                                          |  | -      | 1354      | 1272       | R   |          |               |
| 155 | 1420959           | 1421010 | -                              | hypothetical protein                                          |  | -      | 1354      | 1272       | R   |          | 52            |
| 156 | 1421293           | 1422216 | -                              | hypothetical protein                                          |  | -      | 1354      | 1272       | R   |          | 924           |
| 157 | 1434040           | 1434055 | CNP 19                         | putative transcriptional regulator                            |  | -      | 1365      | 1283       | TK  |          | 16            |
| 158 | 1434393           | 1434430 | CNP 20                         | no annotation/ intergenic                                     |  |        |           |            |     |          | 38            |
| 159 | 1442119           | 1444661 | -                              | DNA repair protein (recombination protein N)                  |  | recN   | 1393      | 1434       | L   |          | 2543          |
|     |                   |         |                                | hypothetical protein                                          |  | -      | 1394      | 1433       | G   |          |               |
|     |                   |         |                                | hypothetical protein                                          |  | -      | 1395      | 1432       | -   | hor      |               |
| 160 | 1446949           | 1447717 | -                              | L-alanine dehydrogenase                                       |  | ald    | 1398      | 1428       | E   |          | 769           |
| 161 | 1447967           | 1448266 | -                              | amino acid permease                                           |  | -      | 1017      | 0406       | E   |          | 300           |
| 162 | 1448470           | 1448845 | -                              | amino acid permease                                           |  | -      | 1017      | 0406       | E   |          | 376           |
| 163 | 1456339           | 1459549 | -                              | type I restriction enzyme (restriction subunit)               |  | hsdR_3 | 1402      | 1424       | V   |          | 3211          |
|     |                   |         |                                | type I restriction enzyme (modification subunit)              |  | hsdM_3 | 1403      | 1423       | V   |          |               |
| 164 | 1465978           | 1466118 | -                              | chromosomal replication initiation protein                    |  | dnaA   | 1529      | 1417       | L   |          | 141           |
| 165 | 1468776           | 1468987 | CNP 22                         | exodeoxyribonuclease III                                      |  | exoA   | 1526      | 1415       | L   |          | 212           |
| 166 | 1485283           | 1487636 | -                              | putative iron-regulated outer membrane protein                |  | frpB_3 | 1512      | 1405       | P   | family 4 | 2354          |
| 167 | 1536937           | 1537102 | -                              | hypothetical protein                                          |  | -      | 1464      | 1357       | Q   |          | 166           |
| 168 | 1596264           | 1596339 | -                              | no annotation/ intergenic                                     |  |        |           |            |     |          | 76            |
| 169 | 1601621           | 1602000 | -                              | putative type III DNA modification enzyme (methyltransferase) |  | mod_1  |           | 1296       | L   |          | 380           |
| 170 | 1615236           | 1619177 | -                              | type III restriction enzyme R protein                         |  | -      | 1371      | 1285       | -   |          | 3942          |
|     |                   |         |                                | type II DNA modification enzyme (methyltransferase)           |  | -      |           | 1284       | L   |          |               |

<sup>a</sup> Annotation is based on an automatic annotation, generated with the Kodon software using the J99 annotation as a reference. The annotation of predicted ORFs with no homologue in J99 was done manually by means of BLAST searches. COG classifications are primarily based on J99 as of May 2010.

**Table S12: Mean estimates and 95% credibility intervals from the Bayesian analyses of the paired *H. pylori* isolates obtained sequentially during chronic infection.**

|                                                     | NQ315/<br>NQ1712       | NQ352/<br>NQ1701    | NQ392/<br>NQ1707         | NQ392/<br>NQ4060       | NQ367/<br>NQ1671       | NQ367/<br>NQ4191     |
|-----------------------------------------------------|------------------------|---------------------|--------------------------|------------------------|------------------------|----------------------|
| <b>Length of imports (bp)</b>                       | 402 [327;496]          | 629 [571;699]       | 283 [150;468]            | 286 [207;398]          | 261 [176;375]          | 519 [440;610]        |
| <b>Length of groups of imports (bp)</b>             | 3362<br>[2561;4291]    | 3686<br>[3179;4250] | 7922<br>[1977;18176]     | 10088<br>[4772;20469]  | 2599<br>[1460;4663]    | 3359<br>[2556;4359]  |
| <b>Number of imports per group</b>                  | 2.41 [2.27;2.58]       | 2.45 [2.35;2.55]    | 2.6 [2.1;3.6]            | 3.1 [2.6;4.0]          | 2.54 [2.23;2.97]       | 2.69 [2.51;2.91]     |
| <b>Distance between two imports in a group (bp)</b> | 700<br>[504;916]       | 621<br>[504;770]    | 1933<br>[391;4289]       | 2207<br>[1045;4217]    | 542<br>[267;1020]      | 531<br>[367;761]     |
| <b>Distance between two groups of imports (bp)</b>  | 19438<br>[14374;27048] | 3157<br>[2598;3801] | 134916<br>[47060;293286] | 30973<br>[15633;49392] | 72170<br>[40906;12480] | 8469<br>[6449;10646] |
| <b>Mutation rate <sup>a</sup></b>                   | 2.4 [1.9;2.9]          | 6.5 [5.3;7.5]       | 0.5 [0.3;0.7]            | 0.5 [0.4;0.6]          | 0.7 [0.5;1.0]          | 0.7 [0.6;0.8]        |
| <b>Import rate <sup>b</sup></b>                     | 4.0 [3.0;5.8]          | 16.5 [14.0;19.0]    | 0.5 [0.2;1.2]            | 0.2 [0.1;0.3]          | 1.0 [0.4;1.8]          | 1.0 [0.8;1.1]        |
| <b>Ratio of rates of imports and mutations</b>      | 1.7 [1.1;2.6]          | 2.5 [2.0;3.2]       | 1.2 [0.4;3.0]            | 0.4 [0.2;0.6]          | 1.4 [0.5;2.7]          | 1.5 [1.1;2.0]        |
| <b>Ratio of effects of imports and mutations</b>    | 26.7 [15.9;41.0]       | 62.0 [47.5;78.0]    | 12.4 [3.5;35.0]          | 4.3 [2.2;7.4]          | 13.7 [5.2;28.3]        | 29.5 [20.7;39.6]     |

<sup>a</sup> (per site, per year,  $\times 10^{-5}$ )

<sup>b</sup> (per initiation site, per year,  $\times 10^{-5}$ )

Table S13: Frequency of imports /CNPs within different functional gene categories

|                                                               |   | No. of genes in J99 | combined length of genes in category (kb) | No. of genes affected in NQ315/ NQ1712 | % of genes affected by imports in NQ315/ NQ1712 | Fisher's exact test P-value | No. of genes affected in NQ352/ NQ1701 | % of genes affected by imports in NQ352/ NQ1701 | Fisher's exact test P-value |
|---------------------------------------------------------------|---|---------------------|-------------------------------------------|----------------------------------------|-------------------------------------------------|-----------------------------|----------------------------------------|-------------------------------------------------|-----------------------------|
| Information storage and processing                            |   | 241                 | 262.864                                   | 17                                     | 7.05                                            | 0.958                       | 100                                    | 41.49                                           | 0.544                       |
| Translation, ribosomal structure and biogenesis               | J | 121                 | 102.705                                   | 6                                      | 4.96                                            | 0.985                       | 47                                     | 38.84                                           | 0.770                       |
| Transcription                                                 | K | 35                  | 47.313                                    | 5                                      | 14.29                                           | 0.255                       | 15                                     | 42.86                                           | 0.506                       |
| Replication, recombination and repair                         | L | 85                  | 112.846                                   | 6                                      | 7.06                                            | 0.858                       | 38                                     | 44.71                                           | 0.314                       |
| Cellular processes and signalling                             |   | 344                 | 417.178                                   | 39                                     | 11.34                                           | 0.166                       | 161                                    | 46.80                                           | <b>0.017</b>                |
| Cell cycle control, cell division, chromosome partitioning    | D | 23                  | 24.042                                    | 4                                      | 17.39                                           | 0.183                       | 7                                      | 30.43                                           | 0.907                       |
| Defense mechanisms                                            | V | 25                  | 41.565                                    | 3                                      | 12.00                                           | 0.451                       | 12                                     | 48.00                                           | 0.324                       |
| Signal transduction mechanisms                                | T | 27                  | 30.753                                    | 3                                      | 11.11                                           | 0.503                       | 15                                     | 55.56                                           | 0.100                       |
| Cell wall/ membrane/ envelope biogenesis                      | M | 97                  | 111.006                                   | 15                                     | 15.46                                           | 0.046                       | 47                                     | 48.45                                           | 0.097                       |
| Cell motility                                                 | N | 49                  | 76.56                                     | 3                                      | 6.12                                            | 0.875                       | 29                                     | 59.18                                           | <b>0.009</b>                |
| Intracellular Trafficking, secretion, and vesicular transport | U | 59                  | 66.967                                    | 2                                      | 3.39                                            | 0.985                       | 16                                     | 27.12                                           | 0.994                       |
| Posttranslational modification, protein turnover, chaperones  | O | 64                  | 66.285                                    | 9                                      | 14.06                                           | 0.168                       | 35                                     | 54.69                                           | <b>0.022</b>                |
| Metabolism                                                    |   | 414                 | 397.179                                   | 34                                     | 8.21                                            | 0.915                       | 192                                    | 46.38                                           | <b>0.014</b>                |
| Energy production and conversion                              | C | 69                  | 74.643                                    | 2                                      | 2.90                                            | 0.994                       | 39                                     | 56.52                                           | <b>0.008</b>                |
| Carbohydrate transport and metabolism                         | G | 39                  | 41.499                                    | 5                                      | 12.82                                           | 0.335                       | 15                                     | 38.46                                           | 0.713                       |
| Amino acid transport and metabolism                           | E | 89                  | 102.735                                   | 5                                      | 5.62                                            | 0.949                       | 42                                     | 47.19                                           | 0.162                       |
| Nucleotide transport and metabolism                           | F | 38                  | 38.820                                    | 2                                      | 5.26                                            | 0.901                       | 18                                     | 47.37                                           | 0.286                       |
| Coenzyme transport and metabolism                             | H | 75                  | 65.046                                    | 7                                      | 9.33                                            | 0.616                       | 32                                     | 42.67                                           | 0.470                       |
| Lipid transport and metabolism                                | I | 40                  | 34.686                                    | 2                                      | 5.00                                            | 0.917                       | 18                                     | 45.00                                           | 0.388                       |
| Inorganic ion transport and metabolism                        | P | 53                  | 67.458                                    | 10                                     | 18.87                                           | 0.029                       | 27                                     | 50.94                                           | 0.105                       |
| Secondary metabolites biosynthesis, transport and catabolism  | Q | 11                  | 11.112                                    | 1                                      | 9.09                                            | 0.680                       | 1                                      | 9.09                                            | 0.997                       |
| Poorly characterized                                          |   | 187                 | 171.912                                   | 14                                     | 7.49                                            | 0.901                       | 63                                     | 33.69                                           | 0.993                       |
| General function prediction only                              | R | 117                 | 112.485                                   | 9                                      | 7.69                                            | 0.831                       | 35                                     | 29.91                                           | 0.998                       |
| Function unknown                                              | S | 70                  | 59.427                                    | 5                                      | 7.14                                            | 0.835                       | 28                                     | 40.00                                           | 0.655                       |
| No category                                                   | - | 392                 | 302.798                                   | 37                                     | 9.44                                            | 0.644                       | 140                                    | 35.71                                           | 0.997                       |
| Outer membrane proteins                                       |   | 63                  | 95.283                                    | 20                                     | 31.75                                           | <b>0.000</b>                | 27                                     | 42.86                                           | 0.468                       |
| family 1 (hop and hor)                                        |   | 32                  | 44.949                                    | 11                                     | 34.38                                           | <b>0.000</b>                | 17                                     | 53.13                                           | 0.125                       |
| hop                                                           |   | 20                  | 35.628                                    | 10                                     | 50.00                                           | <b>0.000</b>                | 13                                     | 65.00                                           | <b>0.029</b>                |
| hor                                                           |   | 12                  | 9.321                                     | 1                                      | 8.33                                            | 0.712                       | 4                                      | 33.33                                           | 0.808                       |
| hof - family 2                                                |   | 8                   | 11.571                                    | 4                                      | 50.00                                           | <b>0.005</b>                | 4                                      | 50.00                                           | 0.444                       |
| hom - family 3                                                |   | 4                   | 8.472                                     | 0                                      | 0.00                                            | 1.000                       | 2                                      | 50.00                                           | 0.553                       |
| family 4                                                      |   | 6                   | 14.673                                    | 2                                      | 33.33                                           | 0.110                       | 2                                      | 33.33                                           | 0.792                       |
| family 5                                                      |   | 3                   | 3.969                                     | 1                                      | 33.33                                           | 0.267                       | 1                                      | 33.33                                           | 0.801                       |
| other                                                         |   | 10                  | 11.649                                    | 2                                      | 20.00                                           | 0.256                       | 1                                      | 10.00                                           | 0.995                       |

|                                                               |   | No. of genes in J99 | combined length of genes in category (bp) | No. of genes affected in NQ392/ NQ1707 | % of genes affected by imports in NQ392/ NQ1707 | Fisher's exact test P-value | No. of genes affected in NQ392/ NQ4060 | % of genes affected by imports in NQ392/ NQ4060 | Fisher's exact test P-value |
|---------------------------------------------------------------|---|---------------------|-------------------------------------------|----------------------------------------|-------------------------------------------------|-----------------------------|----------------------------------------|-------------------------------------------------|-----------------------------|
| Information storage and processing                            |   | 241                 | 262.864                                   | 0                                      | 0.00                                            | 1.000                       | 5                                      | 2.07                                            | 0.880                       |
| Translation, ribosomal structure and biogenesis               | J | 121                 | 102.705                                   | 0                                      | 0.00                                            | 1.000                       | 3                                      | 2.48                                            | 0.728                       |
| Transcription                                                 | K | 35                  | 47.313                                    | 0                                      | 0.00                                            | 1.000                       | 2                                      | 5.71                                            | 0.289                       |
| Replication, recombination and repair                         | L | 85                  | 112.846                                   | 0                                      | 0.00                                            | 1.000                       | 0                                      | 0.00                                            | 1.000                       |
| Cellular processes and signalling                             |   | 344                 | 417.178                                   | 5                                      | 1.45                                            | 0.275                       | 11                                     | 3.20                                            | 0.484                       |
| Cell cycle control, cell division, chromosome partitioning    | D | 23                  | 24.042                                    | 0                                      | 0.00                                            | 1.000                       | 0                                      | 0.00                                            | 1.000                       |
| Defense mechanisms                                            | V | 25                  | 41.565                                    | 2                                      | 8.00                                            | <b>0.026</b>                | 5                                      | 20.00                                           | <b>0.001</b>                |
| Signal transduction mechanisms                                | T | 27                  | 30.753                                    | 0                                      | 0.00                                            | 1.000                       | 1                                      | 3.70                                            | 0.569                       |
| Cell wall/ membrane/ envelope biogenesis                      | M | 97                  | 111.006                                   | 2                                      | 2.06                                            | 0.266                       | 3                                      | 3.09                                            | 0.577                       |
| Cell motility                                                 | N | 49                  | 76.560                                    | 0                                      | 0.00                                            | 1.000                       | 1                                      | 2.04                                            | 0.785                       |
| Intracellular Trafficking, secretion, and vesicular transport | U | 59                  | 66.967                                    | 1                                      | 1.69                                            | 0.465                       | 0                                      | 0.00                                            | 1.000                       |
| Posttranslational modification, protein turnover, chaperones  | O | 64                  | 66.285                                    | 0                                      | 0.00                                            | 1.000                       | 1                                      | 1.56                                            | 0.867                       |
| Metabolism                                                    |   | 414                 | 397.179                                   | 4                                      | 0.97                                            | 0.656                       | 7                                      | 1.69                                            | 0.983                       |
| Energy production and conversion                              | C | 69                  | 74.643                                    | 1                                      | 1.45                                            | 0.520                       | 0                                      | 0.00                                            | 1.000                       |
| Carbohydrate transport and metabolism                         | G | 39                  | 41.499                                    | 0                                      | 0.00                                            | 1.000                       | 0                                      | 0.00                                            | 1.000                       |
| Amino acid transport and metabolism                           | E | 89                  | 102.735                                   | 1                                      | 1.12                                            | 0.614                       | 3                                      | 3.37                                            | 0.517                       |
| Nucleotide transport and metabolism                           | F | 38                  | 38.820                                    | 0                                      | 0.00                                            | 1.000                       | 0                                      | 0.00                                            | 1.000                       |
| Coenzyme transport and metabolism                             | H | 75                  | 65.046                                    | 0                                      | 0.00                                            | 1.000                       | 0                                      | 0.00                                            | 1.000                       |
| Lipid transport and metabolism                                | I | 40                  | 34.686                                    | 0                                      | 0.00                                            | 1.000                       | 1                                      | 2.50                                            | 0.714                       |
| Inorganic ion transport and metabolism                        | P | 53                  | 67.458                                    | 2                                      | 3.77                                            | 0.102                       | 3                                      | 5.66                                            | 0.217                       |
| Secondary metabolites biosynthesis, transport and catabolism  | Q | 11                  | 11.112                                    | 0                                      | 0.00                                            | 1.000                       | 0                                      | 0.00                                            | 1.000                       |
| Poorly characterized                                          |   | 187                 | 171.912                                   | 1                                      | 0.53                                            | 0.874                       | 5                                      | 2.67                                            | 0.691                       |
| General function prediction only                              | R | 117                 | 112.485                                   | 1                                      | 0.85                                            | 0.717                       | 3                                      | 2.56                                            | 0.706                       |
| Function unknown                                              | S | 70                  | 59.427                                    | 0                                      | 0.00                                            | 1.000                       | 2                                      | 2.86                                            | 0.639                       |
| No category                                                   |   | 392                 | 302.798                                   | 4                                      | 1.02                                            | 0.607                       | 13                                     | 3.32                                            | 0.415                       |
| Outer membrane proteins                                       |   | 63                  | 95.283                                    | 3                                      | 4.76                                            | <b>0.025</b>                | 9                                      | 14.29                                           | <b>0.000</b>                |
| family 1 (hop and hor)                                        |   | 32                  | 44.949                                    | 2                                      | 6.25                                            | <b>0.042</b>                | 7                                      | 21.88                                           | <b>0.000</b>                |
| hop                                                           |   | 20                  | 35.628                                    | 2                                      | 10.00                                           | <b>0.017</b>                | 7                                      | 35.00                                           | <b>0.000</b>                |
| hor                                                           |   | 12                  | 9.321                                     | 0                                      | 0.00                                            | 1.000                       | 0                                      | 0.00                                            | 1.000                       |
| hof - family 2                                                |   | 8                   | 11.571                                    | 0                                      | 0.00                                            | 1.000                       | 0                                      | 0.00                                            | 1.000                       |
| hom - family 3                                                |   | 4                   | 8.472                                     | 0                                      | 0.00                                            | 1.000                       | 0                                      | 0.00                                            | 1.000                       |
| family 4                                                      |   | 6                   | 14.673                                    | 1                                      | 16.67                                           | 0.061                       | 1                                      | 16.67                                           | 0.170                       |
| family 5                                                      |   | 3                   | 3.969                                     | 0                                      | 0.00                                            | 1.000                       | 0                                      | 0.00                                            | 1.000                       |
| other                                                         |   | 10                  | 11.649                                    | 0                                      | 0.00                                            | 1.000                       | 1                                      | 10.00                                           | 0.267                       |

|                                                               |   | No. of genes in J99 | combined length of genes in category (bp) | No. of genes affected in NQ367/ NQ1671 | % of genes affected by imports in NQ367/ NQ1671 | Fisher's exact test P-value | No. of genes affected in NQ367/ NQ4191 | % of genes affected by imports in NQ367/ NQ4191 | Fisher's exact test P-value |
|---------------------------------------------------------------|---|---------------------|-------------------------------------------|----------------------------------------|-------------------------------------------------|-----------------------------|----------------------------------------|-------------------------------------------------|-----------------------------|
| Information storage and processing                            |   | 241                 | 262.864                                   | 10                                     | 4.15                                            | <b>0.020</b>                | 40                                     | 16.60                                           | 0.114                       |
| Translation, ribosomal structure and biogenesis               | J | 121                 | 102.705                                   | 3                                      | 2.48                                            | 0.464                       | 15                                     | 12.40                                           | 0.730                       |
| Transcription                                                 | K | 35                  | 47.313                                    | 2                                      | 5.71                                            | 0.162                       | 4                                      | 11.43                                           | 0.739                       |
| Replication, recombination and repair                         | L | 85                  | 112.846                                   | 5                                      | 5.88                                            | <b>0.028</b>                | 21                                     | 24.71                                           | <b>0.004</b>                |
| Cellular processes and signalling                             |   | 344                 | 417.178                                   | 4                                      | 1.16                                            | 0.948                       | 51                                     | 14.83                                           | 0.314                       |
| Cell cycle control, cell division, chromosome partitioning    | D | 23                  | 24.042                                    | 0                                      | 0.00                                            | 1.000                       | 3                                      | 13.04                                           | 0.640                       |
| Defense mechanisms                                            | V | 25                  | 41.565                                    | 1                                      | 4.00                                            | 0.410                       | 10                                     | 40.00                                           | <b>0.001</b>                |
| Signal transduction mechanisms                                | T | 27                  | 30.753                                    | 1                                      | 3.70                                            | 0.434                       | 5                                      | 18.52                                           | 0.318                       |
| Cell wall/ membrane/ envelope biogenesis                      | M | 97                  | 111.006                                   | 1                                      | 1.03                                            | 0.877                       | 14                                     | 14.43                                           | 0.484                       |
| Cell motility                                                 | N | 49                  | 76.560                                    | 0                                      | 0.00                                            | 1.000                       | 7                                      | 14.29                                           | 0.532                       |
| Intracellular Trafficking, secretion, and vesicular transport | U | 59                  | 66.967                                    | 1                                      | 1.69                                            | 0.716                       | 8                                      | 13.56                                           | 0.589                       |
| Posttranslational modification, protein turnover, chaperones  | O | 64                  | 66.285                                    | 0                                      | 0.00                                            | 1.000                       | 4                                      | 6.25                                            | 0.985                       |
| Metabolism                                                    |   | 414                 | 397.179                                   | 6                                      | 1.45                                            | 0.894                       | 55                                     | 13.29                                           | 0.688                       |
| Energy production and conversion                              | C | 69                  | 74.643                                    | 2                                      | 2.90                                            | 0.423                       | 12                                     | 17.39                                           | 0.242                       |
| Carbohydrate transport and metabolism                         | G | 39                  | 41.499                                    | 0                                      | 0.00                                            | 1.000                       | 5                                      | 12.82                                           | 0.649                       |
| Amino acid transport and metabolism                           | E | 89                  | 102.735                                   | 1                                      | 1.12                                            | 0.853                       | 17                                     | 19.10                                           | 0.100                       |
| Nucleotide transport and metabolism                           | F | 38                  | 38.820                                    | 0                                      | 0.00                                            | 1.000                       | 4                                      | 10.53                                           | 0.796                       |
| Coenzyme transport and metabolism                             | H | 75                  | 65.046                                    | 1                                      | 1.33                                            | 0.800                       | 6                                      | 8.00                                            | 0.962                       |
| Lipid transport and metabolism                                | I | 40                  | 34.686                                    | 0                                      | 0.00                                            | 1.000                       | 3                                      | 7.50                                            | 0.932                       |
| Inorganic ion transport and metabolism                        | P | 53                  | 67.458                                    | 2                                      | 3.77                                            | 0.301                       | 6                                      | 11.32                                           | 0.768                       |
| Secondary metabolites biosynthesis, transport and catabolism  | Q | 11                  | 11.112                                    | 0                                      | 0.00                                            | 1.000                       | 2                                      | 18.18                                           | 0.465                       |
| Poorly characterized                                          |   | 187                 | 171.912                                   | 2                                      | 1.07                                            | 0.914                       | 23                                     | 12.30                                           | 0.780                       |
| General function prediction only                              | R | 117                 | 112.485                                   | 1                                      | 0.85                                            | 0.921                       | 17                                     | 14.53                                           | 0.462                       |
| Function unknown                                              | S | 70                  | 59.427                                    | 1                                      | 1.43                                            | 0.776                       | 6                                      | 8.57                                            | 0.940                       |
| No category                                                   | - | 392                 | 302.798                                   | 8                                      | 2.04                                            | 0.587                       | 42                                     | 10.71                                           | 0.987                       |
| Outer membrane proteins                                       |   | 63                  | 95.283                                    | 4                                      | 6.35                                            | <b>0.039</b>                | 17                                     | 26.98                                           | <b>0.004</b>                |
| family 1 (hop and hor)                                        |   | 32                  | 44.949                                    | 3                                      | 9.38                                            | <b>0.027</b>                | 9                                      | 28.13                                           | <b>0.025</b>                |
| hop                                                           |   | 20                  | 35.628                                    | 2                                      | 10.00                                           | 0.063                       | 7                                      | 35.00                                           | <b>0.014</b>                |
| hor                                                           |   | 12                  | 9.321                                     | 1                                      | 8.33                                            | 0.223                       | 2                                      | 16.67                                           | 0.513                       |
| hof - family 2                                                |   | 8                   | 11.571                                    | 0                                      | 0.00                                            | 1.000                       | 4                                      | 50.00                                           | <b>0.016</b>                |
| hom - family 3                                                |   | 4                   | 8.472                                     | 0                                      | 0.00                                            | 1.000                       | 0                                      | 0.00                                            | 1.000                       |
| family 4                                                      |   | 6                   | 14.673                                    | 0                                      | 0.00                                            | 1.000                       | 2                                      | 33.33                                           | 0.198                       |
| family 5                                                      |   | 3                   | 3.969                                     | 1                                      | 33.33                                           | 0.061                       | 0                                      | 0.00                                            | 1.000                       |
| other                                                         |   | 10                  | 11.649                                    | 0                                      | 0.00                                            | 1.000                       | 2                                      | 20.00                                           | 0.415                       |

**Table S14: Positions with intra-isolate sequence heterogeneity in NQ392 and NQ1707 (see Materials and Methods for details)**

**A Heterogeneity in NQ392**

| No | Position in NQ392 |         | Contigs <sup>b</sup> | Number of polymorphic sites | Variant present in other isolates <sup>c</sup> | Annotation <sup>a</sup>                                      |        |           |            |
|----|-------------------|---------|----------------------|-----------------------------|------------------------------------------------|--------------------------------------------------------------|--------|-----------|------------|
|    | start             | end     |                      |                             |                                                | Description                                                  | gene   | HP-number | jhp-number |
| 1  | 9468              | 9640    | 68 and 73            | 6                           | no                                             | putative                                                     |        | 1524      | 1413       |
| 2  | 431720            | 432681  | 63 and 78            | 106                         | partially, SNP_X_1, X_2 and X_3 (3/106)        | outer membrane protein-adhesin                               | babA   | 1243      | 0833       |
| 3  | 847766            | 847913  | 32 and 22            | 9                           | CNP_X_1 (9/9)                                  | putative outer membrane protein                              |        | 0726      | 0663       |
| 4  | 913066            | 913150  | 57 and 54            | 2                           | CNP_X_2 (2/2)                                  | type I restriction enzyme (specificity subunit)              | hsdS_4 |           | 0726       |
| 5  | 913183            | 913273  | 57 and 54            | 5                           | corresponding variability in NQ1707            | type I restriction enzyme (specificity subunit)              | hsdS_4 |           | 0726       |
| 6  | 913281            | 913388  | 47 and 77            | 14                          | partially, CNP_X_3 (10/14)                     | type I restriction enzyme (specificity subunit)              | hsdS_4 |           | 0726       |
| 7  | 913781            | 913936  | 4 and 5              | 8                           | CNP_X_4 (8/8)                                  | anti-codon nuclease masking agent (prfB)                     |        | 0790      |            |
| 8  | 933182            | 933632  | 75 and 70            | 36                          | no                                             | putative                                                     |        | 0812      | 0748       |
| 9  | 967799            | 968370  | 74 and 60            | 46                          | no                                             | type I restriction enzyme (modification subunit)             | hsdM_2 | 0850      | 0786       |
| 10 | 1246422           | 1246696 | 53 and 35            | 34                          | CNP_X_5 (34/34)                                | intergenic                                                   |        |           |            |
| 11 | 1650240           | 1651165 | 49 and 14            | 71                          | partially, CNP_X_6 (6/71)                      | putative type II DNA modification enzyme (methyltransferase) |        |           | 1409       |

**B Heterogeneity in NQ1707**

| No | Position in NQ392   |                     | Contigs <sup>b</sup> | Number of polymorphic sites | Variant present in other isolates <sup>c</sup> | Annotation <sup>a</sup>                                                |          |           |            |
|----|---------------------|---------------------|----------------------|-----------------------------|------------------------------------------------|------------------------------------------------------------------------|----------|-----------|------------|
|    | start               | end                 |                      |                             |                                                | Description                                                            | gene     | HP-number | jhp-number |
| 1  | 99583               | 99956               | 58 and 57            | 23                          | no                                             | carbonic anhydrase                                                     | icfA     | 0004      | 0004       |
| 2  | 266915              | 267129              | 34 and 86            | 21                          | no                                             | putative                                                               |          | 0168      | 0154       |
| 3  | 335622              | 335904              | 51 and 52            | 16                          | no                                             | 3-deoxy-manno-octulosonate cytidyltransferase                          | kdsB     | 0230      | 0215       |
| 4  | 721820              | 722174              | 32 and 69            | 11                          | no                                             | DNA-ligase                                                             | lig      | 0615      | 0558       |
| 5  | 913183              | 913273              | 95 and 66            | 6                           | corresponding variability in NQ392             | typeI restriction enzyme (specificity subunit)                         | hsdS_4   |           | 0726       |
| 6  | 913450              | 913552              | 19 and 66            | 5                           | partially, SNP_X_4 (1/5)                       | anti-codon nuclease masking agent (prrB)                               |          | 0790      |            |
| 7  | 974494              | 974653              | 76 and 90            | 16                          | no                                             | phosphoheptose isomerase                                               | gmhA     | 0857      | 0791       |
| 8  | 1621733             | 1621835             | 84 and 21            | 12                          | no                                             | putative                                                               |          | 1490      | 1383       |
| 9  | 102594              | 102984              | 50 and 100           | 31                          | no                                             | putative outer membrane protein                                        |          | 0009      | 0007       |
| 10 | 88600               | 89056               | 102 and 65           | 21                          | no                                             | putative undecaprenyl-phosphate-alpha-N-acetylglucosaminyltransferaseE | wecA     | 1581      | 1488       |
| 11 | 87542               | 88742               | 102 and 94           | 72                          | no                                             | putative                                                               |          | 1579      | 1486       |
|    |                     |                     |                      |                             |                                                | putative                                                               |          | 1580      | 1487       |
|    |                     |                     |                      |                             |                                                | putative undecaprenyl-phosphate-alpha-N-acetylglucosaminyltransferaseE | wecA     | 1581      | 1488       |
| 12 | in NQ1707<br>622412 | in NQ1707<br>622526 | 33 and 74            | 5                           | no                                             | cag island protein                                                     | orf13/14 | 0527      | 0476       |
| 13 | in NQ1707<br>622139 | in NQ1707<br>622250 | 33 and 72            | 4                           | no                                             | cag island protein                                                     | orf13/14 | 0527      | 0476       |



**C Variability with variants present in other isolates**

| No      | Position in NQ392 |         | Variant present in isolate: |        |        | Annotation <sup>a</sup>                                      |        |           |            |
|---------|-------------------|---------|-----------------------------|--------|--------|--------------------------------------------------------------|--------|-----------|------------|
|         | start             | end     | NQ392                       | NQ1707 | NQ4060 | Description                                                  | gene   | HP-number | jhp-number |
| SNP_X_1 | 431720            |         | A/B                         | A      | B      | outer membrane protein-adhesin                               | babA   | 1243      | 0833       |
| SNP_X_2 | 432168            |         | A/B                         | A      | B      | outer membrane protein-adhesin                               | babA   | 1243      | 0833       |
| SNP_X_3 | 432460            |         | A/B                         | A      | B      | outer membrane protein-adhesin                               | babA   | 1243      | 0833       |
| CNP_X_1 | 847766            | 847913  | A/B                         | B      | A      | putative outer membrane protein                              |        | 0726      | 0663       |
| CNP_X_2 | 913066            | 913150  | A/B                         | B      | A      | type I restriction enzyme (specificity subunit)              | hsdS_4 |           | 0726       |
| CNP_X_3 | 913281            | 913305  | A/B                         | A      | B      | type I restriction enzyme (specificity subunit)              | hsdS_4 |           | 0726       |
| SNP_X_4 | 913450            |         | A                           | A/B    | B      | anti-codon nuclease masking agent (prB)                      |        | 0790      |            |
| CNP_X_4 | 913781            | 913936  | A/B                         | B      | A      | anti-codon nuclease masking agent (prB)                      |        | 0790      |            |
| CNP_X_5 | 1246422           | 1246696 | A/B                         | A      | B      | intergenic                                                   |        |           |            |
| CNP_X_6 | 1650912           | 1651162 | A/B                         | B      | A      | putative type II DNA modification enzyme (methyltransferase) |        |           | 1409       |

<sup>a</sup> Annotation is based on an automatic annotation, generated with the Kodon software using the J99 annotation as a reference. The annotation of predicted ORFs with no homologue in J99 was done manually by means of BLAST searches.

<sup>b</sup> Italics indicate contigs used for the virtual genomes

<sup>c</sup> Correspondence of heterogeneity in other isolates is described in more detail in part C

**Table S15 a: Differences in strain pair NQ315/1712 not categorized as SNPs or CNPs**

| No | Position in NQ315 |         | type of difference                                         | sequence                                                                                         | gene affected by difference                                 |      | HP-number | jhp-number | COG | comment                                   |
|----|-------------------|---------|------------------------------------------------------------|--------------------------------------------------------------------------------------------------|-------------------------------------------------------------|------|-----------|------------|-----|-------------------------------------------|
|    | start             | end     |                                                            |                                                                                                  |                                                             |      |           |            |     |                                           |
| 1  | 232464            | 232479  | difference in 2nt repeat<br>8 X in NQ315<br>9 X in NQ1712  | ct                                                                                               | putative lipopolysaccharide biosynthesis protein            | rfaJ | 0208      | 0194       |     | phase variation<br>NQ315 ON<br>NQ1712 OFF |
| 2  | 456503            | 456619  | 117nt indel in NQ1712                                      | aaaatagccc cacacaaagg<br>ggcgaaaaaa tagcccaaca<br>agcatttttt aatgaattgc<br>aactctttgt tttggtggat | putative                                                    |      | 1015      | 0408       | -   |                                           |
|    |                   |         |                                                            | gtggataatg tttttcaaaa<br>aaaatcttta tttaaaa                                                      | putative short chain dehydrogenase                          |      | 1014      | 0409       | IQR |                                           |
| 3  | 526346            | 561870  | loss of cagPAI                                             |                                                                                                  |                                                             |      |           |            |     |                                           |
| 4  | 955124            | 955126  | 2 additional contigs in NQ1712                             |                                                                                                  | outer membrane protein - adhesin                            | babA | 1243      | 0833       | -   |                                           |
| 5  | 1022600           | 1022656 | difference in 19nt repeat<br>3 X in NQ315<br>4 X in NQ1712 | aaaatttaga gtttgaaag                                                                             | no annotation/ intergenic                                   |      |           |            |     |                                           |
| 6  | 1317764           | 1317827 | difference in 8nt repeat<br>8 X in NQ315<br>10 X in NQ1712 | ttatgtat                                                                                         | no annotation/ intergenic                                   |      |           |            |     |                                           |
| 7  | 1394038           | 1394057 | difference in 2nt repeat<br>10 X in NQ315<br>9 X in NQ1712 | ga                                                                                               | hypothetical protein                                        |      | 1417      | 1312       |     |                                           |
| 8  | 1412552           | 1412563 | difference in 6nt repeat<br>2 X in NQ315<br>4 X in NQ1712  | aagtct                                                                                           | no annotation/ intergenic                                   |      |           |            |     |                                           |
| 9  | 1414357           | 1414359 | 2 additional contigs in NQ1712                             | position in NQ1712V:<br>1568115 - 1570317                                                        | (BLAST: hypothetical protein HP9810_898g1[H. pylori 98-10]) |      |           |            |     |                                           |
| 10 | 1460004           | 1460021 | difference in 9nt repeat<br>2 X in NQ315<br>4 X in NQ1712  | aaaacaatg                                                                                        | putative                                                    | -    | 1527      | 1416       | -   |                                           |
| 11 | 1528236           | 1528325 | difference in 18nt repeat<br>5 X in NQ315<br>2 X in NQ1712 | cctatattag atagcgtg                                                                              | DNA polymerase I                                            | polA | 1470      | 1363       | L   |                                           |

**Table S15 b: Differences in strain pair NQ352/1701 not categorized as SNPs or CNPs**

| No | Position in NQ352 |         | type of difference                                         | sequence                                | gene affected by difference                       |                  |              |              |        | comment |
|----|-------------------|---------|------------------------------------------------------------|-----------------------------------------|---------------------------------------------------|------------------|--------------|--------------|--------|---------|
|    | start             | end     |                                                            |                                         |                                                   | HP-number        | jhp-number   | COG          |        |         |
| 1  | 124571            | 124648  | difference in 12nt repeat<br>6 X in NQ352<br>4 X in NQ1701 | gagattaaaa aa                           | no annotation/ intergenic                         |                  |              |              |        |         |
| 2  | 223721            | 223768  | difference in 12nt repeat<br>4 X in NQ352<br>3 X in NQ1701 | ctgtattttc tt                           | putative                                          |                  | 0167         | 0153         | -      |         |
| 3  | 413843            | 413876  | difference in 10nt repeat<br>3 X in NQ352<br>2 X in NQ1701 | gtgggttttc                              | septum formation protein                          | ftsK             | 1090         | 0335         | D      |         |
| 4  | 495338            | 495403  | difference in 33nt repeat<br>2 X in NQ352<br>1 X in NQ1701 | ttcatcaaaa gaaaccaaag<br>cgcaaaaatc cgc | type I restriction enzyme<br>modification subunit | hsdM_1           | 0463         | 0415         | V      |         |
| 5  | 572684            | 572737  | difference in 18nt repeat<br>3 X in NQ352<br>2 X in NQ1701 | ttcttgatac tcattatt                     | cag island protein                                | orf13/14<br>cagY | 0527         | 0476         | U      |         |
| 6  | 733421            | 733429  | difference in 9nt repeat<br>1X in NQ352<br>2X in NQ1701    | gctttataa                               | no annotation / intergenic                        |                  |              |              |        |         |
| 7  | 951712            | 951741  | difference in 13nt repeat<br>2 X in NQ352<br>1X in NQ1701  | aaagaaaagg gagtt                        | no annotation/ intergenic                         |                  |              |              |        |         |
| 8  | 969921            | 969939  | 18nt indel                                                 | tagattttag actctagct                    | no annotation/ intergenic                         |                  |              |              |        |         |
| 9  | 1056588           | 1056589 | 3nt indel                                                  | aaa                                     | comB9 like competence protein                     | HPG27_<br>966    |              |              |        |         |
| 10 | 1093596           | 1093637 | difference in 21nt repeat<br>2 X in NQ352<br>1X in NQ1701  | tctcaaacca atgaaagccc<br>c              | putative                                          | -                | 0398         | 0983         | -      |         |
| 11 | 1233888           | 1234680 | additional conitg in NQ352                                 |                                         | sugar efflux transporter<br>carbonic anhydrase    | -<br>-           | 1185<br>1186 | 1111<br>1112 | G<br>P |         |

| No | Position in NQ352 |         | type of difference                                         | sequence                                                                           | gene affected by difference                                     |                                                             |            |      |   | comment |
|----|-------------------|---------|------------------------------------------------------------|------------------------------------------------------------------------------------|-----------------------------------------------------------------|-------------------------------------------------------------|------------|------|---|---------|
|    | start             | end     |                                                            |                                                                                    |                                                                 | HP-number                                                   | jhp-number | COG  |   |         |
| 12 | 1236256           | 1236309 | 54nt indel repeat<br>1 X in NQ352<br>2 X in NQ1701         | tatattgctt gtcttttggt<br>tttcttggtc tacttttatt<br>tgattgtag tctc                   | putative                                                        | -                                                           | 1187       | 1113 | - |         |
| 13 | 1297760           | 1297849 | difference in 10nt repeat<br>9 X in NQ352<br>8 X in NQ1701 | aagattaaac                                                                         | no annotation/ intergenic                                       |                                                             |            |      |   |         |
| 14 | 1305366           | 1305379 | 14nt indel                                                 | cagggctttttctt                                                                     | hypothetical protein                                            | -                                                           | 1252       | 1173 | E |         |
| 15 | 1357965           | 1358061 | difference in 8nt repeat<br>12 X in NQ352<br>13X in NQ352  | tatgtatt                                                                           | no annotation/ intergenic                                       |                                                             |            |      |   |         |
| 16 | 1419103           | 1419126 | difference in 12nt repeat<br>2 X in NQ352<br>1 X in NQ1701 | gctctttttctt                                                                       | probable protein encoding<br>sequence (Kodon)                   | (BLAST: hypothetical protein<br>HPP12_1343 [H. pylori P12]) |            |      |   |         |
| 17 | 1476690           | 1476763 | 74nt indel                                                 | aagataaaac catcattaa<br>aaaacatttc acatttcaca<br>ttcataagat aaacatttca<br>aagataaa | no annotation/ intergenic                                       |                                                             |            |      |   |         |
| 18 | 1476863           | 1476888 | difference in repeat                                       | caaccattca ccattcaatc<br>ttca                                                      | hypothetical protein                                            |                                                             | 1408       | 1300 | - |         |
| 19 | 1495286           | 1495297 | difference in 3nt repeat<br>X in NQ352<br>3 X in NQ1701    | 4<br>ggt                                                                           | putative histidine and glutamine-<br>rich metal-binding protein | hpn                                                         | 1432       | 1321 | - |         |

**Table S15 c: Differences in strain set NQ392/1707/4060 not categorized as SNPs or CNPs**

| No | Position in NQ392 |        | type of differenc                                                                   | sequence                                | gene affected by difference                              |           |            |      |   | comment                                              |
|----|-------------------|--------|-------------------------------------------------------------------------------------|-----------------------------------------|----------------------------------------------------------|-----------|------------|------|---|------------------------------------------------------|
|    | start             | end    |                                                                                     |                                         |                                                          | HP-number | jhp-number | COG  |   |                                                      |
| 1  | 20160             | 20939  | additional contig (C50) in NQ392                                                    |                                         | type I restricton enzyme (modification subunit)          | hsdM_3    | 1403       | 1423 | V | missing in NQ4060 - not associated with Contigborder |
| 2  | 103912            | 103916 | difference in 3nt repeat<br>7 X in NQ392<br>6 X in NQ1707<br>CNP in NQ4060          | tag                                     | outer membrane protein                                   |           | 0009       | 0007 | - |                                                      |
| 3  | 104644            | 104645 | 2nt indel in NQ1707                                                                 | tt                                      | no annotation / intergenic                               |           |            |      |   |                                                      |
| 4  | 309513            | 309514 | difference in 2nt repeat<br>8 X in NQ392<br>9 X in NQ1707<br>9 X in NQ4060          | ct                                      | putative lipopolysaccharide biosynthesis protein         |           | 0208       | 0194 | M | phase variable repeat                                |
| 5  | 623709            | 623741 | 33nt indel<br>missing in NQ4060                                                     | tttctgtggg gttgtcaaga<br>tgattgtctg agc | cag island protein                                       | orf13/14  | 0527       | 0476 | U |                                                      |
| 6  | 864243            | 864244 | difference in 14nt repeat<br>4 X in NQ392<br>5 X in NQ1707<br>3 X in NQ4060         | agcagttaaa aagg                         | no annotation / intergenic                               |           |            |      |   |                                                      |
| 7  | 887675            | 887676 | 2nt indel<br>missing in NQ1707                                                      | cc                                      | no annotation / intergenic                               |           |            |      |   |                                                      |
| 8  | 912602            | 912623 | difference in 11nt repeat<br>3 X in NQ392<br>Contigborder in NQ1707<br>2X in NQ4060 | aaacaaccatt                             | no annotation/ intergenic                                |           |            |      |   |                                                      |
| 9  | 913274            | 913276 | CNP between NQ1707 and NQ4060                                                       |                                         | putative type I restriction enzyme (specificity subunit) | hsdS_4    |            | 0726 | V |                                                      |

| No | Position in NQ392 |         | type of differenc                                                                                         | sequence                   | gene affected by difference   |      |           |            | comment |                       |
|----|-------------------|---------|-----------------------------------------------------------------------------------------------------------|----------------------------|-------------------------------|------|-----------|------------|---------|-----------------------|
|    | start             | end     |                                                                                                           |                            |                               |      | HP-number | jhp-number |         | COG                   |
| 10 | 1013253           | 1013266 | diffrence in 2nt repeat<br>7 X in NQ392<br>8 X in NQ1707<br>8 X in NQ4060                                 | ct                         | outer membrane protein        | babB | 0896      | 1164       | -       | phase variable repeat |
| 11 | 1029272           | 1029280 | difference in 9nt repeat<br>3 X in NQ392<br>3 X in NQ1707<br>2 X in NQ4060                                | aatggaact                  | outer membrane protein/ porin | hopC | 0912      | 0848       | -       |                       |
| 12 | 1296875           | 1296876 | difference in slightly degenerated 21nt repeat<br>5 X in NQ392<br>Contigborder in NQ1707<br>6 X in NQ4060 | ctgtcttttg tttttcttgt<br>t | hypothetical protein          |      | 1187      | 1113       | -       |                       |
| 13 | 1501421           | 1501422 | 2nt indel in NQ4060                                                                                       | ta                         | no annotation / intergenic    |      |           |            |         |                       |
| 14 | 1563604           | 1563923 | 318bp deletion in NQ4060                                                                                  |                            | no annotation / intergenic    |      |           |            |         |                       |
| 15 | 1614309           | 1614310 | difference in 9nt repeat<br>2 X in NQ392<br>2 X in NQ1707<br>3 X in NQ4060                                | gttttttagt                 | hypothetical protein          |      | 1482      | 1375       |         |                       |

**Table S15 d: Differences in strain set NQ367/1671/4191 not categorized as SNPs or CNPs**

| No | Position in NQ367 |        | type of difference                                                           | sequence              | gene affected by difference                         |          | HP-number     | jhp-number | COG | comment |
|----|-------------------|--------|------------------------------------------------------------------------------|-----------------------|-----------------------------------------------------|----------|---------------|------------|-----|---------|
|    | start             | end    |                                                                              |                       |                                                     |          |               |            |     |         |
| 1  | 4477              | 4478   | difference in 12 nt repeat<br>6 X in NQ367<br>7 X in NQ1671<br>8 X in NQ4191 | aaaaaagaaa gc         | putative recombination protein<br>RecB (addA?)      | pcrA     | 1553          | 1446       | L   |         |
| 2  | 53724             | 53725  | difference in 7 nt repeat<br>7 X in NQ367<br>9 X in NQ1671<br>10 X in NQ4191 | agtgatt               | no annotation/ intergenic                           |          |               |            |     |         |
| 3  | 74334             | 74345  | difference in 13 nt repeat<br>3 X in NQ367<br>3 X in NQ1671<br>2 X in NQ4191 | attaaggttt ttg        | no annotation/ intergenic                           |          |               |            |     |         |
| 4  | 91725             | 91726  | difference in 9 nt repeat<br>8 X in NQ367<br>7 X in NQ1671<br>11 X in NQ4191 | aaagaaaat             | DNA transformation<br>compentancy                   | comB2    | 0039/<br>0040 | 0035       | U   |         |
| 5  | 199955            | 199956 | 2 nt indel missing in<br>NQ1671                                              | gt                    | L-lactate permease                                  | lldP_2   | 0141          | 0129       | C   |         |
| 6  | 216595            | 216596 | difference in 6 nt repeat<br>1 X in NQ367<br>1 X in NQ1671<br>2 X in NQ4191  | aatagc                | no annotation/ intergenic                           |          |               |            |     |         |
| 7  | 570023            | 570024 | 2 nt indel missing in<br>NQ1671 and NQ4191                                   | ac                    | cag island protein, DNA transfer<br>protein         | virB11_1 | 0525          | 0474       | NU  |         |
| 8  | 595528            | 595529 | 2nt indel , missing in<br>NQ4060                                             | ag                    | no annotation/ intergenic                           |          |               |            |     |         |
| 9  | 677463            | 677529 | difference in 21 nt repeat<br>4 X in NQ367<br>4 X in NQ1671<br>2 X in NQ4191 | aaaatacgat gatctcacag | putative lipopolysaccharide<br>biosynthesis protein |          | 0619          | 0563       | M   |         |

| No | Position in NQ367 |         | type of difference                                                                    | sequence        | gene affected by difference    |      | HP-number | jhp-number | COG | comment |
|----|-------------------|---------|---------------------------------------------------------------------------------------|-----------------|--------------------------------|------|-----------|------------|-----|---------|
|    | start             | end     |                                                                                       |                 |                                |      |           |            |     |         |
| 10 | 758109            | 758110  | 14 nt indel in NQ4191                                                                 | aatagctaaa ctct | putative hydantoin utilization |      | 0695      | 0633       | EQ  |         |
| 11 | 961006            | 961007  | 134 nt indel in NQ4191<br>Contigborder in NQ1671                                      |                 | no annotation/ intergenic      |      |           |            |     |         |
| 12 | 978744            | 978748  | difference in 9 nt repeat<br>Contigborder in NQ367<br>12 X in NQ1707<br>8 X in NQ4191 | tttattatg       | no annotation/ intergenic      |      |           |            |     |         |
| 13 | 1109538           | 1109541 | difference in 4 nt repeat<br>3 X in NQ367<br>3 X in NQ1671<br>2 X in NQ4191           | cttt            | no annotation/ intergenic      |      |           |            |     |         |
| 14 | 1142005           | 1142006 | difference in 2 nt repeat<br>2 X in NQ367<br>3 X in NQ1671<br>3 X in NQ4191           | tg              | glutamate dehydrogenase        | gdhA | 0380      | 1001       | E   |         |
| 15 | 1327216           | 1327217 | difference in 13 nt repeat<br>3 X in NQ367<br>3 X in NQ1671<br>4 X in NQ4191          | tttggtgttt caa  | no annotation/ intergenic      |      |           |            |     |         |
| 16 | 1389417           | 1389418 | difference in 8 nt repeat<br>Contigborder in NQ367<br>12 X in NQ1671<br>7 X in NQ4191 | tttatgta        | no annotation/ intergenic      |      |           |            |     |         |
| 17 | 1592570           | 1592618 | difference in 8 nt repeat<br>7 X in NQ367<br>Contigborder in N1671<br>9 X in NQ4191   | atggttga        | hypothetical protein           |      | 1408      | 1300       | -   |         |
